# Supplementary material
Source: Research Square preprint supplement (doi:10.21203/rs.3.rs-9998917/v1)
Supplement: Supplementary file 1 [file 2447373934d3cdbf1d012a7b.xlsx]

## Sheet: Sheet1
Registration_number	Bacterial_species	Resistance_phenotype	Cefiderocol_MIC_mg/L	EUCAST_2025_interpretation	Breakpoint
293	Escherichia coli	CRE	0.38	Susceptible (S)	S ≤ 2 mg/L, R > 2 mg/L (EUCAST 2024)
223	Pantoea spp	E-BLSE	0.016	Susceptible (S)	S ≤ 2 mg/L, R > 2 mg/L (EUCAST 2024)
3377	Klebsiella pneumoniae	E-BLSE	0.016	Susceptible (S)	S ≤ 2 mg/L, R > 2 mg/L (EUCAST 2024)
3378	Klebsiella oxytoca	E-BLSE	0.016	Susceptible (S)	S ≤ 2 mg/L, R > 2 mg/L (EUCAST 2024)
2805	Escherichia coli	E-BLSE	0.016	Susceptible (S)	S ≤ 2 mg/L, R > 2 mg/L (EUCAST 2024)
6	Pseudomonas aeruginosa	CRPA	0.75	Susceptible (S)	S ≤ 2 mg/L, R > 2 mg/L (EUCAST 2024)
201	Proteus mirabilis	E-BLSE	0.064	Susceptible (S)	S ≤ 2 mg/L, R > 2 mg/L (EUCAST 2024)
3778	Klebsiella oxytoca	CRE	0.016	Susceptible (S)	S ≤ 2 mg/L, R > 2 mg/L (EUCAST 2024)
477	Escherichia coli	CRE	0.094	Susceptible (S)	S ≤ 2 mg/L, R > 2 mg/L (EUCAST 2024)
470	Escherichia coli	CRE	0.5	Susceptible (S)	S ≤ 2 mg/L, R > 2 mg/L (EUCAST 2024)
3635	Escherichia coli	CRE	256	Resistant (R)	S ≤ 2 mg/L, R > 2 mg/L (EUCAST 2024)
15	Klebsiella oxytoca	E-BLSE	0.064	Susceptible (S)	S ≤ 2 mg/L, R > 2 mg/L (EUCAST 2024)
2172	Pseudomonas aeruginosa	CRPA	0.5	Susceptible (S)	S ≤ 2 mg/L, R > 2 mg/L (EUCAST 2024)
2288	Pseudomonas aeruginosa	CRPA	0.38	Susceptible (S)	S ≤ 2 mg/L, R > 2 mg/L (EUCAST 2024)
554	Pseudomonas aeruginosa	CRPA	0.5	Susceptible (S)	S ≤ 2 mg/L, R > 2 mg/L (EUCAST 2024)
4887	Pseudomonas aeruginosa	CRPA	0.5	Susceptible (S)	S ≤ 2 mg/L, R > 2 mg/L (EUCAST 2024)
236	Pseudomonas aeruginosa	CRPA	0.125	Susceptible (S)	S ≤ 2 mg/L, R > 2 mg/L (EUCAST 2024)
2968	Escherichia coli	E-BLSE	0.125	Susceptible (S)	S ≤ 2 mg/L, R > 2 mg/L (EUCAST 2024)
2907	Escherichia coli	E-BLSE	0.016	Susceptible (S)	S ≤ 2 mg/L, R > 2 mg/L (EUCAST 2024)
2899	Escherichia coli	E-BLSE	0.094	Susceptible (S)	S ≤ 2 mg/L, R > 2 mg/L (EUCAST 2024)
1852	Pantoea spp	E-BLSE	0.016	Susceptible (S)	S ≤ 2 mg/L, R > 2 mg/L (EUCAST 2024)
2110	Escherichia coli	E-BLSE	0.016	Susceptible (S)	S ≤ 2 mg/L, R > 2 mg/L (EUCAST 2024)
2260	Escherichia coli	E-BLSE	0.016	Susceptible (S)	S ≤ 2 mg/L, R > 2 mg/L (EUCAST 2024)
2142	Klebsiella pneumoniae	E-BLSE	0.016	Susceptible (S)	S ≤ 2 mg/L, R > 2 mg/L (EUCAST 2024)
2207	Salmonella spp	E-BLSE	0.016	Susceptible (S)	S ≤ 2 mg/L, R > 2 mg/L (EUCAST 2024)
2216	Salmonella spp	E-BLSE	0.016	Susceptible (S)	S ≤ 2 mg/L, R > 2 mg/L (EUCAST 2024)
2229	Escherichia coli	E-BLSE	0.016	Susceptible (S)	S ≤ 2 mg/L, R > 2 mg/L (EUCAST 2024)
2884	Escherichia coli	E-BLSE	0.016	Susceptible (S)	S ≤ 2 mg/L, R > 2 mg/L (EUCAST 2024)
1932	Escherichia coli	E-BLSE	0.125	Susceptible (S)	S ≤ 2 mg/L, R > 2 mg/L (EUCAST 2024)
2224	Escherichia coli	E-BLSE	0.016	Susceptible (S)	S ≤ 2 mg/L, R > 2 mg/L (EUCAST 2024)
2158	Escherichia coli	E-BLSE	0.016	Susceptible (S)	S ≤ 2 mg/L, R > 2 mg/L (EUCAST 2024)
2243	Klebsiella pneumoniae	E-BLSE	0.016	Susceptible (S)	S ≤ 2 mg/L, R > 2 mg/L (EUCAST 2024)
2268	Serratia odorifera	E-BLSE	0.016	Susceptible (S)	S ≤ 2 mg/L, R > 2 mg/L (EUCAST 2024)
1857	Escherichia coli	E-BLSE	0.016	Susceptible (S)	S ≤ 2 mg/L, R > 2 mg/L (EUCAST 2024)
1998	Escherichia coli	E-BLSE	0.016	Susceptible (S)	S ≤ 2 mg/L, R > 2 mg/L (EUCAST 2024)
2131	Klebsiella pneumoniae	E-BLSE	0.016	Susceptible (S)	S ≤ 2 mg/L, R > 2 mg/L (EUCAST 2024)
2619	Pantoea spp	E-BLSE	0.016	Susceptible (S)	S ≤ 2 mg/L, R > 2 mg/L (EUCAST 2024)
2193	Escherichia coli	E-BLSE	0.016	Susceptible (S)	S ≤ 2 mg/L, R > 2 mg/L (EUCAST 2024)
2205	Escherichia coli	E-BLSE	0.016	Susceptible (S)	S ≤ 2 mg/L, R > 2 mg/L (EUCAST 2024)
2426	Escherichia coli	E-BLSE	0.016	Susceptible (S)	S ≤ 2 mg/L, R > 2 mg/L (EUCAST 2024)
2446	Escherichia coli	E-BLSE	0.016	Susceptible (S)	S ≤ 2 mg/L, R > 2 mg/L (EUCAST 2024)
2108	Escherichia coli	E-BLSE	0.016	Susceptible (S)	S ≤ 2 mg/L, R > 2 mg/L (EUCAST 2024)
1900	Serratia marcescens	E-BLSE	0.016	Susceptible (S)	S ≤ 2 mg/L, R > 2 mg/L (EUCAST 2024)
2259	Klebsiella pneumoniae	E-BLSE	0.016	Susceptible (S)	S ≤ 2 mg/L, R > 2 mg/L (EUCAST 2024)
2398	Escherichia coli	E-BLSE	0.016	Susceptible (S)	S ≤ 2 mg/L, R > 2 mg/L (EUCAST 2024)
2600	Escherichia coli	E-BLSE	0.016	Susceptible (S)	S ≤ 2 mg/L, R > 2 mg/L (EUCAST 2024)
2693	Klebsiella pneumoniae	E-BLSE	0.016	Susceptible (S)	S ≤ 2 mg/L, R > 2 mg/L (EUCAST 2024)
2637	Klebsiella pneumoniae	E-BLSE	0.016	Susceptible (S)	S ≤ 2 mg/L, R > 2 mg/L (EUCAST 2024)
1958	Escherichia coli	E-BLSE	0.016	Susceptible (S)	S ≤ 2 mg/L, R > 2 mg/L (EUCAST 2024)
2137	Escherichia coli	E-BLSE	0.016	Susceptible (S)	S ≤ 2 mg/L, R > 2 mg/L (EUCAST 2024)
2279	Proteus mirabilis	E-BLSE	0.016	Susceptible (S)	S ≤ 2 mg/L, R > 2 mg/L (EUCAST 2024)
2404	Proteus mirabilis	E-BLSE	0.016	Susceptible (S)	S ≤ 2 mg/L, R > 2 mg/L (EUCAST 2024)
1457	Klebsiella pneumoniae	E-BLSE	0.064	Susceptible (S)	S ≤ 2 mg/L, R > 2 mg/L (EUCAST 2024)
1500	Escherichia coli	E-BLSE	0.016	Susceptible (S)	S ≤ 2 mg/L, R > 2 mg/L (EUCAST 2024)
1502	Klebsiella pneumoniae	E-BLSE	0.016	Susceptible (S)	S ≤ 2 mg/L, R > 2 mg/L (EUCAST 2024)
1788	Escherichia coli	E-BLSE	0.016	Susceptible (S)	S ≤ 2 mg/L, R > 2 mg/L (EUCAST 2024)
2442	Proteus mirabilis	E-BLSE	0.016	Susceptible (S)	S ≤ 2 mg/L, R > 2 mg/L (EUCAST 2024)
1388	Klebsiella pneumoniae	E-BLSE	0.016	Susceptible (S)	S ≤ 2 mg/L, R > 2 mg/L (EUCAST 2024)
1389	Escherichia coli	E-BLSE	0.016	Susceptible (S)	S ≤ 2 mg/L, R > 2 mg/L (EUCAST 2024)
1390	Escherichia coli	E-BLSE	0.016	Susceptible (S)	S ≤ 2 mg/L, R > 2 mg/L (EUCAST 2024)
1400	Escherichia coli	E-BLSE	0.016	Susceptible (S)	S ≤ 2 mg/L, R > 2 mg/L (EUCAST 2024)
1436	Escherichia coli	E-BLSE	0.016	Susceptible (S)	S ≤ 2 mg/L, R > 2 mg/L (EUCAST 2024)
1458	Escherichia coli	E-BLSE	0.125	Susceptible (S)	S ≤ 2 mg/L, R > 2 mg/L (EUCAST 2024)
1426	Escherichia coli	E-BLSE	0.094	Susceptible (S)	S ≤ 2 mg/L, R > 2 mg/L (EUCAST 2024)
1785	Klebsiella pneumoniae	E-BLSE	0.094	Susceptible (S)	S ≤ 2 mg/L, R > 2 mg/L (EUCAST 2024)
1748	Escherichia coli	E-BLSE	0.094	Susceptible (S)	S ≤ 2 mg/L, R > 2 mg/L (EUCAST 2024)
1697	Klebsiella oxytoca	E-BLSE	0.016	Susceptible (S)	S ≤ 2 mg/L, R > 2 mg/L (EUCAST 2024)
1773	Klebsiella pneumoniae	E-BLSE	0.016	Susceptible (S)	S ≤ 2 mg/L, R > 2 mg/L (EUCAST 2024)
1713	Serratia marcescens	E-BLSE	0.016	Susceptible (S)	S ≤ 2 mg/L, R > 2 mg/L (EUCAST 2024)
2133	Escherichia coli	E-BLSE	0.016	Susceptible (S)	S ≤ 2 mg/L, R > 2 mg/L (EUCAST 2024)
1979	Escherichia coli	E-BLSE	0.016	Susceptible (S)	S ≤ 2 mg/L, R > 2 mg/L (EUCAST 2024)
2386	Escherichia coli	E-BLSE	0.016	Susceptible (S)	S ≤ 2 mg/L, R > 2 mg/L (EUCAST 2024)
2125	Klebsiella pneumoniae	E-BLSE	0.016	Susceptible (S)	S ≤ 2 mg/L, R > 2 mg/L (EUCAST 2024)
1917	Escherichia coli	E-BLSE	0.016	Susceptible (S)	S ≤ 2 mg/L, R > 2 mg/L (EUCAST 2024)
2208	Escherichia coli	E-BLSE	0.016	Susceptible (S)	S ≤ 2 mg/L, R > 2 mg/L (EUCAST 2024)
2039	Proteus mirabilis	E-BLSE	0.016	Susceptible (S)	S ≤ 2 mg/L, R > 2 mg/L (EUCAST 2024)
1895	Escherichia coli	E-BLSE	0.016	Susceptible (S)	S ≤ 2 mg/L, R > 2 mg/L (EUCAST 2024)
2272	Escherichia coli	E-BLSE	0.016	Susceptible (S)	S ≤ 2 mg/L, R > 2 mg/L (EUCAST 2024)
2030	Escherichia coli	E-BLSE	0.016	Susceptible (S)	S ≤ 2 mg/L, R > 2 mg/L (EUCAST 2024)
1975	Klebsiella pneumoniae	E-BLSE	0.016	Susceptible (S)	S ≤ 2 mg/L, R > 2 mg/L (EUCAST 2024)
2018	Klebsiella pneumoniae	E-BLSE	0.016	Susceptible (S)	S ≤ 2 mg/L, R > 2 mg/L (EUCAST 2024)
2299	Escherichia coli	E-BLSE	0.016	Susceptible (S)	S ≤ 2 mg/L, R > 2 mg/L (EUCAST 2024)
1944	Klebsiella pneumoniae	E-BLSE	0.016	Susceptible (S)	S ≤ 2 mg/L, R > 2 mg/L (EUCAST 2024)
2257	klebsiella oxytoca	E-BLSE	0.016	Susceptible (S)	S ≤ 2 mg/L, R > 2 mg/L (EUCAST 2024)
2128	Escherichia coli	E-BLSE	0.016	Susceptible (S)	S ≤ 2 mg/L, R > 2 mg/L (EUCAST 2024)
1907	Escherichia coli	E-BLSE	0.016	Susceptible (S)	S ≤ 2 mg/L, R > 2 mg/L (EUCAST 2024)
2993	Pseudomonas aeruginosa	CRPA	0.047	Susceptible (S)	S ≤ 2 mg/L, R > 2 mg/L (EUCAST 2024)
2	Klebsiella oxytoca	CRE	0.5	Susceptible (S)	S ≤ 2 mg/L, R > 2 mg/L (EUCAST 2024)
869	Salmonella spp	CRE	0.5	Susceptible (S)	S ≤ 2 mg/L, R > 2 mg/L (EUCAST 2024)
1408	Escherichia coli	CRE	256	Resistant (R)	S ≤ 2 mg/L, R > 2 mg/L (EUCAST 2024)
442	Pseudomonas aeruginosa	CRPA	0.016	Susceptible (S)	S ≤ 2 mg/L, R > 2 mg/L (EUCAST 2024)
1292	Escherichia coli	CRE	0.19	Susceptible (S)	S ≤ 2 mg/L, R > 2 mg/L (EUCAST 2024)
813	Escherichia coli	E-BLSE	0.38	Susceptible (S)	S ≤ 2 mg/L, R > 2 mg/L (EUCAST 2024)
2494	Escherichia coli	CRE	0.75	Susceptible (S)	S ≤ 2 mg/L, R > 2 mg/L (EUCAST 2024)
1387	Escherichia coli	CRE	0.094	Susceptible (S)	S ≤ 2 mg/L, R > 2 mg/L (EUCAST 2024)
1454	Serratia odorifera	CRE	4	Resistant (R)	S ≤ 2 mg/L, R > 2 mg/L (EUCAST 2024)
2153	Escherichia coli	CRE	1	Susceptible (S)	S ≤ 2 mg/L, R > 2 mg/L (EUCAST 2024)
3452	Acinetobacter baumannii	CRAB	0.125	Susceptible (S)	S ≤ 2 mg/L, R > 2 mg/L (EUCAST 2024)
2621	Escherichia coli	CRE	0.19	Susceptible (S)	S ≤ 2 mg/L, R > 2 mg/L (EUCAST 2024)
4992	Acinetobacter baumannii	CRAB	0.016	Susceptible (S)	S ≤ 2 mg/L, R > 2 mg/L (EUCAST 2024)
2062	Escherichia coli	CRE	2	Susceptible (S)	S ≤ 2 mg/L, R > 2 mg/L (EUCAST 2024)
29	Escherichia coli	E-BLSE	0.75	Susceptible (S)	S ≤ 2 mg/L, R > 2 mg/L (EUCAST 2024)
1953	Acinetobacter baumannii	CRAB	0.75	Susceptible (S)	S ≤ 2 mg/L, R > 2 mg/L (EUCAST 2024)
1927	Escherichia coli	CRE	0.125	Susceptible (S)	S ≤ 2 mg/L, R > 2 mg/L (EUCAST 2024)
37	Serratia marcescens	E-BLSE	0.25	Susceptible (S)	S ≤ 2 mg/L, R > 2 mg/L (EUCAST 2024)
1834	Escherichia coli	E-BLSE	0.25	Susceptible (S)	S ≤ 2 mg/L, R > 2 mg/L (EUCAST 2024)
1725	Acinetobacter baumannii	CRAB	0.75	Susceptible (S)	S ≤ 2 mg/L, R > 2 mg/L (EUCAST 2024)
1438	Acinetobacter baumannii	CRAB	6	Resistant (R)	S ≤ 2 mg/L, R > 2 mg/L (EUCAST 2024)
991	Serratia odorifera	CRE	0.125	Susceptible (S)	S ≤ 2 mg/L, R > 2 mg/L (EUCAST 2024)
2075	klebsiella pneumoniae	CRE	0.38	Susceptible (S)	S ≤ 2 mg/L, R > 2 mg/L (EUCAST 2024)
210	klebsiella pneumoniae	CRE	0.75	Susceptible (S)	S ≤ 2 mg/L, R > 2 mg/L (EUCAST 2024)
2580	Klebsiella pneumoniae	CRE	4	Resistant (R)	S ≤ 2 mg/L, R > 2 mg/L (EUCAST 2024)
134	Escherichia coli	CRE	0.38	Susceptible (S)	S ≤ 2 mg/L, R > 2 mg/L (EUCAST 2024)
238	Escherichia coli	CRE	0.38	Susceptible (S)	S ≤ 2 mg/L, R > 2 mg/L (EUCAST 2024)
1377	klebsiella pneumoniae	CRE	0.064	Susceptible (S)	S ≤ 2 mg/L, R > 2 mg/L (EUCAST 2024)
234	Pseudomonas aeruginosa	CRPA	0.125	Susceptible (S)	S ≤ 2 mg/L, R > 2 mg/L (EUCAST 2024)
59	klebsiella pneumoniae	CRE	0.38	Susceptible (S)	S ≤ 2 mg/L, R > 2 mg/L (EUCAST 2024)
2686	Pseudomonas aeruginosa	CRPA	0.38	Susceptible (S)	S ≤ 2 mg/L, R > 2 mg/L (EUCAST 2024)
1059	Citrobacter spp	CRE	0.38	Susceptible (S)	S ≤ 2 mg/L, R > 2 mg/L (EUCAST 2024)
2496	klebsiella pneumoniae	CRE	0.5	Susceptible (S)	S ≤ 2 mg/L, R > 2 mg/L (EUCAST 2024)
2403	Escherichia coli	CRE	2	Susceptible (S)	S ≤ 2 mg/L, R > 2 mg/L (EUCAST 2024)
2152	Pseudomonas aeruginosa	CRPA	0.032	Susceptible (S)	S ≤ 2 mg/L, R > 2 mg/L (EUCAST 2024)
2041	Escherichia coli	CRE	0.38	Susceptible (S)	S ≤ 2 mg/L, R > 2 mg/L (EUCAST 2024)
2182	Acinetobacter baumannii	CRAB	0.38	Susceptible (S)	S ≤ 2 mg/L, R > 2 mg/L (EUCAST 2024)
804	Enterobacter spp	CRE	0.38	Susceptible (S)	S ≤ 2 mg/L, R > 2 mg/L (EUCAST 2024)
208	Yersinia pseudotuberculosis	CRE	0.38	Susceptible (S)	S ≤ 2 mg/L, R > 2 mg/L (EUCAST 2024)
111	Escherichia coli	E-BLSE	0.25	Susceptible (S)	S ≤ 2 mg/L, R > 2 mg/L (EUCAST 2024)
936	Pseudomonas aeruginosa	CRPA	0.5	Susceptible (S)	S ≤ 2 mg/L, R > 2 mg/L (EUCAST 2024)
2536	Citrobacter spp	CRE	0.38	Susceptible (S)	S ≤ 2 mg/L, R > 2 mg/L (EUCAST 2024)
36	Pseudomonas aeruginosa	CRPA	0.016	Susceptible (S)	S ≤ 2 mg/L, R > 2 mg/L (EUCAST 2024)
2027	Klebsiella pneumoniae	CRE	0.38	Susceptible (S)	S ≤ 2 mg/L, R > 2 mg/L (EUCAST 2024)
2195	Escherichia coli	CRE	0.25	Susceptible (S)	S ≤ 2 mg/L, R > 2 mg/L (EUCAST 2024)
1753	Escherichia coli	CRE	1.5	Susceptible (S)	S ≤ 2 mg/L, R > 2 mg/L (EUCAST 2024)
11	klebsiella pneumoniae	E-BLSE	0.023	Susceptible (S)	S ≤ 2 mg/L, R > 2 mg/L (EUCAST 2024)
12	Acinetobacter baumannii	CRAB	0.38	Susceptible (S)	S ≤ 2 mg/L, R > 2 mg/L (EUCAST 2024)
3218	Pseudomonas aeruginosa	CRPA	0.125	Susceptible (S)	S ≤ 2 mg/L, R > 2 mg/L (EUCAST 2024)
3242	Klebsiella pneumoniae	E-BLSE	0.032	Susceptible (S)	S ≤ 2 mg/L, R > 2 mg/L (EUCAST 2024)
3246	Serratia odorifera	E-BLSE	0.125	Susceptible (S)	S ≤ 2 mg/L, R > 2 mg/L (EUCAST 2024)
303	Escherichia coli	E-BLSE	0.032	Susceptible (S)	S ≤ 2 mg/L, R > 2 mg/L (EUCAST 2024)
3264	Pseudomonas aeruginosa	CRPA	1.5	Susceptible (S)	S ≤ 2 mg/L, R > 2 mg/L (EUCAST 2024)
3250	Escherichia coli	CRE	1.5	Susceptible (S)	S ≤ 2 mg/L, R > 2 mg/L (EUCAST 2024)
3061	Escherichia coli	E-BLSE	0.125	Susceptible (S)	S ≤ 2 mg/L, R > 2 mg/L (EUCAST 2024)
3069	Morganella morganii	E-BLSE	0.016	Susceptible (S)	S ≤ 2 mg/L, R > 2 mg/L (EUCAST 2024)
3098	Escherichia coli	E-BLSE	0.016	Susceptible (S)	S ≤ 2 mg/L, R > 2 mg/L (EUCAST 2024)
3100	Klebsiella pneumoniae	CRE	0.125	Susceptible (S)	S ≤ 2 mg/L, R > 2 mg/L (EUCAST 2024)
277	Escherichia coli	CRE	1	Susceptible (S)	S ≤ 2 mg/L, R > 2 mg/L (EUCAST 2024)
843	klebsiella pneumoniae	E-BLSE	0.094	Susceptible (S)	S ≤ 2 mg/L, R > 2 mg/L (EUCAST 2024)
834	klebsiella pneumoniae	E-BLSE	0.032	Susceptible (S)	S ≤ 2 mg/L, R > 2 mg/L (EUCAST 2024)
220	Escherichia coli	CRE	0.38	Susceptible (S)	S ≤ 2 mg/L, R > 2 mg/L (EUCAST 2024)
2013	Escherichia coli	E-BLSE	0.064	Susceptible (S)	S ≤ 2 mg/L, R > 2 mg/L (EUCAST 2024)
2042	Escherichia coli	E-BLSE	0.016	Susceptible (S)	S ≤ 2 mg/L, R > 2 mg/L (EUCAST 2024)
217	Enterobacter spp	CRE	0.38	Susceptible (S)	S ≤ 2 mg/L, R > 2 mg/L (EUCAST 2024)
376	Klebsiella oxytoca	E-BLSE	0.38	Susceptible (S)	S ≤ 2 mg/L, R > 2 mg/L (EUCAST 2024)
739	klebsiella pneumoniae	E-BLSE	0.38	Susceptible (S)	S ≤ 2 mg/L, R > 2 mg/L (EUCAST 2024)
722	Escherichia coli	E-BLSE	0.38	Susceptible (S)	S ≤ 2 mg/L, R > 2 mg/L (EUCAST 2024)
735	Escherichia coli	E-BLSE	0.38	Susceptible (S)	S ≤ 2 mg/L, R > 2 mg/L (EUCAST 2024)
2385	Escherichia coli	E-BLSE	0.38	Susceptible (S)	S ≤ 2 mg/L, R > 2 mg/L (EUCAST 2024)
2085	klebsiella pneumoniae	E-BLSE	0.38	Susceptible (S)	S ≤ 2 mg/L, R > 2 mg/L (EUCAST 2024)
2326	klebsiella pneumoniae	E-BLSE	0.38	Susceptible (S)	S ≤ 2 mg/L, R > 2 mg/L (EUCAST 2024)
1764	klebsiella pneumoniae	E-BLSE	0.38	Susceptible (S)	S ≤ 2 mg/L, R > 2 mg/L (EUCAST 2024)
1969	Escherichia coli	E-BLSE	0.25	Susceptible (S)	S ≤ 2 mg/L, R > 2 mg/L (EUCAST 2024)
2275	Escherichia coli	E-BLSE	0.016	Susceptible (S)	S ≤ 2 mg/L, R > 2 mg/L (EUCAST 2024)
1989	Klebsiella pneumoniae	E-BLSE	0.016	Susceptible (S)	S ≤ 2 mg/L, R > 2 mg/L (EUCAST 2024)
2033	Escherichia coli	E-BLSE	0.016	Susceptible (S)	S ≤ 2 mg/L, R > 2 mg/L (EUCAST 2024)
2087	Escherichia coli	E-BLSE	0.016	Susceptible (S)	S ≤ 2 mg/L, R > 2 mg/L (EUCAST 2024)
179	Escherichia coli	E-BLSE	0.094	Susceptible (S)	S ≤ 2 mg/L, R > 2 mg/L (EUCAST 2024)
3134	Escherichia coli	CRE	0.38	Susceptible (S)	S ≤ 2 mg/L, R > 2 mg/L (EUCAST 2024)
181	Pseudomonas aeruginosa	CRPA	0.5	Susceptible (S)	S ≤ 2 mg/L, R > 2 mg/L (EUCAST 2024)
282	Citrobacter spp	E-BLSE	1	Susceptible (S)	S ≤ 2 mg/L, R > 2 mg/L (EUCAST 2024)
3117	Escherichia coli	CRE	0.75	Susceptible (S)	S ≤ 2 mg/L, R > 2 mg/L (EUCAST 2024)
3114	Enterobacter spp	E-BLSE	0.016	Susceptible (S)	S ≤ 2 mg/L, R > 2 mg/L (EUCAST 2024)
75	Escherichia coli	E-BLSE	0.016	Susceptible (S)	S ≤ 2 mg/L, R > 2 mg/L (EUCAST 2024)
560	Serratia liquefasciens	E-BLSE	0.032	Susceptible (S)	S ≤ 2 mg/L, R > 2 mg/L (EUCAST 2024)
844	Klebsiella oxytoca	E-BLSE	0.094	Susceptible (S)	S ≤ 2 mg/L, R > 2 mg/L (EUCAST 2024)
1335	Escherichia coli	E-BLSE	0.064	Susceptible (S)	S ≤ 2 mg/L, R > 2 mg/L (EUCAST 2024)
3	Escherichia coli	E-BLSE	0.064	Susceptible (S)	S ≤ 2 mg/L, R > 2 mg/L (EUCAST 2024)
702	Escherichia coli	E-BLSE	0.94	Susceptible (S)	S ≤ 2 mg/L, R > 2 mg/L (EUCAST 2024)
888	Escherichia coli	E-BLSE	0.94	Susceptible (S)	S ≤ 2 mg/L, R > 2 mg/L (EUCAST 2024)
1347	Escherichia coli	E-BLSE	0.016	Susceptible (S)	S ≤ 2 mg/L, R > 2 mg/L (EUCAST 2024)
110	Escherichia coli	E-BLSE	0.016	Susceptible (S)	S ≤ 2 mg/L, R > 2 mg/L (EUCAST 2024)
703	Escherichia coli	E-BLSE	0.016	Susceptible (S)	S ≤ 2 mg/L, R > 2 mg/L (EUCAST 2024)
1319	Escherichia coli	E-BLSE	0.016	Susceptible (S)	S ≤ 2 mg/L, R > 2 mg/L (EUCAST 2024)
1359	Klebsiella Oxytoca	E-BLSE	0.19	Susceptible (S)	S ≤ 2 mg/L, R > 2 mg/L (EUCAST 2024)
112	Escherichia coli	E-BLSE	0.016	Susceptible (S)	S ≤ 2 mg/L, R > 2 mg/L (EUCAST 2024)
720	Escherichia coli	E-BLSE	0.016	Susceptible (S)	S ≤ 2 mg/L, R > 2 mg/L (EUCAST 2024)
1320	Escherichia coli	E-BLSE	0.016	Susceptible (S)	S ≤ 2 mg/L, R > 2 mg/L (EUCAST 2024)
1357	Serratia marcescens	E-BLSE	0.047	Susceptible (S)	S ≤ 2 mg/L, R > 2 mg/L (EUCAST 2024)
306	Escherichia coli	E-BLSE	0.047	Susceptible (S)	S ≤ 2 mg/L, R > 2 mg/L (EUCAST 2024)
738	Klebsiella pneumoniae	E-BLSE	0.016	Susceptible (S)	S ≤ 2 mg/L, R > 2 mg/L (EUCAST 2024)
1322	Klebsiella pneumoniae	E-BLSE	0.016	Susceptible (S)	S ≤ 2 mg/L, R > 2 mg/L (EUCAST 2024)
1374	Klebsiella Oxytoca	E-BLSE	0.016	Susceptible (S)	S ≤ 2 mg/L, R > 2 mg/L (EUCAST 2024)
2327	Klebsiella pneumoniae	E-BLSE	0.016	Susceptible (S)	S ≤ 2 mg/L, R > 2 mg/L (EUCAST 2024)
3274	Escherichia coli	E-BLSE	0.016	Susceptible (S)	S ≤ 2 mg/L, R > 2 mg/L (EUCAST 2024)
3288	Escherichia coli	E-BLSE	0.016	Susceptible (S)	S ≤ 2 mg/L, R > 2 mg/L (EUCAST 2024)
3293	Escherichia coli	E-BLSE	0.016	Susceptible (S)	S ≤ 2 mg/L, R > 2 mg/L (EUCAST 2024)
3375	Escherichia coli	E-BLSE	0.016	Susceptible (S)	S ≤ 2 mg/L, R > 2 mg/L (EUCAST 2024)
3279	Escherichia coli	E-BLSE	0.016	Susceptible (S)	S ≤ 2 mg/L, R > 2 mg/L (EUCAST 2024)
3287	Escherichia coli	E-BLSE	0.016	Susceptible (S)	S ≤ 2 mg/L, R > 2 mg/L (EUCAST 2024)
2920	Klebsiella oxytoca	E-BLSE	0.094	Susceptible (S)	S ≤ 2 mg/L, R > 2 mg/L (EUCAST 2024)
2980	Escherichia coli	E-BLSE	0.064	Susceptible (S)	S ≤ 2 mg/L, R > 2 mg/L (EUCAST 2024)
2833	Klebsiella pneumoniae	E-BLSE	0.016	Susceptible (S)	S ≤ 2 mg/L, R > 2 mg/L (EUCAST 2024)
2929	Escherichia coli	E-BLSE	0.094	Susceptible (S)	S ≤ 2 mg/L, R > 2 mg/L (EUCAST 2024)
258	Escherichia coli	E-BLSE	0.094	Susceptible (S)	S ≤ 2 mg/L, R > 2 mg/L (EUCAST 2024)
513	Escherichia coli	E-BLSE	0.064	Susceptible (S)	S ≤ 2 mg/L, R > 2 mg/L (EUCAST 2024)
2786	Escherichia coli	E-BLSE	0.38	Susceptible (S)	S ≤ 2 mg/L, R > 2 mg/L (EUCAST 2024)
2958	Klebsiella pneumoniae	E-BLSE	0.016	Susceptible (S)	S ≤ 2 mg/L, R > 2 mg/L (EUCAST 2024)
2801	klebsiella oxytoca	E-BLSE	0.016	Susceptible (S)	S ≤ 2 mg/L, R > 2 mg/L (EUCAST 2024)
2900	Escherichia coli	E-BLSE	0.125	Susceptible (S)	S ≤ 2 mg/L, R > 2 mg/L (EUCAST 2024)
2743	klebsiella pneumoniae	E-BLSE	0.25	Susceptible (S)	S ≤ 2 mg/L, R > 2 mg/L (EUCAST 2024)
2948	klebsiella pneumoniae	E-BLSE	0.016	Susceptible (S)	S ≤ 2 mg/L, R > 2 mg/L (EUCAST 2024)
2993	Escherichia coli	E-BLSE	0.016	Susceptible (S)	S ≤ 2 mg/L, R > 2 mg/L (EUCAST 2024)
2772	klebsiella pneumoniae	CRE	64	Resistant (R)	S ≤ 2 mg/L, R > 2 mg/L (EUCAST 2024)
256	Acinetobacter baumannii	CRAB	0.25	Susceptible (S)	S ≤ 2 mg/L, R > 2 mg/L (EUCAST 2024)
3046	Escherichia coli	CRE	0.75	Susceptible (S)	S ≤ 2 mg/L, R > 2 mg/L (EUCAST 2024)
2767	Escherichia coli	E-BLSE	0.016	Susceptible (S)	S ≤ 2 mg/L, R > 2 mg/L (EUCAST 2024)
2961	Escherichia coli	E-BLSE	0.016	Susceptible (S)	S ≤ 2 mg/L, R > 2 mg/L (EUCAST 2024)
3034	Escherichia coli	E-BLSE	0.125	Susceptible (S)	S ≤ 2 mg/L, R > 2 mg/L (EUCAST 2024)
3004	Escherichia coli	E-BLSE	0.125	Susceptible (S)	S ≤ 2 mg/L, R > 2 mg/L (EUCAST 2024)
2959	klebsiella pneumoniae	E-BLSE	0.047	Susceptible (S)	S ≤ 2 mg/L, R > 2 mg/L (EUCAST 2024)
1333	Escherichia coli	E-BLSE	0.032	Susceptible (S)	S ≤ 2 mg/L, R > 2 mg/L (EUCAST 2024)
1077	klebsiella pneumoniae	E-BLSE	0.016	Susceptible (S)	S ≤ 2 mg/L, R > 2 mg/L (EUCAST 2024)
3320	Serratia odorifera	E-BLSE	0.016	Susceptible (S)	S ≤ 2 mg/L, R > 2 mg/L (EUCAST 2024)
801	Klebsiella oxytoca	E-BLSE	0.016	Susceptible (S)	S ≤ 2 mg/L, R > 2 mg/L (EUCAST 2024)
423	klebsiella pneumoniae	E-BLSE	0.38	Susceptible (S)	S ≤ 2 mg/L, R > 2 mg/L (EUCAST 2024)
1073	Escherichia coli	E-BLSE	0.38	Susceptible (S)	S ≤ 2 mg/L, R > 2 mg/L (EUCAST 2024)
842	Pantoea spp	E-BLSE	0.016	Susceptible (S)	S ≤ 2 mg/L, R > 2 mg/L (EUCAST 2024)
1393	Pantoea spp	E-BLSE	0.016	Susceptible (S)	S ≤ 2 mg/L, R > 2 mg/L (EUCAST 2024)
960	Pantoea spp	E-BLSE	0.016	Susceptible (S)	S ≤ 2 mg/L, R > 2 mg/L (EUCAST 2024)
3303	Proteus mirabilis	E-BLSE	0.094	Susceptible (S)	S ≤ 2 mg/L, R > 2 mg/L (EUCAST 2024)
889	Escherichia coli	E-BLSE	0.19	Susceptible (S)	S ≤ 2 mg/L, R > 2 mg/L (EUCAST 2024)
308	Escherichia coli	E-BLSE	0.016	Susceptible (S)	S ≤ 2 mg/L, R > 2 mg/L (EUCAST 2024)
831	Klebsiella oxytoca	E-BLSE	0.016	Susceptible (S)	S ≤ 2 mg/L, R > 2 mg/L (EUCAST 2024)
1346	Pantoea spp	E-BLSE	0.016	Susceptible (S)	S ≤ 2 mg/L, R > 2 mg/L (EUCAST 2024)
6	Klebsiella pneumoniae	CRE	1	Susceptible (S)	S ≤ 2 mg/L, R > 2 mg/L (EUCAST 2024)
443	Escherichia coli	E-BLSE	0.064	Susceptible (S)	S ≤ 2 mg/L, R > 2 mg/L (EUCAST 2024)
803	Escherichia coli	E-BLSE	0.016	Susceptible (S)	S ≤ 2 mg/L, R > 2 mg/L (EUCAST 2024)
1326	Pantoea spp	E-BLSE	0.016	Susceptible (S)	S ≤ 2 mg/L, R > 2 mg/L (EUCAST 2024)
719	Escherichia coli	E-BLSE	0.5	Susceptible (S)	S ≤ 2 mg/L, R > 2 mg/L (EUCAST 2024)
1086	Serratia odorifera	E-BLSE	0.016	Susceptible (S)	S ≤ 2 mg/L, R > 2 mg/L (EUCAST 2024)
1080	Klebsiella pneumoniae	E-BLSE	0.016	Susceptible (S)	S ≤ 2 mg/L, R > 2 mg/L (EUCAST 2024)
435	Escherichia coli	E-BLSE	0.38	Susceptible (S)	S ≤ 2 mg/L, R > 2 mg/L (EUCAST 2024)
354	Escherichia coli	E-BLSE	0.016	Susceptible (S)	S ≤ 2 mg/L, R > 2 mg/L (EUCAST 2024)
550	Escherichia coli	E-BLSE	0.016	Susceptible (S)	S ≤ 2 mg/L, R > 2 mg/L (EUCAST 2024)
137	Escherichia coli	E-BLSE	0.016	Susceptible (S)	S ≤ 2 mg/L, R > 2 mg/L (EUCAST 2024)
2380	Escherichia coli	CRE	0.38	Susceptible (S)	S ≤ 2 mg/L, R > 2 mg/L (EUCAST 2024)
276	Escherichia coli	E-BLSE	0.016	Susceptible (S)	S ≤ 2 mg/L, R > 2 mg/L (EUCAST 2024)
26	Escherichia coli	E-BLSE	0.016	Susceptible (S)	S ≤ 2 mg/L, R > 2 mg/L (EUCAST 2024)
54	Klebsiella pneumoniae	CRE	0.38	Susceptible (S)	S ≤ 2 mg/L, R > 2 mg/L (EUCAST 2024)
2065	Escherichia coli	CRE	0.016	Susceptible (S)	S ≤ 2 mg/L, R > 2 mg/L (EUCAST 2024)
318	Escherichia coli	E-BLSE	0.5	Susceptible (S)	S ≤ 2 mg/L, R > 2 mg/L (EUCAST 2024)
319	Escherichia coli	E-BLSE	0.5	Susceptible (S)	S ≤ 2 mg/L, R > 2 mg/L (EUCAST 2024)
320	Escherichia coli	E-BLSE	0.016	Susceptible (S)	S ≤ 2 mg/L, R > 2 mg/L (EUCAST 2024)
3379	Escherichia coli	E-BLSE	0.016	Susceptible (S)	S ≤ 2 mg/L, R > 2 mg/L (EUCAST 2024)
3352	Klebsiella pneumoniae	E-BLSE	0.047	Susceptible (S)	S ≤ 2 mg/L, R > 2 mg/L (EUCAST 2024)
3340	Klebsiella pneumoniae	E-BLSE	0.016	Susceptible (S)	S ≤ 2 mg/L, R > 2 mg/L (EUCAST 2024)
3472	Klebsiella pneumoniae	E-BLSE	0.016	Susceptible (S)	S ≤ 2 mg/L, R > 2 mg/L (EUCAST 2024)
3465	Escherichia coli	CRE	0.38	Susceptible (S)	S ≤ 2 mg/L, R > 2 mg/L (EUCAST 2024)
3492	Escherichia coli	E-BLSE	0.016	Susceptible (S)	S ≤ 2 mg/L, R > 2 mg/L (EUCAST 2024)
3486	Escherichia coli	E-BLSE	0.016	Susceptible (S)	S ≤ 2 mg/L, R > 2 mg/L (EUCAST 2024)
3483	Escherichia coli	CRE	0.38	Susceptible (S)	S ≤ 2 mg/L, R > 2 mg/L (EUCAST 2024)
333	Escherichia coli	E-BLSE	0.016	Susceptible (S)	S ≤ 2 mg/L, R > 2 mg/L (EUCAST 2024)
3466	Proteus mirabilis	E-BLSE	0.016	Susceptible (S)	S ≤ 2 mg/L, R > 2 mg/L (EUCAST 2024)
2967	Escherichia coli	E-BLSE	0.125	Susceptible (S)	S ≤ 2 mg/L, R > 2 mg/L (EUCAST 2024)
2274	Escherichia coli	E-BLSE	0.016	Susceptible (S)	S ≤ 2 mg/L, R > 2 mg/L (EUCAST 2024)
3186	Pseudomonas aeruginosa	CRPA	0.047	Susceptible (S)	S ≤ 2 mg/L, R > 2 mg/L (EUCAST 2024)
4782	Pseudomonas aeruginosa	CRPA	4	Resistant (R)	S ≤ 2 mg/L, R > 2 mg/L (EUCAST 2024)
2898	Klebsiella pneumoniae	E-BLSE	0.094	Susceptible (S)	S ≤ 2 mg/L, R > 2 mg/L (EUCAST 2024)
499	Proteus mirabilis	CRE	0.38	Susceptible (S)	S ≤ 2 mg/L, R > 2 mg/L (EUCAST 2024)
946	Acinetobacter baumannii	CRAB	0.38	Susceptible (S)	S ≤ 2 mg/L, R > 2 mg/L (EUCAST 2024)
959	Escherichia coli	CRE	0.38	Susceptible (S)	S ≤ 2 mg/L, R > 2 mg/L (EUCAST 2024)
1305	Acinetobacter baumannii	CRAB	0.38	Susceptible (S)	S ≤ 2 mg/L, R > 2 mg/L (EUCAST 2024)
2587	Pseudomonas aeruginosa	CRPA	0.064	Susceptible (S)	S ≤ 2 mg/L, R > 2 mg/L (EUCAST 2024)
3196	Acinetobacter baumannii	CRAB	0.38	Susceptible (S)	S ≤ 2 mg/L, R > 2 mg/L (EUCAST 2024)
3322	Acinetobacter baumannii	CRAB	0.38	Susceptible (S)	S ≤ 2 mg/L, R > 2 mg/L (EUCAST 2024)
3566	Acinetobacter baumannii	CRAB	0.38	Susceptible (S)	S ≤ 2 mg/L, R > 2 mg/L (EUCAST 2024)
4990	Escherichia coli	CRE	1.5	Susceptible (S)	S ≤ 2 mg/L, R > 2 mg/L (EUCAST 2024)
4991	Escherichia coli	CRE	0.38	Susceptible (S)	S ≤ 2 mg/L, R > 2 mg/L (EUCAST 2024)
102	Escherichia coli	E-BLSE	0.016	Susceptible (S)	S ≤ 2 mg/L, R > 2 mg/L (EUCAST 2024)
3080	Escherichia coli	E-BLSE	0.064	Susceptible (S)	S ≤ 2 mg/L, R > 2 mg/L (EUCAST 2024)
2473	Escherichia coli	E-BLSE	0.032	Susceptible (S)	S ≤ 2 mg/L, R > 2 mg/L (EUCAST 2024)
3275	Escherichia coli	E-BLSE	0.032	Susceptible (S)	S ≤ 2 mg/L, R > 2 mg/L (EUCAST 2024)
199	Escherichia coli	E-BLSE	0.032	Susceptible (S)	S ≤ 2 mg/L, R > 2 mg/L (EUCAST 2024)
2200	Escherichia coli	E-BLSE	0.032	Susceptible (S)	S ≤ 2 mg/L, R > 2 mg/L (EUCAST 2024)
513	Escherichia coli	E-BLSE	0.032	Susceptible (S)	S ≤ 2 mg/L, R > 2 mg/L (EUCAST 2024)
3443	Escherichia coli	E-BLSE	0.032	Susceptible (S)	S ≤ 2 mg/L, R > 2 mg/L (EUCAST 2024)
325	Klebsiella pneumoniae	E-BLSE	0.016	Susceptible (S)	S ≤ 2 mg/L, R > 2 mg/L (EUCAST 2024)
193	Pseudomonas aeruginosa	CRPA	0.75	Susceptible (S)	S ≤ 2 mg/L, R > 2 mg/L (EUCAST 2024)
3129	Klebsiella pneumoniae	CRE	0.5	Susceptible (S)	S ≤ 2 mg/L, R > 2 mg/L (EUCAST 2024)
2907	Escherichia coli	CRE	0.38	Susceptible (S)	S ≤ 2 mg/L, R > 2 mg/L (EUCAST 2024)
2284	Pantoea spp	E-BLSE	0.016	Susceptible (S)	S ≤ 2 mg/L, R > 2 mg/L (EUCAST 2024)
166	Klebsiella pneumoniae	CRE	0.38	Susceptible (S)	S ≤ 2 mg/L, R > 2 mg/L (EUCAST 2024)
22	Escherichia coli	E-BLSE	0.016	Susceptible (S)	S ≤ 2 mg/L, R > 2 mg/L (EUCAST 2024)
470	Escherichia coli	CRE	0.5	Susceptible (S)	S ≤ 2 mg/L, R > 2 mg/L (EUCAST 2024)
1628	Hafnia alvei	CRE	0.25	Susceptible (S)	S ≤ 2 mg/L, R > 2 mg/L (EUCAST 2024)
1409	Escherichia coli	CRE	0.094	Susceptible (S)	S ≤ 2 mg/L, R > 2 mg/L (EUCAST 2024)
22	Citrobacter spp	E-BLSE	0.016	Susceptible (S)	S ≤ 2 mg/L, R > 2 mg/L (EUCAST 2024)
239	Escherichia coli	E-BLSE	0.016	Susceptible (S)	S ≤ 2 mg/L, R > 2 mg/L (EUCAST 2024)
172	Escherichia coli	E-BLSE	0.016	Susceptible (S)	S ≤ 2 mg/L, R > 2 mg/L (EUCAST 2024)
18	Escherichia coli	E-BLSE	0.016	Susceptible (S)	S ≤ 2 mg/L, R > 2 mg/L (EUCAST 2024)
251	Klebsiella oxytoca	CRE	3	Resistant (R)	S ≤ 2 mg/L, R > 2 mg/L (EUCAST 2024)
262	Klebsiella pneumoniae	E-BLSE	0.016	Susceptible (S)	S ≤ 2 mg/L, R > 2 mg/L (EUCAST 2024)
291	Escherichia coli	CRE	2	Susceptible (S)	S ≤ 2 mg/L, R > 2 mg/L (EUCAST 2024)
1510	Serratia odorifera	E-BLSE	0.016	Susceptible (S)	S ≤ 2 mg/L, R > 2 mg/L (EUCAST 2024)
1521	Klebsiella pneumoniae	E-BLSE	0.016	Susceptible (S)	S ≤ 2 mg/L, R > 2 mg/L (EUCAST 2024)
87	Klebsiella pneumoniae	E-BLSE	0.19	Susceptible (S)	S ≤ 2 mg/L, R > 2 mg/L (EUCAST 2024)
141	Klebsiella pneumoniae	E-BLSE	0.016	Susceptible (S)	S ≤ 2 mg/L, R > 2 mg/L (EUCAST 2024)
65	Escherichia coli	E-BLSE	0.125	Susceptible (S)	S ≤ 2 mg/L, R > 2 mg/L (EUCAST 2024)
1512	Escherichia coli	E-BLSE	0.016	Susceptible (S)	S ≤ 2 mg/L, R > 2 mg/L (EUCAST 2024)
1514	Escherichia coli	E-BLSE	0.016	Susceptible (S)	S ≤ 2 mg/L, R > 2 mg/L (EUCAST 2024)
44	Escherichia coli	E-BLSE	0.047	Susceptible (S)	S ≤ 2 mg/L, R > 2 mg/L (EUCAST 2024)
241	Klebsiella pneumoniae	CRE	3	Resistant (R)	S ≤ 2 mg/L, R > 2 mg/L (EUCAST 2024)
376	Escherichia coli	E-BLSE	0.38	Susceptible (S)	S ≤ 2 mg/L, R > 2 mg/L (EUCAST 2024)
139	Escherichia coli	CRE	0.75	Susceptible (S)	S ≤ 2 mg/L, R > 2 mg/L (EUCAST 2024)
99	Escherichia coli	E-BLSE	0.016	Susceptible (S)	S ≤ 2 mg/L, R > 2 mg/L (EUCAST 2024)
463	Acinetobacter baumannii	CRAB	0.38	Susceptible (S)	S ≤ 2 mg/L, R > 2 mg/L (EUCAST 2024)
48	Escherichia coli	E-BLSE	0.016	Susceptible (S)	S ≤ 2 mg/L, R > 2 mg/L (EUCAST 2024)
1540	Escherichia coli	E-BLSE	0.016	Susceptible (S)	S ≤ 2 mg/L, R > 2 mg/L (EUCAST 2024)
432	Klebsiella oxytoca	E-BLSE	0.016	Susceptible (S)	S ≤ 2 mg/L, R > 2 mg/L (EUCAST 2024)
267	Escherichia coli	CRE	3	Resistant (R)	S ≤ 2 mg/L, R > 2 mg/L (EUCAST 2024)
320	Escherichia coli	E-BLSE	0.047	Susceptible (S)	S ≤ 2 mg/L, R > 2 mg/L (EUCAST 2024)
1394	Proteus mirabilis	E-BLSE	0.047	Susceptible (S)	S ≤ 2 mg/L, R > 2 mg/L (EUCAST 2024)
391	Klebsiella pneumoniae	CRE	0.19	Susceptible (S)	S ≤ 2 mg/L, R > 2 mg/L (EUCAST 2024)
182	Escherichia coli	E-BLSE	0.016	Susceptible (S)	S ≤ 2 mg/L, R > 2 mg/L (EUCAST 2024)
38	Escherichia coli	E-BLSE	0.016	Susceptible (S)	S ≤ 2 mg/L, R > 2 mg/L (EUCAST 2024)
397	Escherichia coli	E-BLSE	0.032	Susceptible (S)	S ≤ 2 mg/L, R > 2 mg/L (EUCAST 2024)
91	Escherichia coli	E-BLSE	0.032	Susceptible (S)	S ≤ 2 mg/L, R > 2 mg/L (EUCAST 2024)
355	Escherichia coli	E-BLSE	0.032	Susceptible (S)	S ≤ 2 mg/L, R > 2 mg/L (EUCAST 2024)
43	Escherichia coli	E-BLSE	0.19	Susceptible (S)	S ≤ 2 mg/L, R > 2 mg/L (EUCAST 2024)
1115	Escherichia coli	E-BLSE	0.19	Susceptible (S)	S ≤ 2 mg/L, R > 2 mg/L (EUCAST 2024)
1350	Escherichia coli	E-BLSE	0.016	Susceptible (S)	S ≤ 2 mg/L, R > 2 mg/L (EUCAST 2024)
1107	Escherichia coli	E-BLSE	0.016	Susceptible (S)	S ≤ 2 mg/L, R > 2 mg/L (EUCAST 2024)
40	Escherichia coli	CRE	0.38	Susceptible (S)	S ≤ 2 mg/L, R > 2 mg/L (EUCAST 2024)
1091	Pantoea spp	E-BLSE	0.5	Susceptible (S)	S ≤ 2 mg/L, R > 2 mg/L (EUCAST 2024)
248	Escherichia coli	E-BLSE	0.016	Susceptible (S)	S ≤ 2 mg/L, R > 2 mg/L (EUCAST 2024)
1366	Escherichia coli	E-BLSE	0.016	Susceptible (S)	S ≤ 2 mg/L, R > 2 mg/L (EUCAST 2024)
488	Escherichia coli	E-BLSE	0.047	Susceptible (S)	S ≤ 2 mg/L, R > 2 mg/L (EUCAST 2024)
1363	Enterobacter spp	E-BLSE	0.047	Susceptible (S)	S ≤ 2 mg/L, R > 2 mg/L (EUCAST 2024)
448	Escherichia coli	E-BLSE	0.016	Susceptible (S)	S ≤ 2 mg/L, R > 2 mg/L (EUCAST 2024)
32	Escherichia coli	E-BLSE	0.016	Susceptible (S)	S ≤ 2 mg/L, R > 2 mg/L (EUCAST 2024)
491	Klebsiella pneumoniae	E-BLSE	0.016	Susceptible (S)	S ≤ 2 mg/L, R > 2 mg/L (EUCAST 2024)
462	Klebsiella oxytoca	E-BLSE	0.016	Susceptible (S)	S ≤ 2 mg/L, R > 2 mg/L (EUCAST 2024)
435	Escherichia coli	E-BLSE	0.047	Susceptible (S)	S ≤ 2 mg/L, R > 2 mg/L (EUCAST 2024)
479	Escherichia coli	E-BLSE	0.016	Susceptible (S)	S ≤ 2 mg/L, R > 2 mg/L (EUCAST 2024)
444	Escherichia coli	E-BLSE	0.016	Susceptible (S)	S ≤ 2 mg/L, R > 2 mg/L (EUCAST 2024)
1217	Escherichia coli	E-BLSE	0.016	Susceptible (S)	S ≤ 2 mg/L, R > 2 mg/L (EUCAST 2024)
1218	Escherichia coli	E-BLSE	0.016	Susceptible (S)	S ≤ 2 mg/L, R > 2 mg/L (EUCAST 2024)
1192	Klebsiella pneumoniae	E-BLSE	0.016	Susceptible (S)	S ≤ 2 mg/L, R > 2 mg/L (EUCAST 2024)
322	Pantoea spp	E-BLSE	0.016	Susceptible (S)	S ≤ 2 mg/L, R > 2 mg/L (EUCAST 2024)
1104	Klebsiella pneumoniae	E-BLSE	0.016	Susceptible (S)	S ≤ 2 mg/L, R > 2 mg/L (EUCAST 2024)
318	Escherichia coli	E-BLSE	0.094	Susceptible (S)	S ≤ 2 mg/L, R > 2 mg/L (EUCAST 2024)
1389	Escherichia coli	E-BLSE	0.19	Susceptible (S)	S ≤ 2 mg/L, R > 2 mg/L (EUCAST 2024)
1353	Enterobacter spp	E-BLSE	0.016	Susceptible (S)	S ≤ 2 mg/L, R > 2 mg/L (EUCAST 2024)
112	Escherichia coli	E-BLSE	0.016	Susceptible (S)	S ≤ 2 mg/L, R > 2 mg/L (EUCAST 2024)
1352	Klebsiella pneumoniae	E-BLSE	0.016	Susceptible (S)	S ≤ 2 mg/L, R > 2 mg/L (EUCAST 2024)
1199	Klebsiella pneumoniae	CRE	0.38	Susceptible (S)	S ≤ 2 mg/L, R > 2 mg/L (EUCAST 2024)
1425	Escherichia coli	E-BLSE	0.016	Susceptible (S)	S ≤ 2 mg/L, R > 2 mg/L (EUCAST 2024)
1434	Escherichia coli	E-BLSE	0.016	Susceptible (S)	S ≤ 2 mg/L, R > 2 mg/L (EUCAST 2024)
1438	Klebsiella pneumoniae	E-BLSE	0.38	Susceptible (S)	S ≤ 2 mg/L, R > 2 mg/L (EUCAST 2024)
1444	Citrobacter spp	E-BLSE	0.38	Susceptible (S)	S ≤ 2 mg/L, R > 2 mg/L (EUCAST 2024)
1220	Escherichia coli	CRE	0.19	Susceptible (S)	S ≤ 2 mg/L, R > 2 mg/L (EUCAST 2024)
1929	Pseudomonas aeruginosa	CRPA	1	Susceptible (S)	S ≤ 2 mg/L, R > 2 mg/L (EUCAST 2024)
1955	Escherichia coli	E-BLSE	0.125	Susceptible (S)	S ≤ 2 mg/L, R > 2 mg/L (EUCAST 2024)
1957	Escherichia coli	E-BLSE	0.023	Susceptible (S)	S ≤ 2 mg/L, R > 2 mg/L (EUCAST 2024)
1934	Enterobacter spp	E-BLSE	0.064	Susceptible (S)	S ≤ 2 mg/L, R > 2 mg/L (EUCAST 2024)
1932	Klebsiella oxytoca	E-BLSE	1	Susceptible (S)	S ≤ 2 mg/L, R > 2 mg/L (EUCAST 2024)
1982	Citrobacter spp	E-BLSE	0.75	Susceptible (S)	S ≤ 2 mg/L, R > 2 mg/L (EUCAST 2024)
1978	Escherichia coli	E-BLSE	0.023	Susceptible (S)	S ≤ 2 mg/L, R > 2 mg/L (EUCAST 2024)
183	Escherichia coli	E-BLSE	0.016	Susceptible (S)	S ≤ 2 mg/L, R > 2 mg/L (EUCAST 2024)
185	Klebsiella pneumoniae	E-BLSE	0.016	Susceptible (S)	S ≤ 2 mg/L, R > 2 mg/L (EUCAST 2024)
11	Citrobacter spp	E-BLSE	0.016	Susceptible (S)	S ≤ 2 mg/L, R > 2 mg/L (EUCAST 2024)
55	Escherichia coli	E-BLSE	0.016	Susceptible (S)	S ≤ 2 mg/L, R > 2 mg/L (EUCAST 2024)
1581	Escherichia coli	E-BLSE	0.047	Susceptible (S)	S ≤ 2 mg/L, R > 2 mg/L (EUCAST 2024)
12	Escherichia coli	CRE	0.19	Susceptible (S)	S ≤ 2 mg/L, R > 2 mg/L (EUCAST 2024)
1005	Escherichia coli	E-BLSE	0.016	Susceptible (S)	S ≤ 2 mg/L, R > 2 mg/L (EUCAST 2024)
1025	Klebsiella pneumoniae	E-BLSE	0.016	Susceptible (S)	S ≤ 2 mg/L, R > 2 mg/L (EUCAST 2024)
917	Escherichia coli	E-BLSE	0.016	Susceptible (S)	S ≤ 2 mg/L, R > 2 mg/L (EUCAST 2024)
1734	Klebsiella pneumoniae	E-BLSE	0.016	Susceptible (S)	S ≤ 2 mg/L, R > 2 mg/L (EUCAST 2024)
1768	Klebsiella pneumoniae	E-BLSE	0.032	Susceptible (S)	S ≤ 2 mg/L, R > 2 mg/L (EUCAST 2024)
1733	Escherichia coli	E-BLSE	0.016	Susceptible (S)	S ≤ 2 mg/L, R > 2 mg/L (EUCAST 2024)
1634	Escherichia coli	E-BLSE	1	Susceptible (S)	S ≤ 2 mg/L, R > 2 mg/L (EUCAST 2024)
1792	Klebsiella oxytoca	E-BLSE	0.016	Susceptible (S)	S ≤ 2 mg/L, R > 2 mg/L (EUCAST 2024)
1827	Aeromonas hydrophila	CRE	0.75	Susceptible (S)	S ≤ 2 mg/L, R > 2 mg/L (EUCAST 2024)
1760	Escherichia coli	E-BLSE	0.016	Susceptible (S)	S ≤ 2 mg/L, R > 2 mg/L (EUCAST 2024)
1791	Escherichia coli	E-BLSE	0.75	Susceptible (S)	S ≤ 2 mg/L, R > 2 mg/L (EUCAST 2024)
1705	Escherichia coli	E-BLSE	0.016	Susceptible (S)	S ≤ 2 mg/L, R > 2 mg/L (EUCAST 2024)
1741	Klebsiella pneumoniae	CRE	0.25	Susceptible (S)	S ≤ 2 mg/L, R > 2 mg/L (EUCAST 2024)
1726	Escherichia coli	E-BLSE	0.016	Susceptible (S)	S ≤ 2 mg/L, R > 2 mg/L (EUCAST 2024)
1794	Acinetobacter baumannii	CRAB	0.38	Susceptible (S)	S ≤ 2 mg/L, R > 2 mg/L (EUCAST 2024)
169	Escherichia coli	E-BLSE	0.064	Susceptible (S)	S ≤ 2 mg/L, R > 2 mg/L (EUCAST 2024)
1405	Acinetobacter baumannii	CRAB	0.38	Susceptible (S)	S ≤ 2 mg/L, R > 2 mg/L (EUCAST 2024)
1757	Escherichia coli	CRE	256	Resistant (R)	S ≤ 2 mg/L, R > 2 mg/L (EUCAST 2024)
1612	Escherichia coli	E-BLSE	0.016	Susceptible (S)	S ≤ 2 mg/L, R > 2 mg/L (EUCAST 2024)
17	Escherichia coli	E-BLSE	0.016	Susceptible (S)	S ≤ 2 mg/L, R > 2 mg/L (EUCAST 2024)
1363	Enterobacter spp	E-BLSE	0.016	Susceptible (S)	S ≤ 2 mg/L, R > 2 mg/L (EUCAST 2024)
1434	Escherichia coli	E-BLSE	0.032	Susceptible (S)	S ≤ 2 mg/L, R > 2 mg/L (EUCAST 2024)
1428	Escherichia coli	CRE	256	Resistant (R)	S ≤ 2 mg/L, R > 2 mg/L (EUCAST 2024)
1540	Escherichia coli	E-BLSE	0.064	Susceptible (S)	S ≤ 2 mg/L, R > 2 mg/L (EUCAST 2024)
1659	Escherichia coli	E-BLSE	0.19	Susceptible (S)	S ≤ 2 mg/L, R > 2 mg/L (EUCAST 2024)
1591	Escherichia coli	E-BLSE	0.016	Susceptible (S)	S ≤ 2 mg/L, R > 2 mg/L (EUCAST 2024)
112	Escherichia coli	E-BLSE	0.94	Susceptible (S)	S ≤ 2 mg/L, R > 2 mg/L (EUCAST 2024)
1406	Escherichia coli	E-BLSE	0.25	Susceptible (S)	S ≤ 2 mg/L, R > 2 mg/L (EUCAST 2024)
1552	Escherichia coli	CRE	1.5	Susceptible (S)	S ≤ 2 mg/L, R > 2 mg/L (EUCAST 2024)
1366	Escherichia coli	E-BLSE	0.016	Susceptible (S)	S ≤ 2 mg/L, R > 2 mg/L (EUCAST 2024)
1565	Escherichia coli	E-BLSE	0.016	Susceptible (S)	S ≤ 2 mg/L, R > 2 mg/L (EUCAST 2024)
1658	Serratia odorifera	E-BLSE	0.016	Susceptible (S)	S ≤ 2 mg/L, R > 2 mg/L (EUCAST 2024)
1425	Escherichia coli	E-BLSE	0.016	Susceptible (S)	S ≤ 2 mg/L, R > 2 mg/L (EUCAST 2024)
1551	Serratia marcescens	E-BLSE	0.016	Susceptible (S)	S ≤ 2 mg/L, R > 2 mg/L (EUCAST 2024)
1401	Escherichia coli	CRE	0.5	Susceptible (S)	S ≤ 2 mg/L, R > 2 mg/L (EUCAST 2024)
1560	Klebsiella oxytoca	E-BLSE	0.38	Susceptible (S)	S ≤ 2 mg/L, R > 2 mg/L (EUCAST 2024)
132	Serratia odorifera	E-BLSE	0.016	Susceptible (S)	S ≤ 2 mg/L, R > 2 mg/L (EUCAST 2024)
1512	Escherichia coli	E-BLSE	0.016	Susceptible (S)	S ≤ 2 mg/L, R > 2 mg/L (EUCAST 2024)
2121	Escherichia coli	CRE	0.38	Susceptible (S)	S ≤ 2 mg/L, R > 2 mg/L (EUCAST 2024)
2227	Acinetobacter baumannii	CRAB	1.5	Susceptible (S)	S ≤ 2 mg/L, R > 2 mg/L (EUCAST 2024)
2140	Escherichia coli	E-BLSE	0.016	Susceptible (S)	S ≤ 2 mg/L, R > 2 mg/L (EUCAST 2024)
2143	Escherichia coli	E-BLSE	0.016	Susceptible (S)	S ≤ 2 mg/L, R > 2 mg/L (EUCAST 2024)
2147	Escherichia coli	E-BLSE	0.016	Susceptible (S)	S ≤ 2 mg/L, R > 2 mg/L (EUCAST 2024)
2155	Escherichia coli	E-BLSE	0.016	Susceptible (S)	S ≤ 2 mg/L, R > 2 mg/L (EUCAST 2024)
2202	Escherichia coli	E-BLSE	0.016	Susceptible (S)	S ≤ 2 mg/L, R > 2 mg/L (EUCAST 2024)
2199	Escherichia coli	E-BLSE	0.016	Susceptible (S)	S ≤ 2 mg/L, R > 2 mg/L (EUCAST 2024)
2191	Escherichia coli	E-BLSE	0.016	Susceptible (S)	S ≤ 2 mg/L, R > 2 mg/L (EUCAST 2024)
2232	Acinetobacter baumannii	CRAB	0.38	Susceptible (S)	S ≤ 2 mg/L, R > 2 mg/L (EUCAST 2024)
2242	Escherichia coli	CRE	1	Susceptible (S)	S ≤ 2 mg/L, R > 2 mg/L (EUCAST 2024)
204	Escherichia coli	E-BLSE	0.016	Susceptible (S)	S ≤ 2 mg/L, R > 2 mg/L (EUCAST 2024)
200	Klebsiella pneumoniae	E-BLSE	0.023	Susceptible (S)	S ≤ 2 mg/L, R > 2 mg/L (EUCAST 2024)
2247	Escherichia coli	E-BLSE	0.016	Susceptible (S)	S ≤ 2 mg/L, R > 2 mg/L (EUCAST 2024)
2245	Klebsiella oxytoca	CRE	0.75	Susceptible (S)	S ≤ 2 mg/L, R > 2 mg/L (EUCAST 2024)
2225	Escherichia coli	CRE	0.25	Susceptible (S)	S ≤ 2 mg/L, R > 2 mg/L (EUCAST 2024)
206	Escherichia coli	E-BLSE	0.016	Susceptible (S)	S ≤ 2 mg/L, R > 2 mg/L (EUCAST 2024)
2269	Escherichia coli	CRE	1.5	Susceptible (S)	S ≤ 2 mg/L, R > 2 mg/L (EUCAST 2024)
2288	Escherichia coli	E-BLSE	0.047	Susceptible (S)	S ≤ 2 mg/L, R > 2 mg/L (EUCAST 2024)
2319	Escherichia coli	CRE	0.125	Susceptible (S)	S ≤ 2 mg/L, R > 2 mg/L (EUCAST 2024)
2270	Klebsiella pneumoniae	E-BLSE	0.016	Susceptible (S)	S ≤ 2 mg/L, R > 2 mg/L (EUCAST 2024)
2230	Escherichia coli	E-BLSE	0.016	Susceptible (S)	S ≤ 2 mg/L, R > 2 mg/L (EUCAST 2024)
2282	Pseudomonas aeruginosa	CRPA	0.75	Susceptible (S)	S ≤ 2 mg/L, R > 2 mg/L (EUCAST 2024)
2277	Escherichia coli	CRE	2	Susceptible (S)	S ≤ 2 mg/L, R > 2 mg/L (EUCAST 2024)
2289	Escherichia coli	E-BLSE	0.064	Susceptible (S)	S ≤ 2 mg/L, R > 2 mg/L (EUCAST 2024)
2323	Escherichia coli	E-BLSE	0.25	Susceptible (S)	S ≤ 2 mg/L, R > 2 mg/L (EUCAST 2024)
2235	Escherichia coli	E-BLSE	0.047	Susceptible (S)	S ≤ 2 mg/L, R > 2 mg/L (EUCAST 2024)
2040	Escherichia coli	E-BLSE	0.016	Susceptible (S)	S ≤ 2 mg/L, R > 2 mg/L (EUCAST 2024)
2095	Escherichia coli	E-BLSE	0.016	Susceptible (S)	S ≤ 2 mg/L, R > 2 mg/L (EUCAST 2024)
2063	Klebsiella pneumoniae	E-BLSE	0.016	Susceptible (S)	S ≤ 2 mg/L, R > 2 mg/L (EUCAST 2024)
2055	Klebsiella pneumoniae	E-BLSE	0.016	Susceptible (S)	S ≤ 2 mg/L, R > 2 mg/L (EUCAST 2024)
2051	Escherichia coli	E-BLSE	0.016	Susceptible (S)	S ≤ 2 mg/L, R > 2 mg/L (EUCAST 2024)
2540	Serratia odorifera	E-BLSE	0.016	Susceptible (S)	S ≤ 2 mg/L, R > 2 mg/L (EUCAST 2024)
2560	Citrobacter spp	CRE	1	Susceptible (S)	S ≤ 2 mg/L, R > 2 mg/L (EUCAST 2024)
2501	Klebsiella oxytoca	CRE	0.125	Susceptible (S)	S ≤ 2 mg/L, R > 2 mg/L (EUCAST 2024)
2385	Escherichia coli	CRE	0.047	Susceptible (S)	S ≤ 2 mg/L, R > 2 mg/L (EUCAST 2024)
25	Escherichia coli	CRE	4	Resistant (R)	S ≤ 2 mg/L, R > 2 mg/L (EUCAST 2024)
2495	Escherichia coli	CRE	0.064	Susceptible (S)	S ≤ 2 mg/L, R > 2 mg/L (EUCAST 2024)
2641	Escherichia coli	CRE	1.5	Susceptible (S)	S ≤ 2 mg/L, R > 2 mg/L (EUCAST 2024)
2377	Escherichia coli	CRE	1	Susceptible (S)	S ≤ 2 mg/L, R > 2 mg/L (EUCAST 2024)
2652	Serratia odorifera	CRE	0.38	Susceptible (S)	S ≤ 2 mg/L, R > 2 mg/L (EUCAST 2024)
35	Escherichia coli	CRE	0.75	Susceptible (S)	S ≤ 2 mg/L, R > 2 mg/L (EUCAST 2024)
2670	Escherichia coli	CRE	0.38	Susceptible (S)	S ≤ 2 mg/L, R > 2 mg/L (EUCAST 2024)
249	Escherichia coli	E-BLSE	0.016	Susceptible (S)	S ≤ 2 mg/L, R > 2 mg/L (EUCAST 2024)
2685	Escherichia coli	CRE	0.19	Susceptible (S)	S ≤ 2 mg/L, R > 2 mg/L (EUCAST 2024)
246	Morganella morganii	CRE	0.023	Susceptible (S)	S ≤ 2 mg/L, R > 2 mg/L (EUCAST 2024)
2773	Pantoea spp	E-BLSE	0.064	Susceptible (S)	S ≤ 2 mg/L, R > 2 mg/L (EUCAST 2024)
2764	Citrobacter spp	E-BLSE	0.032	Susceptible (S)	S ≤ 2 mg/L, R > 2 mg/L (EUCAST 2024)
2676	Escherichia coli	E-BLSE	0.064	Susceptible (S)	S ≤ 2 mg/L, R > 2 mg/L (EUCAST 2024)
2732	Escherichia coli	E-BLSE	0.064	Susceptible (S)	S ≤ 2 mg/L, R > 2 mg/L (EUCAST 2024)
2751	Escherichia coli	E-BLSE	0.016	Susceptible (S)	S ≤ 2 mg/L, R > 2 mg/L (EUCAST 2024)
2681	Escherichia coli	E-BLSE	0.032	Susceptible (S)	S ≤ 2 mg/L, R > 2 mg/L (EUCAST 2024)
2711	Escherichia coli	CRE	0.75	Susceptible (S)	S ≤ 2 mg/L, R > 2 mg/L (EUCAST 2024)
