# Supplementary material
Source: Research Square preprint supplement (doi:10.21203/rs.3.rs-9998917/v1)
Supplement: Supplementary file 1 [file f3f66e774b0fdafb3a24af93.pdf]

Supplementary Table 1: Summary of primers and probe sets used in this study (F= Forward Primer; R = Reverse Primer)

| Primer set | Target | Primer/probe name | Sequence (5' to 3')                 | Amplicon size (bp) | References                                     |
|------------|--------|-------------------|-------------------------------------|--------------------|------------------------------------------------|
| 1          | OXA-48 | OXA48_RT_F        | TCTTAAACGGGCGAACCAAG                | 125                | Al Bayssari Antimicrob. Agents Chemother. 2014 |
|            |        | OXA48_RT_R        | GCGTCTGTCCATCCCCTTA                 |                    |                                                |
|            |        | OXA48_RT_Probe    | AGCTTGATCGCCCTCGATTTGG              |                    |                                                |
| 2          | NDM    | NDM_RT_F          | GCGCAACACAGCCTGACTTT                | 155                | Diene, S.M, Int. J. Antimicrob. Agents 2011    |
|            |        | NDM_RT_R          | CAGCCACCAAAAAGCGATGTC               |                    |                                                |
|            |        | NDM_RT_Probe      | CAACCGCGCCCAACTTTGGC                |                    |                                                |
| 3          | KPC    | KPC-F             | GATACCACGTTCCGTCTGGA                | 180                | Mathlouthi, N. . J. Infect. Dev. Ctries. 2016  |
|            |        | KPC-R             | GGTCGTGTTTCCCTTTAGCC                |                    |                                                |
|            |        | KPC-Probe         | CGCGCGCCGTGACGGAAAGC                |                    |                                                |
| 4          | VIM    | VIM-F             | CACAGYGGCMCTTCTCGCGGAGA             | 132                | Al Bayssari Antimicrob. Agents Chemother. 2014 |
|            |        | VIM-R             | GCGTACGTYGCCACYCCAGCC               |                    |                                                |
|            |        | VIM-Probe         | AGTCTCCACGCACTTTCATGACGACCGCGTCGGCG |                    |                                                |
