# Supplementary material
Source: Research Square preprint supplement (doi:10.21203/rs.3.rs-9998917/v1)
Supplement: Supplementary file 2 [file 57baccf5d08fbef9b16a08de.xlsx]

## Sheet: Sheet1
Registration_number	Age_years	Age_group	Sex	Specimen_type	Origin	Department	Bacterial_species	Resistance_phenotype	KPC	VIM	NDM	OXA_48	Combined_genes	Meropenem	Amikacin	Gentamicin	Ciprofloxacin	Levofloxacin	Nitrofurantoin	Trimethoprim_sulfamethoxazole	Fosfomycin	Eravacycline	Tigecycline	Ceftazidime_avibactam
293	26	< 40 years	Male	Urine	Outpatient		Escherichia coli	CRE	Not detected	Not detected	Not detected	Not detected	Not detected	Resistant	Susceptible	Susceptible	Resistant	Resistant	Resistant	Resistant	Susceptible	Susceptible	Susceptible	Susceptible
223	68	≥ 40 years	Male	Urine	Inpatient	Medical	Pantoea spp	E-BLSE	Not detected	Not detected	Not detected	Not detected	Not detected	Susceptible	Susceptible	Susceptible	Susceptible	Susceptible	Susceptible	Resistant	Susceptible	Susceptible	Susceptible	Susceptible
3377	24	< 40 years	Female	Urine	Inpatient	Medical	Klebsiella pneumoniae	E-BLSE	Not detected	Not detected	Not detected	Not detected	Not detected	Susceptible	Susceptible	Susceptible	Susceptible	Susceptible	Susceptible	Resistant	Susceptible	Susceptible	Susceptible	Susceptible
3378	40	≥ 40 years	Male	Urine	Inpatient	Medical	Klebsiella oxytoca	E-BLSE	Not detected	Not detected	Not detected	Not detected	Not detected	Susceptible	Susceptible	Resistant	Susceptible	Susceptible	Resistant	Resistant	Susceptible	Susceptible	Susceptible	Susceptible
2805	75	≥ 40 years	Male	Urine	Inpatient	Medical	Escherichia coli	E-BLSE	Not detected	Not detected	Not detected	Not detected	Not detected	Susceptible	Resistant	Susceptible	Resistant	Resistant	Susceptible	Resistant	Susceptible	Susceptible	Susceptible	Susceptible
6	50	≥ 40 years	Female	Pus	Inpatient	Medical	Pseudomonas aeruginosa	CRPA	Not detected	Detected	Not detected	Not detected	VIM	Resistant	Resistant		Resistant	Resistant		Resistant		Resistant	Resistant	Susceptible
201	20	< 40 years	Male	Pus	Inpatient	Surgical	Proteus mirabilis	E-BLSE	Not detected	Not detected	Not detected	Not detected	Not detected	Susceptible	Resistant	Resistant	Resistant	Resistant		Resistant		Susceptible	Susceptible	Susceptible
3778	77	≥ 40 years	Male	Urine	Inpatient	Medical	Klebsiella oxytoca	CRE	Not detected	Not detected	Detected	Not detected	NDM	Resistant	Susceptible	Resistant	Susceptible	Susceptible	Resistant	Resistant	Resistant	Susceptible	Susceptible	Susceptible
477	74	≥ 40 years	Male	Urine	Inpatient	Medical	Escherichia coli	CRE	Not detected	Not detected	Not detected	Not detected	Not detected	Resistant	Resistant	Resistant	Resistant	Resistant	Susceptible	Resistant	Susceptible	Susceptible	Susceptible	Susceptible
470	66	≥ 40 years	Male	Urine	Inpatient	Medical	Escherichia coli	CRE	Not detected	Not detected	Not detected	Not detected	Not detected	Resistant	Resistant	Resistant	Resistant	Resistant	Susceptible	Resistant	Susceptible	Susceptible	Susceptible	Susceptible
3635	60	≥ 40 years	Male	Urine	Outpatient		Escherichia coli	CRE	Not detected	Detected	Detected	Detected	VIM+NDM+OXA-48	Resistant	Susceptible	Resistant	Resistant	Resistant	Susceptible	Resistant	Susceptible	Susceptible	Susceptible	Resistant
15	35	< 40 years	Male	Urine	Outpatient		Klebsiella oxytoca	E-BLSE	Not detected	Not detected	Not detected	Not detected	Not detected	Susceptible	Susceptible	Resistant	Resistant	Resistant	Susceptible	Resistant	Susceptible	Susceptible	Susceptible	Susceptible
2172	44	≥ 40 years	Male	Urine	Inpatient	Medical	Pseudomonas aeruginosa	CRPA	Not detected	Not detected	Not detected	Not detected	Not detected	Resistant	Susceptible		Resistant	Resistant		Resistant	Resistant	Resistant	Resistant	Resistant
2288	62	≥ 40 years	Male	Urine	Outpatient		Pseudomonas aeruginosa	CRPA	Not detected	Not detected	Not detected	Not detected	Not detected	Resistant	Susceptible		Resistant	Resistant		Resistant	Resistant	Resistant	Resistant	Susceptible
554	44	≥ 40 years	Male	Urine	Outpatient		Pseudomonas aeruginosa	CRPA	Not detected	Not detected	Not detected	Not detected	Not detected	Resistant	Resistant		Resistant	Resistant		Resistant	Resistant	Resistant	Resistant	Resistant
4887	44	≥ 40 years	Male	Urine	Inpatient	Medical	Pseudomonas aeruginosa	CRPA	Not detected	Not detected	Not detected	Not detected	Not detected	Resistant	Resistant		Resistant	Resistant		Resistant	Susceptible	Resistant	Resistant	Susceptible
236	44	≥ 40 years	Male	Urine	Inpatient	Medical	Pseudomonas aeruginosa	CRPA	Not detected	Not detected	Not detected	Not detected	Not detected	Resistant	Resistant		Resistant	Resistant		Resistant	Resistant	Resistant	Resistant	Susceptible
2968	30	< 40 years	Female	Urine	Inpatient	Medical	Escherichia coli	E-BLSE	Not detected	Not detected	Not detected	Not detected	Not detected	Susceptible	Susceptible	Susceptible	Susceptible	Susceptible	Susceptible	Resistant	Susceptible	Susceptible	Susceptible	Susceptible
2907	17	< 40 years	Male	Urine	Outpatient		Escherichia coli	E-BLSE	Not detected	Not detected	Not detected	Not detected	Not detected	Susceptible	Susceptible	Susceptible	Resistant	Resistant	Susceptible	Resistant	Susceptible	Susceptible	Resistant	Susceptible
2899	65	≥ 40 years	Male	Urine	Outpatient		Escherichia coli	E-BLSE	Not detected	Not detected	Not detected	Not detected	Not detected	Susceptible	Susceptible	Resistant	Resistant	Resistant	Susceptible	Resistant	Susceptible	Susceptible	Susceptible	Susceptible
1852	75	≥ 40 years	Male	Urine	Inpatient	Medical	Pantoea spp	E-BLSE	Not detected	Not detected	Not detected	Not detected	Not detected	Susceptible	Susceptible	Resistant	Resistant	Resistant	Susceptible	Resistant	Susceptible	Susceptible	Susceptible	Susceptible
2110	86	≥ 40 years	Male	Urine	Outpatient		Escherichia coli	E-BLSE	Not detected	Not detected	Not detected	Not detected	Not detected	Susceptible	Susceptible	Susceptible	Resistant	Resistant	Susceptible	Resistant	Susceptible	Susceptible	Susceptible	Susceptible
2260	74	≥ 40 years	Male	Urine	Inpatient	Medical	Escherichia coli	E-BLSE	Not detected	Not detected	Not detected	Not detected	Not detected	Susceptible	Susceptible	Susceptible	Resistant	Resistant	Susceptible	Resistant	Susceptible	Susceptible	Susceptible	Susceptible
2142	3	< 40 years	Male	Urine	Inpatient	Medical	Klebsiella pneumoniae	E-BLSE	Not detected	Not detected	Not detected	Not detected	Not detected	Susceptible	Susceptible	Resistant	Resistant	Resistant	Susceptible	Resistant	Resistant	Susceptible	Susceptible	Susceptible
2207	28	< 40 years	Male	Urine	Outpatient		Salmonella spp	E-BLSE	Not detected	Not detected	Not detected	Not detected	Not detected	Susceptible	Susceptible	Resistant	Susceptible	Susceptible	Susceptible	Resistant	Susceptible	Susceptible	Susceptible	Susceptible
2216	15	< 40 years	Male	Urine	Outpatient		Salmonella spp	E-BLSE	Not detected	Not detected	Not detected	Not detected	Not detected	Susceptible	Susceptible	Susceptible	Susceptible	Susceptible	Susceptible	Resistant	Susceptible	Susceptible	Susceptible	Susceptible
2229	47	≥ 40 years	Male	Urine	Inpatient	Medical	Escherichia coli	E-BLSE	Not detected	Not detected	Not detected	Not detected	Not detected	Susceptible	Susceptible	Resistant	Resistant	Resistant	Resistant	Resistant	Resistant	Susceptible	Susceptible	Susceptible
2884	58	≥ 40 years	Female	Urine	Inpatient	Medical	Escherichia coli	E-BLSE	Not detected	Not detected	Not detected	Not detected	Not detected	Susceptible	Susceptible	Resistant	Resistant	Resistant	Resistant	Resistant	Resistant	Susceptible	Susceptible	Susceptible
1932	74	≥ 40 years	Male	Urine	Inpatient	Medical	Escherichia coli	E-BLSE	Not detected	Not detected	Not detected	Not detected	Not detected	Susceptible	Resistant	Resistant	Resistant	Resistant	Resistant	Resistant	Resistant	Susceptible	Susceptible	Susceptible
2224	67	≥ 40 years	Male	Urine	Inpatient	Medical	Escherichia coli	E-BLSE	Not detected	Not detected	Not detected	Not detected	Not detected	Susceptible	Susceptible	Resistant	Resistant	Resistant	Resistant	Resistant	Susceptible	Susceptible	Susceptible	Susceptible
2158	57	≥ 40 years	Female	Urine	Inpatient	Medical	Escherichia coli	E-BLSE	Not detected	Not detected	Not detected	Not detected	Not detected	Susceptible	Susceptible	Resistant	Susceptible	Susceptible	Resistant	Resistant	Susceptible	Susceptible	Susceptible	Susceptible
2243	2.83	< 40 years	Male	Urine	Inpatient	Surgical	Klebsiella pneumoniae	E-BLSE	Not detected	Not detected	Not detected	Not detected	Not detected	Susceptible	Susceptible	Resistant	Resistant	Resistant	Resistant	Resistant	Resistant	Susceptible	Susceptible	Susceptible
2268	87	≥ 40 years	Male	Urine	Outpatient		Serratia odorifera	E-BLSE	Not detected	Not detected	Not detected	Not detected	Not detected	Susceptible	Susceptible	Susceptible	Resistant	Resistant	Resistant	Resistant	Susceptible	Susceptible	Susceptible	Susceptible
1857	20	< 40 years	Female	Urine	Outpatient		Escherichia coli	E-BLSE	Not detected	Not detected	Not detected	Not detected	Not detected	Susceptible	Susceptible	Susceptible	Resistant	Resistant	Susceptible	Resistant	Susceptible	Susceptible	Susceptible	Susceptible
1998	20	< 40 years	Female	Urine	Inpatient	Emergencies and ICU	Escherichia coli	E-BLSE	Not detected	Not detected	Not detected	Not detected	Not detected	Susceptible	Susceptible	Resistant	Resistant	Resistant	Resistant	Resistant	Resistant	Susceptible	Susceptible	Susceptible
2131	35	< 40 years	Female	Urine	Inpatient	Medical	Klebsiella pneumoniae	E-BLSE	Not detected	Not detected	Not detected	Not detected	Not detected	Susceptible	Susceptible	Resistant	Resistant	Resistant	Resistant	Resistant	Resistant	Susceptible	Susceptible	Susceptible
2619	23	< 40 years	Male	Urine	Inpatient	Medical	Pantoea spp	E-BLSE	Not detected	Not detected	Not detected	Not detected	Not detected	Susceptible	Susceptible	Resistant	Resistant	Resistant	Resistant	Resistant	Susceptible	Susceptible	Susceptible	Susceptible
2193	14	< 40 years	Female	Urine	Outpatient		Escherichia coli	E-BLSE	Not detected	Not detected	Not detected	Not detected	Not detected	Susceptible	Susceptible	Susceptible	Resistant	Resistant	Resistant	Resistant	Susceptible	Susceptible	Susceptible	Resistant
2205	68	≥ 40 years	Female	Urine	Inpatient	Medical	Escherichia coli	E-BLSE	Not detected	Not detected	Not detected	Not detected	Not detected	Susceptible	Susceptible	Resistant	Resistant	Resistant	Susceptible	Resistant	Susceptible	Susceptible	Susceptible	Susceptible
2426	26	< 40 years	Male	Urine	Outpatient		Escherichia coli	E-BLSE	Not detected	Not detected	Not detected	Not detected	Not detected	Susceptible	Susceptible	Resistant	Resistant	Resistant	Susceptible	Resistant	Susceptible	Susceptible	Susceptible	Susceptible
2446	9	< 40 years	Female	Urine	Outpatient		Escherichia coli	E-BLSE	Not detected	Not detected	Not detected	Not detected	Not detected	Susceptible	Susceptible	Susceptible	Resistant	Resistant	Susceptible	Resistant	Susceptible	Susceptible	Susceptible	Susceptible
2108	13	< 40 years	Male	Urine	Outpatient		Escherichia coli	E-BLSE	Not detected	Not detected	Not detected	Not detected	Not detected	Susceptible	Susceptible	Resistant	Resistant	Resistant	Susceptible	Resistant	Susceptible	Susceptible	Susceptible	Susceptible
1900	75	≥ 40 years	Female	Urine	Inpatient	Medical	Serratia marcescens	E-BLSE	Not detected	Not detected	Not detected	Not detected	Not detected	Susceptible	Susceptible	Resistant	Resistant	Resistant	Resistant	Resistant	Resistant	Susceptible	Susceptible	Susceptible
2259	20	< 40 years	Male	Urine	Inpatient	Surgical	Klebsiella pneumoniae	E-BLSE	Not detected	Not detected	Not detected	Not detected	Not detected	Susceptible	Susceptible	Susceptible	Resistant	Resistant	Susceptible	Resistant	Resistant	Susceptible	Susceptible	Susceptible
2398	4	< 40 years	Female	Urine	Inpatient	Medical	Escherichia coli	E-BLSE	Not detected	Not detected	Not detected	Not detected	Not detected	Susceptible	Susceptible	Susceptible	Resistant	Resistant	Susceptible	Resistant	Susceptible	Susceptible	Susceptible	Resistant
2600	29	< 40 years	Male	Urine	Inpatient	Medical	Escherichia coli	E-BLSE	Not detected	Not detected	Not detected	Not detected	Not detected	Susceptible	Susceptible	Susceptible	Resistant	Resistant	Susceptible	Resistant	Susceptible	Susceptible	Susceptible	Resistant
2693	70	≥ 40 years	Male	Urine	Inpatient	Medical	Klebsiella pneumoniae	E-BLSE	Not detected	Not detected	Not detected	Not detected	Not detected	Susceptible	Susceptible	Susceptible	Susceptible	Susceptible	Susceptible	Resistant	Resistant	Susceptible	Susceptible	Resistant
2637	0.91	< 40 years	Male	Urine	Inpatient	Emergencies and ICU	Klebsiella pneumoniae	E-BLSE	Not detected	Not detected	Not detected	Not detected	Not detected	Susceptible	Susceptible	Susceptible	Susceptible	Susceptible	Susceptible	Resistant	Resistant	Susceptible	Susceptible	Susceptible
1958	35	< 40 years	Female	Urine	Inpatient	Medical	Escherichia coli	E-BLSE	Not detected	Not detected	Not detected	Not detected	Not detected	Susceptible	Resistant	Resistant	Resistant	Resistant	Susceptible	Resistant	Susceptible	Susceptible	Susceptible	Resistant
2137	74	≥ 40 years	Male	Urine	Outpatient		Escherichia coli	E-BLSE	Not detected	Not detected	Not detected	Not detected	Not detected	Susceptible	Susceptible	Resistant	Resistant	Resistant	Susceptible	Resistant	Susceptible	Susceptible	Susceptible	Resistant
2279	80	≥ 40 years	Male	Urine	Inpatient	Medical	Proteus mirabilis	E-BLSE	Not detected	Not detected	Not detected	Not detected	Not detected	Susceptible	Susceptible	Resistant	Resistant	Resistant	Susceptible	Resistant	Resistant	Susceptible	Resistant	Susceptible
2404	70	≥ 40 years	Male	Urine	Inpatient	Medical	Proteus mirabilis	E-BLSE	Not detected	Not detected	Not detected	Not detected	Not detected	Susceptible	Susceptible	Resistant	Susceptible	Susceptible	Susceptible	Resistant	Susceptible	Susceptible	Susceptible	Susceptible
1457	0.008	< 40 years	Male	Urine	Inpatient	Medical	Klebsiella pneumoniae	E-BLSE	Not detected	Not detected	Not detected	Not detected	Not detected	Susceptible	Susceptible	Susceptible	Susceptible	Susceptible	Susceptible	Resistant	Susceptible	Susceptible	Susceptible	Susceptible
1500	80	≥ 40 years	Male	Urine	Inpatient	Medical	Escherichia coli	E-BLSE	Not detected	Not detected	Not detected	Not detected	Not detected	Susceptible	Susceptible	Resistant	Resistant	Resistant	Susceptible	Resistant	Susceptible	Susceptible	Susceptible	Susceptible
1502	62	≥ 40 years	Male	Urine	Inpatient	Medical	Klebsiella pneumoniae	E-BLSE	Not detected	Not detected	Not detected	Not detected	Not detected	Susceptible	Susceptible	Resistant	Susceptible	Susceptible	Susceptible	Resistant	Resistant	Susceptible	Susceptible	Susceptible
1788	67	≥ 40 years	Male	Urine	Inpatient	Medical	Escherichia coli	E-BLSE	Not detected	Not detected	Not detected	Not detected	Not detected	Susceptible	Susceptible	Susceptible	Resistant	Resistant	Susceptible	Resistant	Resistant	Susceptible	Resistant	Susceptible
2442	60	≥ 40 years	Male	Urine	Outpatient		Proteus mirabilis	E-BLSE	Not detected	Not detected	Not detected	Not detected	Not detected	Susceptible	Susceptible	Resistant	Resistant	Resistant	Susceptible	Resistant	Resistant	Susceptible	Susceptible	Susceptible
1388	78	≥ 40 years	Male	Urine	Inpatient	Medical	Klebsiella pneumoniae	E-BLSE	Not detected	Not detected	Not detected	Not detected	Not detected	Susceptible	Susceptible	Resistant	Resistant	Resistant	Susceptible	Resistant	Susceptible	Susceptible	Susceptible	Susceptible
1389	30	< 40 years	Female	Urine	Inpatient	Emergencies and ICU	Escherichia coli	E-BLSE	Not detected	Not detected	Not detected	Not detected	Not detected	Susceptible	Susceptible	Resistant	Resistant	Resistant	Susceptible	Resistant	Susceptible	Susceptible	Susceptible	Susceptible
1390	92	≥ 40 years	Male	Urine	Inpatient	Medical	Escherichia coli	E-BLSE	Not detected	Not detected	Not detected	Not detected	Not detected	Susceptible	Susceptible	Resistant	Resistant	Resistant	Susceptible	Resistant	Resistant	Susceptible	Susceptible	Susceptible
1400	22	< 40 years	Male	Urine	Inpatient	Medical	Escherichia coli	E-BLSE	Not detected	Not detected	Not detected	Not detected	Not detected	Susceptible	Susceptible	Resistant	Resistant	Resistant	Susceptible	Resistant	Susceptible	Susceptible	Susceptible	Susceptible
1436	65	≥ 40 years	Male	Urine	Inpatient	Medical	Escherichia coli	E-BLSE	Not detected	Not detected	Not detected	Not detected	Not detected	Susceptible	Susceptible	Susceptible	Resistant	Resistant	Susceptible	Resistant	Susceptible	Susceptible	Susceptible	Susceptible
1458	90	≥ 40 years	Male	Urine	Inpatient	Medical	Escherichia coli	E-BLSE	Not detected	Not detected	Not detected	Not detected	Not detected	Susceptible	Susceptible	Susceptible	Resistant	Resistant	Susceptible	Resistant	Susceptible	Susceptible	Susceptible	Susceptible
1426	81	≥ 40 years	Male	Urine	Inpatient	Medical	Escherichia coli	E-BLSE	Not detected	Not detected	Not detected	Not detected	Not detected	Susceptible	Susceptible	Resistant	Resistant	Resistant	Susceptible	Resistant	Resistant	Susceptible	Susceptible	Susceptible
1785	41	≥ 40 years	Male	Urine	Inpatient	Medical	Klebsiella pneumoniae	E-BLSE	Not detected	Not detected	Not detected	Not detected	Not detected	Susceptible	Susceptible	Susceptible	Resistant	Resistant	Susceptible	Resistant	Resistant	Susceptible	Susceptible	Susceptible
1748	1.83	< 40 years	Male	Urine	Outpatient		Escherichia coli	E-BLSE	Not detected	Not detected	Not detected	Not detected	Not detected	Susceptible	Susceptible	Resistant	Susceptible	Susceptible	Susceptible	Resistant	Susceptible	Susceptible	Susceptible	Susceptible
1697	84	≥ 40 years	Male	Urine	Inpatient	Medical	Klebsiella oxytoca	E-BLSE	Not detected	Not detected	Not detected	Not detected	Not detected	Susceptible	Susceptible	Resistant	Resistant	Resistant	Susceptible	Resistant	Susceptible	Susceptible	Susceptible	Susceptible
1773	3	< 40 years	Male	Urine	Outpatient		Klebsiella pneumoniae	E-BLSE	Not detected	Not detected	Not detected	Not detected	Not detected	Susceptible	Susceptible	Resistant	Resistant	Resistant	Susceptible	Susceptible	Susceptible	Susceptible	Susceptible	Susceptible
1713	85	≥ 40 years	Female	Urine	Inpatient	Emergencies and ICU	Serratia marcescens	E-BLSE	Not detected	Not detected	Not detected	Not detected	Not detected	Susceptible	Susceptible	Resistant	Resistant	Resistant	Susceptible	Resistant	Resistant	Susceptible	Susceptible	Susceptible
2133	1.66	< 40 years	Female	Urine	Inpatient	Emergencies and ICU	Escherichia coli	E-BLSE	Not detected	Not detected	Not detected	Not detected	Not detected	Susceptible	Susceptible	Resistant	Resistant	Resistant	Susceptible	Resistant	Susceptible	Susceptible	Susceptible	Susceptible
1979	60	≥ 40 years	Female	Urine	Outpatient		Escherichia coli	E-BLSE	Not detected	Not detected	Not detected	Not detected	Not detected	Susceptible	Susceptible	Resistant	Resistant	Resistant	Susceptible	Resistant	Susceptible	Susceptible	Susceptible	Susceptible
2386	20	< 40 years	Female	Urine	Inpatient	Medical	Escherichia coli	E-BLSE	Not detected	Not detected	Not detected	Not detected	Not detected	Susceptible	Susceptible	Susceptible	Susceptible	Susceptible	Resistant	Resistant	Susceptible	Susceptible	Susceptible	Susceptible
2125	70	≥ 40 years	Male	Urine	Outpatient		Klebsiella pneumoniae	E-BLSE	Not detected	Not detected	Not detected	Not detected	Not detected	Susceptible	Susceptible	Resistant	Resistant	Resistant	Susceptible	Resistant	Resistant	Susceptible	Susceptible	Susceptible
1917	5	< 40 years	Female	Urine	Inpatient	Emergencies and ICU	Escherichia coli	E-BLSE	Not detected	Not detected	Not detected	Not detected	Not detected	Susceptible	Susceptible	Resistant	Resistant	Resistant	Susceptible	Resistant	Susceptible	Susceptible	Susceptible	Susceptible
2208	70	≥ 40 years	Male	Urine	Inpatient	Medical	Escherichia coli	E-BLSE	Not detected	Not detected	Not detected	Not detected	Not detected	Susceptible	Susceptible	Resistant	Resistant	Resistant	Susceptible	Resistant	Susceptible	Susceptible	Susceptible	Susceptible
2039	73	≥ 40 years	Male	Urine	Inpatient	Medical	Proteus mirabilis	E-BLSE	Not detected	Not detected	Not detected	Not detected	Not detected	Susceptible	Susceptible	Resistant	Resistant	Resistant	Susceptible	Resistant	Resistant	Susceptible	Susceptible	Susceptible
1895	48	≥ 40 years	Female	Urine	Inpatient	Emergencies and ICU	Escherichia coli	E-BLSE	Not detected	Not detected	Not detected	Not detected	Not detected	Susceptible	Susceptible	Susceptible	Resistant	Resistant	Susceptible	Resistant	Susceptible	Susceptible	Susceptible	Susceptible
2272	56	≥ 40 years	Female	Urine	Inpatient	Medical	Escherichia coli	E-BLSE	Not detected	Not detected	Not detected	Not detected	Not detected	Susceptible	Susceptible	Resistant	Susceptible	Susceptible	Susceptible	Resistant	Resistant	Susceptible	Susceptible	Susceptible
2030	36	< 40 years	Female	Urine	Inpatient	Emergencies and ICU	Escherichia coli	E-BLSE	Not detected	Not detected	Not detected	Not detected	Not detected	Susceptible	Susceptible	Resistant	Susceptible	Susceptible	Susceptible	Susceptible	Susceptible	Susceptible	Susceptible	Susceptible
1975	17	< 40 years	Female	Urine	Inpatient	Medical	Klebsiella pneumoniae	E-BLSE	Not detected	Not detected	Not detected	Not detected	Not detected	Susceptible	Susceptible	Resistant	Susceptible	Susceptible	Susceptible	Susceptible	Resistant	Susceptible	Susceptible	Susceptible
2018	10	< 40 years	Male	Urine	Inpatient	Emergencies and ICU	Klebsiella pneumoniae	E-BLSE	Not detected	Not detected	Not detected	Not detected	Not detected	Susceptible	Susceptible	Resistant	Resistant	Resistant	Resistant	Resistant	Resistant	Susceptible	Susceptible	Susceptible
2299	74	≥ 40 years	Male	Urine	Inpatient	Medical	Escherichia coli	E-BLSE	Not detected	Not detected	Not detected	Not detected	Not detected	Susceptible	Susceptible	Susceptible	Resistant	Resistant	Susceptible	Susceptible	Susceptible	Susceptible	Susceptible	Susceptible
1944	77	≥ 40 years	Male	Urine	Inpatient	Medical	Klebsiella pneumoniae	E-BLSE	Not detected	Not detected	Not detected	Not detected	Not detected	Susceptible	Susceptible	Susceptible	Resistant	Resistant	Susceptible	Susceptible	Resistant	Susceptible	Susceptible	Susceptible
2257	37	< 40 years	Male	Urine	Inpatient	Medical	klebsiella oxytoca	E-BLSE	Not detected	Not detected	Not detected	Not detected	Not detected	Susceptible	Susceptible	Susceptible	Resistant	Resistant	Resistant	Resistant	Resistant	Susceptible	Susceptible	Susceptible
2128	83	≥ 40 years	Male	Urine	Inpatient	Emergencies and ICU	Escherichia coli	E-BLSE	Not detected	Not detected	Not detected	Not detected	Not detected	Susceptible	Susceptible	Resistant	Resistant	Resistant	Resistant	Resistant	Susceptible	Susceptible	Susceptible	Susceptible
1907	45	≥ 40 years	Male	Urine	Inpatient	Medical	Escherichia coli	E-BLSE	Not detected	Not detected	Not detected	Not detected	Not detected	Susceptible	Susceptible	Resistant	Resistant	Resistant	Susceptible	Susceptible	Susceptible	Susceptible	Susceptible	Susceptible
2993	38	< 40 years	Male	Urine	Outpatient		Pseudomonas aeruginosa	CRPA	Not detected	Not detected	Not detected	Not detected	Not detected	Resistant	Resistant		Resistant	Resistant		Resistant	Resistant	Resistant	Resistant	Susceptible
2	40	≥ 40 years	Male	Urine	Outpatient		Klebsiella oxytoca	CRE	Not detected	Not detected	Not detected	Not detected	Not detected	Resistant	Resistant	Resistant	Resistant	Resistant	Resistant	Resistant	Resistant	Susceptible	Susceptible	Resistant
869	75	≥ 40 years	Male	Urine	Inpatient	Medical	Salmonella spp	CRE	Not detected	Not detected	Not detected	Not detected	Not detected	Resistant	Resistant	Resistant	Resistant	Resistant	Resistant	Resistant	Susceptible	Susceptible	Susceptible	Resistant
1408	74	≥ 40 years	Male	Urine	Inpatient	Medical	Escherichia coli	CRE	Not detected	Not detected	Not detected	Not detected	Not detected	Resistant	Resistant	Resistant	Resistant	Resistant	Susceptible	Resistant	Susceptible	Susceptible	Susceptible	Resistant
442	50	≥ 40 years	Male	Urine	Inpatient	Medical	Pseudomonas aeruginosa	CRPA	Not detected	Not detected	Not detected	Not detected	Not detected	Resistant	Resistant		Resistant	Resistant		Resistant	Resistant	Resistant	Resistant	Resistant
1292	62	≥ 40 years	Male	Urine	Outpatient		Escherichia coli	CRE	Not detected	Not detected	Not detected	Not detected	Not detected	Resistant	Resistant	Susceptible	Resistant	Resistant	Susceptible	Resistant	Susceptible	Susceptible	Susceptible	Resistant
813	64	≥ 40 years	Male	Urine	Inpatient	Medical	Escherichia coli	E-BLSE	Not detected	Not detected	Not detected	Not detected	Not detected	Susceptible	Susceptible	Resistant	Resistant	Resistant	Susceptible	Resistant	Susceptible	Susceptible	Susceptible	Susceptible
2494	0.58	< 40 years	Male	Urine	Inpatient	Emergencies and ICU	Escherichia coli	CRE	Not detected	Not detected	Not detected	Not detected	Not detected	Resistant	Resistant	Resistant	Resistant	Resistant	Susceptible	Resistant	Resistant	Susceptible	Susceptible	Resistant
1387	40	≥ 40 years	Male	Urine	Inpatient	Medical	Escherichia coli	CRE	Not detected	Not detected	Not detected	Not detected	Not detected	Resistant	Resistant	Resistant	Resistant	Resistant	Susceptible	Resistant	Resistant	Susceptible	Susceptible	Resistant
1454	71	≥ 40 years	Male	Urine	Inpatient	Medical	Serratia odorifera	CRE	Not detected	Detected	Not detected	Detected	VIM+OXA-48	Resistant	Resistant	Susceptible	Resistant	Resistant	Susceptible	Resistant	Susceptible	Susceptible	Susceptible	Resistant
2153	9	< 40 years	Female	Urine	Inpatient	Emergencies and ICU	Escherichia coli	CRE	Not detected	Not detected	Not detected	Not detected	Not detected	Resistant	Resistant	Resistant	Resistant	Resistant	Susceptible	Resistant	Susceptible	Susceptible	Susceptible	Resistant
3452	67	≥ 40 years	Male	Urine	Inpatient	Medical	Acinetobacter baumannii	CRAB	Not detected	Not detected	Not detected	Not detected	Not detected	Resistant	Susceptible	Susceptible	Resistant	Susceptible		Resistant		Susceptible	Susceptible
2621	0.16	< 40 years	Male	Urine	Inpatient	Emergencies and ICU	Escherichia coli	CRE	Not detected	Detected	Detected	Not detected	VIM+NDM	Resistant	Susceptible	Resistant	Resistant	Resistant	Susceptible	Resistant	Susceptible	Susceptible	Susceptible	Resistant
4992	57	≥ 40 years	Male	Urine	Outpatient		Acinetobacter baumannii	CRAB	Not detected	Not detected	Not detected	Not detected	Not detected	Resistant	Susceptible	Resistant	Resistant	Susceptible		Resistant		Susceptible	Susceptible
2062	9	< 40 years	Female	Urine	Inpatient	Emergencies and ICU	Escherichia coli	CRE	Not detected	Not detected	Not detected	Not detected	Not detected	Resistant	Susceptible	Resistant	Resistant	Resistant	Susceptible	Resistant	Susceptible	Susceptible	Susceptible	Susceptible
29	48	≥ 40 years	Male	Pus	Outpatient		Escherichia coli	E-BLSE	Not detected	Not detected	Not detected	Not detected	Not detected	Susceptible	Susceptible	Resistant	Resistant	Resistant		Resistant		Susceptible	Susceptible	Susceptible
1953	70	≥ 40 years	Male	Urine	Inpatient	Medical	Acinetobacter baumannii	CRAB	Not detected	Not detected	Not detected	Not detected	Not detected	Resistant	Susceptible	Susceptible	Resistant	Susceptible		Resistant		Susceptible	Susceptible
1927	18	< 40 years	Male	Urine	Inpatient	Medical	Escherichia coli	CRE	Not detected	Not detected	Not detected	Not detected	Not detected	Resistant	Susceptible	Resistant	Resistant	Resistant	Susceptible	Resistant	Susceptible	Susceptible	Susceptible	Susceptible
37	88	≥ 40 years	Male	Urine	Inpatient	Medical	Serratia marcescens	E-BLSE	Not detected	Not detected	Not detected	Not detected	Not detected	Susceptible	Susceptible	Resistant	Resistant	Resistant	Susceptible	Resistant	Resistant	Resistant	Resistant	Resistant
1834	70	≥ 40 years	Male	Urine	Inpatient	Medical	Escherichia coli	E-BLSE	Not detected	Not detected	Not detected	Not detected	Not detected	Susceptible	Susceptible	Susceptible	Resistant	Resistant	Resistant	Resistant	Susceptible	Susceptible	Susceptible	Susceptible
1725	25	< 40 years	Male	Urine	Outpatient		Acinetobacter baumannii	CRAB	Not detected	Not detected	Not detected	Not detected	Not detected	Resistant	Susceptible	Susceptible	Resistant	Susceptible		Resistant		Susceptible	Susceptible
1438	80	≥ 40 years	Male	Urine	Inpatient	Medical	Acinetobacter baumannii	CRAB	Not detected	Not detected	Not detected	Not detected	Not detected	Resistant	Resistant	Susceptible	Resistant	Resistant		Resistant		Susceptible	Susceptible
991	0.5	< 40 years	Female	Urine	Inpatient	Medical	Serratia odorifera	CRE	Not detected	Not detected	Not detected	Not detected	Not detected	Resistant	Susceptible	Resistant	Resistant	Resistant	Susceptible	Resistant	Resistant	Susceptible	Susceptible	Resistant
2075	70	≥ 40 years	Female	Urine	Inpatient	Medical	klebsiella pneumoniae	CRE	Not detected	Not detected	Not detected	Not detected	Not detected	Resistant	Susceptible	Resistant	Resistant	Resistant	Susceptible	Resistant	Susceptible	Susceptible	Susceptible	Resistant
210	40	≥ 40 years	Female	Pus	Inpatient	Surgical	klebsiella pneumoniae	CRE	Not detected	Not detected	Not detected	Not detected	Not detected	Resistant	Susceptible	Resistant	Resistant	Resistant		Resistant		Susceptible	Susceptible	Susceptible
2580	50	≥ 40 years	Male	Urine	Inpatient	Medical	Klebsiella pneumoniae	CRE	Not detected	Not detected	Not detected	Not detected	Not detected	Resistant	Susceptible	Susceptible	Resistant	Resistant	Susceptible	Resistant	Susceptible	Susceptible	Susceptible	Resistant
134	40	≥ 40 years	Male	Urine	Outpatient		Escherichia coli	CRE	Not detected	Not detected	Not detected	Not detected	Not detected	Resistant	Susceptible	Resistant	Resistant	Resistant	Susceptible	Resistant	Resistant	Susceptible	Susceptible	Susceptible
238	1.08	< 40 years	Male	Pus	Inpatient	Medical	Escherichia coli	CRE	Not detected	Not detected	Not detected	Not detected	Not detected	Resistant	Resistant	Resistant	Resistant	Resistant		Resistant		Resistant	Resistant	Resistant
1377	80	≥ 40 years	Male	Urine	Inpatient	Medical	klebsiella pneumoniae	CRE	Not detected	Not detected	Not detected	Not detected	Not detected	Resistant	Resistant	Resistant	Resistant	Resistant	Susceptible	Resistant	Resistant	Susceptible	Susceptible	Resistant
234	80	≥ 40 years	Male	Urine	Outpatient		Pseudomonas aeruginosa	CRPA	Not detected	Not detected	Not detected	Not detected	Not detected	Resistant	Resistant		Resistant	Resistant		Resistant	Resistant	Resistant	Resistant	Susceptible
59	19	< 40 years	Male	Pus	Outpatient		klebsiella pneumoniae	CRE	Not detected	Not detected	Not detected	Not detected	Not detected	Resistant	Resistant	Resistant	Resistant	Resistant		Resistant		Susceptible	Susceptible	Resistant
2686	25	< 40 years	Female	Urine	Outpatient		Pseudomonas aeruginosa	CRPA	Not detected	Not detected	Not detected	Not detected	Not detected	Resistant	Susceptible		Resistant	Resistant		Resistant	Resistant	Resistant	Resistant	Susceptible
1059	35	< 40 years	Female	Urine	Outpatient		Citrobacter spp	CRE	Not detected	Not detected	Not detected	Not detected	Not detected	Susceptible	Resistant	Resistant	Resistant	Resistant	Susceptible	Resistant	Resistant	Susceptible	Susceptible	Susceptible
2496	60	≥ 40 years	Male	Urine	Outpatient		klebsiella pneumoniae	CRE	Not detected	Not detected	Not detected	Not detected	Not detected	Resistant	Resistant	Resistant	Resistant	Resistant	Susceptible	Resistant	Susceptible	Susceptible	Susceptible	Resistant
2403	65	≥ 40 years	Male	Urine	Inpatient	Medical	Escherichia coli	CRE	Not detected	Not detected	Not detected	Not detected	Not detected	Resistant	Resistant	Resistant	Resistant	Resistant	Susceptible	Resistant	Susceptible	Susceptible	Susceptible	Resistant
2152	17	< 40 years	Female	Urine	Outpatient		Pseudomonas aeruginosa	CRPA	Not detected	Not detected	Not detected	Not detected	Not detected	Resistant	Resistant		Resistant	Resistant		Resistant	Resistant	Resistant	Resistant	Susceptible
2041	44	≥ 40 years	Female	Urine	Inpatient	Medical	Escherichia coli	CRE	Not detected	Not detected	Not detected	Not detected	Not detected	Resistant	Resistant	Resistant	Resistant	Resistant	Resistant	Resistant	Resistant	Susceptible	Susceptible	Resistant
2182	82	≥ 40 years	Male	Urine	Inpatient	Medical	Acinetobacter baumannii	CRAB	Not detected	Not detected	Not detected	Not detected	Not detected	Resistant	Susceptible	Susceptible	Resistant	Susceptible		Resistant		Susceptible	Susceptible
804	20	< 40 years	Female	Cerebrospinal fluid	Outpatient		Enterobacter spp	CRE	Not detected	Not detected	Not detected	Not detected	Not detected	Resistant	Susceptible	Resistant	Resistant	Resistant		Resistant		Resistant	Resistant	Resistant
208	0.41	< 40 years	Male	Urine	Inpatient	Medical	Yersinia pseudotuberculosis	CRE	Not detected	Not detected	Not detected	Not detected	Not detected	Resistant	Susceptible	Resistant	Resistant	Resistant	Resistant	Resistant	Resistant	Resistant	Susceptible	Susceptible
111	36	< 40 years	Female	Pus	Inpatient	Surgical	Escherichia coli	E-BLSE	Not detected	Not detected	Not detected	Not detected	Not detected	Susceptible	Susceptible	Resistant	Resistant	Resistant		Resistant		Susceptible	Susceptible	Susceptible
936	35	< 40 years	Male	Pus	Outpatient		Pseudomonas aeruginosa	CRPA	Not detected	Not detected	Not detected	Not detected	Not detected	Resistant	Resistant		Resistant	Resistant		Resistant		Resistant	Resistant	Susceptible
2536	62	≥ 40 years	Male	Urine	Outpatient		Citrobacter spp	CRE	Not detected	Not detected	Not detected	Not detected	Not detected	Resistant	Susceptible	Resistant	Resistant	Resistant	Resistant	Resistant	Resistant	Resistant	Susceptible	Susceptible
36	70	≥ 40 years	Male	Pus	Outpatient		Pseudomonas aeruginosa	CRPA	Not detected	Not detected	Not detected	Not detected	Not detected	Resistant	Susceptible		Resistant	Resistant		Resistant		Resistant	Resistant	Resistant
2027	87	≥ 40 years	Male	Urine	Inpatient	Medical	Klebsiella pneumoniae	CRE	Not detected	Not detected	Not detected	Not detected	Not detected	Resistant	Susceptible	Resistant	Resistant	Resistant	Resistant	Resistant	Susceptible	Susceptible	Susceptible	Susceptible
2195	42	≥ 40 years	Male	Urine	Outpatient		Escherichia coli	CRE	Not detected	Not detected	Not detected	Not detected	Not detected	Resistant	Resistant	Resistant	Resistant	Resistant	Resistant	Resistant	Resistant	Susceptible	Susceptible	Resistant
1753	30	< 40 years	Male	Urine	Inpatient	Medical	Escherichia coli	CRE	Not detected	Not detected	Not detected	Not detected	Not detected	Resistant	Resistant	Resistant	Resistant	Resistant	Susceptible	Resistant	Susceptible	Susceptible	Susceptible	Susceptible
11	4	< 40 years	Female	Pus	Inpatient	Medical	klebsiella pneumoniae	E-BLSE	Not detected	Not detected	Not detected	Not detected	Not detected	Susceptible	Susceptible	Resistant	Susceptible	Susceptible		Resistant		Susceptible	Susceptible	Susceptible
12	30	< 40 years	Male	venous catheter	Inpatient	Medical	Acinetobacter baumannii	CRAB	Not detected	Not detected	Not detected	Not detected	Not detected	Resistant	Susceptible	Resistant	Resistant	Susceptible		Resistant			Resistant
3218	71	≥ 40 years	Male	Urine	Inpatient	Medical	Pseudomonas aeruginosa	CRPA	Not detected	Not detected	Not detected	Not detected	Not detected	Resistant	Susceptible		Resistant	Resistant		Resistant	Resistant	Resistant	Resistant	Susceptible
3242	0.08	< 40 years	Male	Urine	Inpatient	Medical	Klebsiella pneumoniae	E-BLSE	Not detected	Not detected	Not detected	Not detected	Not detected	Susceptible	Susceptible	Resistant	Susceptible	Resistant	Resistant	Resistant	Susceptible	Susceptible	Susceptible	Susceptible
3246	65	≥ 40 years	Male	Urine	Inpatient	Medical	Serratia odorifera	E-BLSE	Not detected	Not detected	Not detected	Not detected	Not detected	Susceptible	Susceptible	Susceptible	Resistant	Resistant	Resistant	Resistant	Susceptible	Susceptible	Susceptible	Susceptible
303	10	< 40 years	Female	Pus	Inpatient	Emergencies and ICU	Escherichia coli	E-BLSE	Not detected	Not detected	Not detected	Not detected	Not detected	Susceptible	Susceptible	Susceptible	Resistant	Resistant		Resistant		Susceptible	Susceptible	Susceptible
3264	60	≥ 40 years	Male	Urine	Inpatient	Medical	Pseudomonas aeruginosa	CRPA	Not detected	Not detected	Not detected	Not detected	Not detected	Resistant	Susceptible		Resistant	Resistant		Resistant	Susceptible	Resistant	Resistant	Resistant
3250	0.04	< 40 years	Male	Urine	Inpatient	Medical	Escherichia coli	CRE	Not detected	Not detected	Detected	Not detected	NDM	Resistant	Susceptible	Resistant	Susceptible	Susceptible	Resistant	Resistant	Susceptible	Susceptible	Susceptible	Susceptible
3061	23	< 40 years	Male	Urine	Outpatient		Escherichia coli	E-BLSE	Not detected	Not detected	Not detected	Not detected	Not detected	Susceptible	Susceptible	Resistant	Resistant	Resistant	Resistant	Resistant	Susceptible	Susceptible	Susceptible	Susceptible
3069	76	≥ 40 years	Male	Urine	Inpatient	Medical	Morganella morganii	E-BLSE	Not detected	Not detected	Not detected	Not detected	Not detected	Susceptible	Susceptible	Resistant	Resistant	Resistant	Resistant	Resistant	Susceptible	Susceptible	Susceptible	Susceptible
3098	72	≥ 40 years	Male	Urine	Inpatient	Emergencies and ICU	Escherichia coli	E-BLSE	Not detected	Not detected	Not detected	Not detected	Not detected	Susceptible	Susceptible	Resistant	Resistant	Resistant	Resistant	Resistant	Susceptible	Susceptible	Susceptible	Susceptible
3100	74	≥ 40 years	Male	Urine	Outpatient		Klebsiella pneumoniae	CRE	Not detected	Not detected	Not detected	Not detected	Not detected	Resistant	Susceptible	Resistant	Resistant	Resistant	Resistant	Resistant	Susceptible	Susceptible	Resistant	Susceptible
277	9	< 40 years	Female	Pus	Inpatient	Surgical	Escherichia coli	CRE	Not detected	Not detected	Not detected	Not detected	Not detected	Resistant	Susceptible	Resistant	Resistant	Resistant		Resistant		Susceptible	Susceptible	Resistant
843	64	≥ 40 years	Male	Urine	Inpatient	Medical	klebsiella pneumoniae	E-BLSE	Not detected	Not detected	Not detected	Not detected	Not detected	Susceptible	Susceptible	Resistant	Resistant	Resistant	Resistant	Resistant	Susceptible	Susceptible	Susceptible	Susceptible
834	74	≥ 40 years	Male	Urine	Inpatient	Medical	klebsiella pneumoniae	E-BLSE	Not detected	Not detected	Not detected	Not detected	Not detected	Susceptible	Susceptible	Susceptible	Resistant	Resistant	Susceptible	Resistant	Susceptible	Susceptible	Susceptible	Resistant
220	48	≥ 40 years	Female	Pus	Inpatient	Medical	Escherichia coli	CRE	Not detected	Not detected	Not detected	Not detected	Not detected	Resistant	Susceptible	Resistant	Resistant	Resistant		Resistant		Susceptible	Susceptible	Susceptible
2013	18	< 40 years	Female	Urine	Inpatient	Emergencies and ICU	Escherichia coli	E-BLSE	Not detected	Not detected	Not detected	Not detected	Not detected	Susceptible	Susceptible	Susceptible	Susceptible	Susceptible	Susceptible	Resistant	Susceptible	Susceptible	Susceptible	Susceptible
2042	56	≥ 40 years	Male	Urine	Inpatient	Medical	Escherichia coli	E-BLSE	Not detected	Not detected	Not detected	Not detected	Not detected	Susceptible	Susceptible	Susceptible	Resistant	Resistant	Resistant	Resistant	Susceptible	Susceptible	Susceptible	Susceptible
217	70	≥ 40 years	Male	Urine	Inpatient	Medical	Enterobacter spp	CRE	Not detected	Not detected	Not detected	Not detected	Not detected	Resistant	Susceptible	Resistant	Resistant	Resistant	Susceptible	Resistant	Susceptible	Susceptible	Susceptible	Susceptible
376	19	< 40 years	Female	Urine	Inpatient	Emergencies and ICU	Klebsiella oxytoca	E-BLSE	Not detected	Not detected	Not detected	Not detected	Not detected	Susceptible	Susceptible	Susceptible	Resistant	Resistant	Susceptible	Resistant	Resistant	Susceptible	Susceptible	Susceptible
739	22	< 40 years	Female	Urine	Outpatient		klebsiella pneumoniae	E-BLSE	Not detected	Not detected	Not detected	Not detected	Not detected	Susceptible	Susceptible	Susceptible	Resistant	Resistant	Resistant	Resistant	Susceptible	Susceptible	Susceptible	Susceptible
722	73	≥ 40 years	Male	Urine	Outpatient		Escherichia coli	E-BLSE	Not detected	Not detected	Not detected	Not detected	Not detected	Susceptible	Susceptible	Susceptible	Resistant	Resistant	Resistant	Resistant	Susceptible	Susceptible	Susceptible	Susceptible
735	0.5	< 40 years	Male	Urine	Inpatient	Medical	Escherichia coli	E-BLSE	Not detected	Not detected	Not detected	Not detected	Not detected	Susceptible	Susceptible	Susceptible	Susceptible	Susceptible	Resistant	Resistant	Susceptible	Susceptible	Susceptible	Susceptible
2385	60	≥ 40 years	Male	Urine	Inpatient	Medical	Escherichia coli	E-BLSE	Not detected	Not detected	Not detected	Not detected	Not detected	Susceptible	Susceptible	Resistant	Susceptible	Susceptible	Resistant	Resistant	Susceptible	Susceptible	Susceptible	Susceptible
2085	66	≥ 40 years	Male	Urine	Inpatient	Medical	klebsiella pneumoniae	E-BLSE	Not detected	Not detected	Not detected	Not detected	Not detected	Susceptible	Susceptible	Resistant	Resistant	Resistant	Resistant	Resistant	Susceptible	Susceptible	Susceptible	Susceptible
2326	63	≥ 40 years	Male	Urine	Inpatient	Emergencies and ICU	klebsiella pneumoniae	E-BLSE	Not detected	Not detected	Not detected	Not detected	Not detected	Susceptible	Susceptible	Resistant	Resistant	Resistant	Resistant	Resistant	Susceptible	Susceptible	Susceptible	Susceptible
1764	75	≥ 40 years	Male	Urine	Inpatient	Medical	klebsiella pneumoniae	E-BLSE	Not detected	Not detected	Not detected	Not detected	Not detected	Susceptible	Susceptible	Resistant	Resistant	Resistant	Resistant	Resistant	Susceptible	Susceptible	Susceptible	Susceptible
1969	83	≥ 40 years	Male	Urine	Inpatient	Medical	Escherichia coli	E-BLSE	Not detected	Not detected	Not detected	Not detected	Not detected	Susceptible	Susceptible	Resistant	Resistant	Resistant	Resistant	Resistant	Susceptible	Resistant	Susceptible	Susceptible
2275	2	< 40 years	Male	Urine	Inpatient	Medical	Escherichia coli	E-BLSE	Not detected	Not detected	Not detected	Not detected	Not detected	Susceptible	Susceptible	Resistant	Susceptible	Susceptible	Resistant	Resistant	Susceptible	Susceptible	Susceptible	Susceptible
1989	47	≥ 40 years	Male	Urine	Inpatient	Medical	Klebsiella pneumoniae	E-BLSE	Not detected	Not detected	Not detected	Not detected	Not detected	Susceptible	Susceptible	Resistant	Resistant	Resistant	Susceptible	Resistant	Susceptible	Susceptible	Susceptible	Susceptible
2033	51	≥ 40 years	Female	Urine	Inpatient	Medical	Escherichia coli	E-BLSE	Not detected	Not detected	Not detected	Not detected	Not detected	Susceptible	Susceptible	Susceptible	Resistant	Resistant	Susceptible	Resistant	Susceptible	Susceptible	Susceptible	Susceptible
2087	6	< 40 years	Male	Urine	Outpatient		Escherichia coli	E-BLSE	Not detected	Not detected	Not detected	Not detected	Not detected	Susceptible	Susceptible	Resistant	Susceptible	Susceptible	Resistant	Resistant	Susceptible	Susceptible	Susceptible	Susceptible
179	42	≥ 40 years	Male	Pus	Inpatient	Medical	Escherichia coli	E-BLSE	Not detected	Not detected	Not detected	Not detected	Not detected	Susceptible	Susceptible	Resistant	Resistant	Resistant		Resistant		Susceptible	Susceptible	Susceptible
3134	1	< 40 years	Female	Urine	Inpatient	Medical	Escherichia coli	CRE	Not detected	Not detected	Detected	Not detected	NDM	Resistant	Resistant	Resistant	Resistant	Resistant	Susceptible	Resistant	Susceptible	Susceptible	Susceptible	Susceptible
181	29	< 40 years	Female	Pus	Inpatient	Emergencies and ICU	Pseudomonas aeruginosa	CRPA	Not detected	Not detected	Not detected	Not detected	Not detected	Resistant	Susceptible		Resistant	Resistant		Resistant		Resistant	Resistant	Susceptible
282	52	≥ 40 years	Female	Pus	Inpatient	Emergencies and ICU	Citrobacter spp	E-BLSE	Not detected	Not detected	Not detected	Not detected	Not detected	Susceptible	Susceptible	Resistant	Susceptible	Susceptible		Resistant		Resistant	Resistant	Susceptible
3117	1	< 40 years	Male	Urine	Outpatient		Escherichia coli	CRE	Not detected	Not detected	Not detected	Not detected	Not detected	Resistant	Resistant	Resistant	Resistant	Resistant	Susceptible	Resistant	Susceptible	Susceptible	Susceptible	Susceptible
3114	68	≥ 40 years	Male	Urine	Outpatient		Enterobacter spp	E-BLSE	Not detected	Not detected	Not detected	Not detected	Not detected	Susceptible	Susceptible	Resistant	Resistant	Resistant	Susceptible	Resistant	Susceptible	Susceptible	Susceptible	Susceptible
75	30	< 40 years	Male	Pus	Outpatient		Escherichia coli	E-BLSE	Not detected	Not detected	Not detected	Not detected	Not detected	Susceptible	Susceptible	Resistant	Resistant	Susceptible		Resistant		Susceptible	Susceptible	Susceptible
560	30	< 40 years	Male	Urine	Inpatient	Medical	Serratia liquefasciens	E-BLSE	Not detected	Not detected	Not detected	Not detected	Not detected	Susceptible	Susceptible	Resistant	Resistant	Resistant	Susceptible	Resistant	Susceptible	Susceptible	Susceptible	Susceptible
844	77	≥ 40 years	Male	Urine	Inpatient	Medical	Klebsiella oxytoca	E-BLSE	Not detected	Not detected	Not detected	Not detected	Not detected	Susceptible	Susceptible	Resistant	Resistant	Resistant	Susceptible	Resistant	Susceptible	Susceptible	Susceptible	Susceptible
1335	68	≥ 40 years	Male	Urine	Inpatient	Medical	Escherichia coli	E-BLSE	Not detected	Not detected	Not detected	Not detected	Not detected	Susceptible	Susceptible	Susceptible	Resistant	Resistant	Susceptible	Resistant	Susceptible	Susceptible	Susceptible	Susceptible
3	50	≥ 40 years	Male	Urine	Outpatient		Escherichia coli	E-BLSE	Not detected	Not detected	Not detected	Not detected	Not detected	Susceptible	Susceptible	Resistant	Resistant	Resistant	Susceptible	Resistant	Susceptible	Susceptible	Susceptible	Susceptible
702	41	≥ 40 years	Female	Urine	Outpatient		Escherichia coli	E-BLSE	Not detected	Not detected	Not detected	Not detected	Not detected	Susceptible	Susceptible	Resistant	Resistant	Resistant	Susceptible	Resistant	Susceptible	Susceptible	Susceptible	Susceptible
888	61	≥ 40 years	Male	Urine	Inpatient	Medical	Escherichia coli	E-BLSE	Not detected	Not detected	Not detected	Not detected	Not detected	Susceptible	Susceptible	Susceptible	Resistant	Resistant	Susceptible	Resistant	Susceptible	Susceptible	Susceptible	Susceptible
1347	0.66	< 40 years	Female	Urine	Inpatient	Emergencies and ICU	Escherichia coli	E-BLSE	Not detected	Not detected	Not detected	Not detected	Not detected	Susceptible	Resistant	Resistant	Resistant	Resistant	Susceptible	Susceptible	Susceptible	Susceptible	Susceptible	Susceptible
110	7	< 40 years	Male	Pus	Inpatient	Medical	Escherichia coli	E-BLSE	Not detected	Not detected	Not detected	Not detected	Not detected	Susceptible	Susceptible	Resistant	Resistant	Resistant		Resistant		Susceptible	Susceptible	Susceptible
703	70	≥ 40 years	Male	Urine	Inpatient	Medical	Escherichia coli	E-BLSE	Not detected	Not detected	Not detected	Not detected	Not detected	Susceptible	Susceptible	Resistant	Resistant	Resistant	Susceptible	Resistant	Susceptible	Susceptible	Susceptible	Susceptible
1319	70	≥ 40 years	Male	Urine	Outpatient		Escherichia coli	E-BLSE	Not detected	Not detected	Not detected	Not detected	Not detected	Susceptible	Susceptible	Resistant	Resistant	Resistant	Resistant	Resistant	Susceptible	Susceptible	Susceptible	Susceptible
1359	70	≥ 40 years	Male	Urine	Inpatient	Medical	Klebsiella Oxytoca	E-BLSE	Not detected	Not detected	Not detected	Not detected	Not detected	Susceptible	Susceptible	Resistant	Resistant	Resistant	Susceptible	Resistant	Resistant	Susceptible	Susceptible	Susceptible
112	11	< 40 years	Male	Pus	Outpatient		Escherichia coli	E-BLSE	Not detected	Not detected	Not detected	Not detected	Not detected	Susceptible	Susceptible	Susceptible	Susceptible	Susceptible		Resistant		Susceptible	Susceptible	Susceptible
720	23	< 40 years	Female	Urine	Inpatient	Emergencies and ICU	Escherichia coli	E-BLSE	Not detected	Not detected	Not detected	Not detected	Not detected	Susceptible	Susceptible	Resistant	Resistant	Resistant	Susceptible	Resistant	Susceptible	Susceptible	Susceptible	Susceptible
1320	63	≥ 40 years	Male	Urine	Inpatient	Emergencies and ICU	Escherichia coli	E-BLSE	Not detected	Not detected	Not detected	Not detected	Not detected	Susceptible	Susceptible	Resistant	Resistant	Resistant	Resistant	Resistant	Susceptible	Susceptible	Susceptible	Susceptible
1357	20	< 40 years	Female	Urine	Inpatient	Emergencies and ICU	Serratia marcescens	E-BLSE	Not detected	Not detected	Not detected	Not detected	Not detected	Susceptible	Susceptible	Susceptible	Resistant	Resistant	Resistant	Resistant	Susceptible	Susceptible	Resistant	Susceptible
306	62	≥ 40 years	Male	Pus	Outpatient		Escherichia coli	E-BLSE	Not detected	Not detected	Not detected	Not detected	Not detected	Susceptible	Susceptible	Resistant	Resistant	Resistant		Resistant		Susceptible	Susceptible	Susceptible
738	50	≥ 40 years	Male	Urine	Outpatient		Klebsiella pneumoniae	E-BLSE	Not detected	Not detected	Not detected	Not detected	Not detected	Susceptible	Susceptible	Resistant	Resistant	Resistant	Susceptible	Resistant	Susceptible	Resistant	Resistant	Susceptible
1322	60	≥ 40 years	Male	Urine	Inpatient	Emergencies and ICU	Klebsiella pneumoniae	E-BLSE	Not detected	Not detected	Not detected	Not detected	Not detected	Susceptible	Susceptible	Resistant	Resistant	Resistant	Susceptible	Resistant	Susceptible	Susceptible	Susceptible	Susceptible
1374	77	≥ 40 years	Male	Urine	Outpatient		Klebsiella Oxytoca	E-BLSE	Not detected	Not detected	Not detected	Not detected	Not detected	Susceptible	Susceptible	Resistant	Susceptible	Susceptible	Susceptible	Resistant	Susceptible	Susceptible	Susceptible	Susceptible
2327	66	≥ 40 years	Male	Urine	Inpatient	Medical	Klebsiella pneumoniae	E-BLSE	Not detected	Not detected	Not detected	Not detected	Not detected	Susceptible	Susceptible	Susceptible	Resistant	Resistant	Susceptible	Resistant	Susceptible	Susceptible	Susceptible	Susceptible
3274	7	< 40 years	Female	Urine	Outpatient		Escherichia coli	E-BLSE	Not detected	Not detected	Not detected	Not detected	Not detected	Susceptible	Susceptible	Resistant	Resistant	Resistant	Susceptible	Resistant	Susceptible	Susceptible	Susceptible	Susceptible
3288	62	≥ 40 years	Male	Urine	Inpatient	Medical	Escherichia coli	E-BLSE	Not detected	Not detected	Not detected	Not detected	Not detected	Susceptible	Susceptible	Resistant	Susceptible	Susceptible	Susceptible	Resistant	Susceptible	Susceptible	Susceptible	Susceptible
3293	1.83	< 40 years	Male	Urine	Inpatient	Medical	Escherichia coli	E-BLSE	Not detected	Not detected	Not detected	Not detected	Not detected	Susceptible	Susceptible	Resistant	Susceptible	Susceptible	Susceptible	Resistant	Resistant	Susceptible	Susceptible	Susceptible
3375	0.91	< 40 years	Male	Urine	Inpatient	Emergencies and ICU	Escherichia coli	E-BLSE	Not detected	Not detected	Not detected	Not detected	Not detected	Susceptible	Susceptible	Resistant	Resistant	Resistant	Susceptible	Susceptible	Susceptible	Susceptible	Susceptible	Susceptible
3279	85	≥ 40 years	Male	Urine	Inpatient	Medical	Escherichia coli	E-BLSE	Not detected	Not detected	Not detected	Not detected	Not detected	Susceptible	Susceptible	Susceptible	Resistant	Resistant	Susceptible	Susceptible	Susceptible	Susceptible	Susceptible	Susceptible
3287	1.58	< 40 years	Female	Urine	Inpatient	Medical	Escherichia coli	E-BLSE	Not detected	Not detected	Not detected	Not detected	Not detected	Susceptible	Susceptible	Susceptible	Susceptible	Susceptible	Susceptible	Susceptible	Susceptible	Susceptible	Susceptible	Susceptible
2920	0.8	< 40 years	Female	Urine	Inpatient	Medical	Klebsiella oxytoca	E-BLSE	Not detected	Not detected	Not detected	Not detected	Not detected	Susceptible	Susceptible	Susceptible	Resistant	Resistant	Susceptible	Resistant	Susceptible	Susceptible	Susceptible	Susceptible
2980	72	≥ 40 years	Male	Urine	Inpatient	Medical	Escherichia coli	E-BLSE	Not detected	Not detected	Not detected	Not detected	Not detected	Susceptible	Susceptible	Susceptible	Resistant	Resistant	Susceptible	Resistant	Susceptible	Susceptible	Susceptible	Susceptible
2833	60	≥ 40 years	Female	Urine	Inpatient	Medical	Klebsiella pneumoniae	E-BLSE	Not detected	Not detected	Not detected	Not detected	Not detected	Susceptible	Susceptible	Resistant	Resistant	Resistant	Susceptible	Resistant	Susceptible	Susceptible	Resistant	Susceptible
2929	68	≥ 40 years	Male	Urine	Inpatient	Medical	Escherichia coli	E-BLSE	Not detected	Not detected	Not detected	Not detected	Not detected	Susceptible	Susceptible	Susceptible	Resistant	Resistant	Susceptible	Resistant	Susceptible	Susceptible	Susceptible	Susceptible
258	4	< 40 years	Male	Pus	Inpatient	Surgical	Escherichia coli	E-BLSE	Not detected	Not detected	Not detected	Not detected	Not detected	Susceptible	Susceptible	Resistant	Resistant	Resistant		Resistant		Susceptible	Susceptible	Susceptible
513	0.75	< 40 years	Male	Stool	Inpatient	Emergencies and ICU	Escherichia coli	E-BLSE	Not detected	Not detected	Not detected	Not detected	Not detected	Susceptible	Susceptible	Susceptible	Resistant	Resistant		Resistant		Susceptible	Resistant	Susceptible
2786	50	≥ 40 years	Male	Urine	Inpatient	Medical	Escherichia coli	E-BLSE	Not detected	Not detected	Not detected	Not detected	Not detected	Susceptible	Susceptible	Resistant	Resistant	Resistant	Susceptible	Resistant	Susceptible	Susceptible	Susceptible	Susceptible
2958	70	≥ 40 years	Male	Urine	Inpatient	Medical	Klebsiella pneumoniae	E-BLSE	Not detected	Not detected	Not detected	Not detected	Not detected	Susceptible	Susceptible	Susceptible	Resistant	Resistant	Susceptible	Resistant	Susceptible	Susceptible	Resistant	Susceptible
2801	0.16	< 40 years	Male	Urine	Inpatient	Medical	klebsiella oxytoca	E-BLSE	Not detected	Not detected	Not detected	Not detected	Not detected	Susceptible	Susceptible	Resistant	Susceptible	Susceptible	Susceptible	Resistant	Susceptible	Susceptible	Resistant	Susceptible
2900	70	≥ 40 years	Female	Urine	Inpatient	Emergencies and ICU	Escherichia coli	E-BLSE	Not detected	Not detected	Not detected	Not detected	Not detected	Susceptible	Susceptible	Resistant	Resistant	Resistant	Susceptible	Resistant	Susceptible	Susceptible	Susceptible	Susceptible
2743	77	≥ 40 years	Male	Urine	Inpatient	Medical	klebsiella pneumoniae	E-BLSE	Not detected	Not detected	Not detected	Not detected	Not detected	Susceptible	Susceptible	Resistant	Resistant	Resistant	Susceptible	Resistant	Susceptible	Susceptible	Resistant	Susceptible
2948	80	≥ 40 years	Female	Urine	Inpatient	Medical	klebsiella pneumoniae	E-BLSE	Not detected	Not detected	Not detected	Not detected	Not detected	Susceptible	Susceptible	Resistant	Susceptible	Susceptible	Susceptible	Resistant	Susceptible	Susceptible	Resistant	Susceptible
2993	38	< 40 years	Male	Urine	Outpatient		Escherichia coli	E-BLSE	Not detected	Not detected	Not detected	Not detected	Not detected	Susceptible	Susceptible	Susceptible	Susceptible	Susceptible	Susceptible	Resistant	Susceptible	Susceptible	Susceptible	Susceptible
2772	0.5	< 40 years	Male	Urine	Inpatient	Emergencies and ICU	klebsiella pneumoniae	CRE	Not detected	Not detected	Detected	Not detected	NDM	Resistant	Susceptible	Resistant	Resistant	Resistant	Susceptible	Resistant	Susceptible	Susceptible	Susceptible	Susceptible
256	43	≥ 40 years	Female	Pus	Outpatient		Acinetobacter baumannii	CRAB	Not detected	Not detected	Not detected	Not detected	Not detected	Resistant	Resistant	Resistant	Resistant	Resistant		Resistant		Susceptible	Susceptible
3046	85	≥ 40 years	Male	Urine	Inpatient	Medical	Escherichia coli	CRE	Not detected	Not detected	Not detected	Not detected	Not detected	Resistant	Resistant	Resistant	Resistant	Resistant	Susceptible	Resistant	Susceptible	Susceptible	Resistant	Susceptible
2767	10	< 40 years	Female	Urine	Outpatient		Escherichia coli	E-BLSE	Not detected	Not detected	Not detected	Not detected	Not detected	Susceptible	Susceptible	Resistant	Resistant	Resistant	Susceptible	Resistant	Susceptible	Susceptible	Susceptible	Susceptible
2961	32	< 40 years	Male	Urine	Inpatient	Medical	Escherichia coli	E-BLSE	Not detected	Not detected	Not detected	Not detected	Not detected	Susceptible	Susceptible	Susceptible	Susceptible	Susceptible	Susceptible	Resistant	Susceptible	Susceptible	Susceptible	Susceptible
3034	50	≥ 40 years	Male	Urine	Inpatient	Medical	Escherichia coli	E-BLSE	Not detected	Not detected	Not detected	Not detected	Not detected	Susceptible	Susceptible	Susceptible	Susceptible	Susceptible	Susceptible	Resistant	Susceptible	Susceptible	Susceptible	Susceptible
3004	25	< 40 years	Male	Urine	Inpatient	Emergencies and ICU	Escherichia coli	E-BLSE	Not detected	Not detected	Not detected	Not detected	Not detected	Susceptible	Susceptible	Resistant	Resistant	Resistant	Susceptible	Resistant	Susceptible	Susceptible	Susceptible	Susceptible
2959	67	≥ 40 years	Male	Urine	Inpatient	Medical	klebsiella pneumoniae	E-BLSE	Not detected	Not detected	Not detected	Not detected	Not detected	Susceptible	Susceptible	Resistant	Resistant	Resistant	Susceptible	Resistant	Susceptible	Susceptible	Susceptible	Susceptible
1333	67	≥ 40 years	Male	Urine	Outpatient		Escherichia coli	E-BLSE	Not detected	Not detected	Not detected	Not detected	Not detected	Susceptible	Susceptible	Resistant	Resistant	Resistant	Susceptible	Resistant	Susceptible	Susceptible	Susceptible	Susceptible
1077	55	≥ 40 years	Male	Urine	Inpatient	Medical	klebsiella pneumoniae	E-BLSE	Not detected	Not detected	Not detected	Not detected	Not detected	Susceptible	Susceptible	Resistant	Resistant	Resistant	Susceptible	Resistant	Susceptible	Susceptible	Susceptible	Susceptible
3320	80	≥ 40 years	Male	Urine	Inpatient	Medical	Serratia odorifera	E-BLSE	Not detected	Not detected	Not detected	Not detected	Not detected	Susceptible	Susceptible	Resistant	Resistant	Resistant	Susceptible	Resistant	Resistant	Susceptible	Susceptible	Susceptible
801	60	≥ 40 years	Female	Urine	Inpatient	Medical	Klebsiella oxytoca	E-BLSE	Not detected	Not detected	Not detected	Not detected	Not detected	Susceptible	Susceptible	Resistant	Resistant	Resistant	Susceptible	Resistant	Susceptible	Susceptible	Susceptible	Susceptible
423	85	≥ 40 years	Male	Urine	Inpatient	Medical	klebsiella pneumoniae	E-BLSE	Not detected	Not detected	Not detected	Not detected	Not detected	Susceptible	Susceptible	Resistant	Susceptible	Susceptible	Susceptible	Resistant	Susceptible	Susceptible	Susceptible	Susceptible
1073	64	≥ 40 years	Male	Urine	Inpatient	Medical	Escherichia coli	E-BLSE	Not detected	Not detected	Not detected	Not detected	Not detected	Susceptible	Susceptible	Resistant	Resistant	Resistant	Resistant	Resistant	Resistant	Susceptible	Susceptible	Susceptible
842	86	≥ 40 years	Male	Urine	Inpatient	Medical	Pantoea spp	E-BLSE	Not detected	Not detected	Not detected	Not detected	Not detected	Susceptible	Resistant	Resistant	Resistant	Resistant	Resistant	Resistant	Susceptible	Susceptible	Susceptible	Susceptible
1393	77	≥ 40 years	Female	Urine	Outpatient		Pantoea spp	E-BLSE	Not detected	Not detected	Not detected	Not detected	Not detected	Susceptible	Susceptible	Susceptible	Resistant	Resistant	Susceptible	Resistant	Susceptible	Susceptible	Susceptible	Susceptible
960	44	≥ 40 years	Female	Urine	Outpatient		Pantoea spp	E-BLSE	Not detected	Not detected	Not detected	Not detected	Not detected	Susceptible	Susceptible	Susceptible	Resistant	Resistant	Resistant	Resistant	Susceptible	Susceptible	Susceptible	Susceptible
3303	72	≥ 40 years	Male	Urine	Inpatient	Medical	Proteus mirabilis	E-BLSE	Not detected	Not detected	Not detected	Not detected	Not detected	Susceptible	Susceptible	Susceptible	Susceptible	Susceptible	Resistant	Resistant	Susceptible	Susceptible	Susceptible	Susceptible
889	10	< 40 years	Male	Urine	Inpatient	Medical	Escherichia coli	E-BLSE	Not detected	Not detected	Not detected	Not detected	Not detected	Susceptible	Susceptible	Susceptible	Resistant	Resistant	Resistant	Resistant	Susceptible	Susceptible	Susceptible	Susceptible
308	3	< 40 years	Male	Pus	Inpatient	Surgical	Escherichia coli	E-BLSE	Not detected	Not detected	Not detected	Not detected	Not detected	Susceptible	Resistant	Resistant	Resistant	Resistant		Resistant		Susceptible	Susceptible	Susceptible
831	45	≥ 40 years	Male	Urine	Inpatient	Medical	Klebsiella oxytoca	E-BLSE	Not detected	Not detected	Not detected	Not detected	Not detected	Susceptible	Resistant	Resistant	Resistant	Resistant	Resistant	Resistant	Susceptible	Susceptible	Susceptible	Susceptible
1346	71	≥ 40 years	Female	Urine	Inpatient	Medical	Pantoea spp	E-BLSE	Not detected	Not detected	Not detected	Not detected	Not detected	Susceptible	Susceptible	Resistant	Resistant	Resistant	Susceptible	Resistant	Susceptible	Susceptible	Susceptible	Susceptible
6	60	≥ 40 years	Male	Pus	Inpatient	Medical	Klebsiella pneumoniae	CRE	Not detected	Not detected	Not detected	Not detected	Not detected	Resistant	Resistant	Resistant	Resistant	Resistant		Resistant		Resistant	Resistant	Susceptible
443	61	≥ 40 years	Male	Urine	Outpatient		Escherichia coli	E-BLSE	Not detected	Not detected	Not detected	Not detected	Not detected	Susceptible	Susceptible	Susceptible	Resistant	Resistant	Susceptible	Resistant	Susceptible	Susceptible	Susceptible	Susceptible
803	22	< 40 years	Male	Urine	Outpatient		Escherichia coli	E-BLSE	Not detected	Not detected	Not detected	Not detected	Not detected	Susceptible	Susceptible	Resistant	Resistant	Resistant	Susceptible	Resistant	Susceptible	Susceptible	Susceptible	Susceptible
1326	55	≥ 40 years	Male	Urine	Outpatient		Pantoea spp	E-BLSE	Not detected	Not detected	Not detected	Not detected	Not detected	Susceptible	Susceptible	Susceptible	Resistant	Resistant	Susceptible	Resistant	Susceptible	Susceptible	Susceptible	Susceptible
719	42	≥ 40 years	Male	Urine	Inpatient	Medical	Escherichia coli	E-BLSE	Not detected	Not detected	Not detected	Not detected	Not detected	Susceptible	Susceptible	Resistant	Resistant	Resistant	Susceptible	Resistant	Susceptible	Susceptible	Susceptible	Susceptible
1086	67	≥ 40 years	Male	Urine	Inpatient	Medical	Serratia odorifera	E-BLSE	Not detected	Not detected	Not detected	Not detected	Not detected	Susceptible	Susceptible	Resistant	Resistant	Resistant	Susceptible	Resistant	Susceptible	Susceptible	Susceptible	Susceptible
1080	84	≥ 40 years	Male	Urine	Inpatient	Medical	Klebsiella pneumoniae	E-BLSE	Not detected	Not detected	Not detected	Not detected	Not detected	Susceptible	Susceptible	Resistant	Resistant	Resistant	Susceptible	Resistant	Resistant	Resistant	Susceptible	Susceptible
435	77	≥ 40 years	Male	Urine	Inpatient	Medical	Escherichia coli	E-BLSE	Not detected	Not detected	Not detected	Not detected	Not detected	Susceptible	Susceptible	Susceptible	Resistant	Resistant	Susceptible	Resistant	Susceptible	Susceptible	Susceptible	Resistant
354	24	< 40 years	Male	Pus	Outpatient		Escherichia coli	E-BLSE	Not detected	Not detected	Not detected	Not detected	Not detected	Susceptible	Susceptible	Resistant	Resistant	Resistant		Resistant		Susceptible	Susceptible	Susceptible
550	51	≥ 40 years	Male	Urine	Inpatient	Emergencies and ICU	Escherichia coli	E-BLSE	Not detected	Not detected	Not detected	Not detected	Not detected	Susceptible	Susceptible	Resistant	Resistant	Resistant	Susceptible	Resistant	Susceptible	Susceptible	Susceptible	Susceptible
137	38	< 40 years	Male	Pus	Inpatient	Emergencies and ICU	Escherichia coli	E-BLSE	Not detected	Not detected	Not detected	Not detected	Not detected	Susceptible	Susceptible	Susceptible	Susceptible	Susceptible		Resistant		Susceptible	Susceptible	Susceptible
2380	7	< 40 years	Male	Urine	Inpatient	Medical	Escherichia coli	CRE	Not detected	Not detected	Not detected	Not detected	Not detected	Resistant	Susceptible	Resistant	Resistant	Resistant	Susceptible	Resistant	Susceptible	Susceptible	Susceptible	Susceptible
276	4	< 40 years	Female	Pus	Outpatient		Escherichia coli	E-BLSE	Not detected	Not detected	Not detected	Not detected	Not detected	Susceptible	Susceptible	Susceptible	Resistant	Resistant		Resistant		Susceptible	Susceptible	Resistant
26	48	≥ 40 years	Male	Pus	Outpatient		Escherichia coli	E-BLSE	Not detected	Not detected	Not detected	Not detected	Not detected	Susceptible	Susceptible	Susceptible	Resistant	Resistant		Resistant		Susceptible	Susceptible	Susceptible
54	58	≥ 40 years	Male	Pus	Outpatient		Klebsiella pneumoniae	CRE	Not detected	Not detected	Not detected	Not detected	Not detected	Resistant	Susceptible	Resistant	Resistant	Resistant		Resistant		Susceptible	Susceptible	Resistant
2065	50	≥ 40 years	Male	Urine	Inpatient	Medical	Escherichia coli	CRE	Not detected	Not detected	Not detected	Not detected	Not detected	Resistant	Susceptible	Resistant	Resistant	Resistant	Susceptible	Resistant	Susceptible	Susceptible	Susceptible	Resistant
318	14	< 40 years	Male	Pus	Inpatient	Emergencies and ICU	Escherichia coli	E-BLSE	Not detected	Not detected	Not detected	Not detected	Not detected	Susceptible	Susceptible	Susceptible	Resistant	Resistant		Resistant		Susceptible	Susceptible	Resistant
319	10	< 40 years	Male	Pus	Inpatient	Emergencies and ICU	Escherichia coli	E-BLSE	Not detected	Not detected	Not detected	Not detected	Not detected	Susceptible	Susceptible	Resistant	Resistant	Resistant		Resistant		Susceptible	Susceptible	Susceptible
320	20	< 40 years	Female	Pus	Inpatient	Emergencies and ICU	Escherichia coli	E-BLSE	Not detected	Not detected	Not detected	Not detected	Not detected	Susceptible	Susceptible	Susceptible	Resistant	Resistant		Resistant		Susceptible	Susceptible	Susceptible
3379	2	< 40 years	Male	Urine	Inpatient	Surgical	Escherichia coli	E-BLSE	Not detected	Not detected	Not detected	Not detected	Not detected	Susceptible	Susceptible	Susceptible	Susceptible	Susceptible	Resistant	Resistant	Susceptible	Susceptible	Susceptible	Susceptible
3352	43	≥ 40 years	Female	Urine	Outpatient		Klebsiella pneumoniae	E-BLSE	Not detected	Not detected	Not detected	Not detected	Not detected	Susceptible	Susceptible	Resistant	Resistant	Resistant	Resistant	Resistant	Resistant	Resistant	Susceptible	Susceptible
3340	0.09	< 40 years	Male	Urine	Inpatient	Emergencies and ICU	Klebsiella pneumoniae	E-BLSE	Not detected	Not detected	Not detected	Not detected	Not detected	Susceptible	Susceptible	Resistant	Resistant	Resistant	Resistant	Resistant	Resistant	Susceptible	Susceptible	Susceptible
3472	97	≥ 40 years	Male	Urine	Inpatient	Medical	Klebsiella pneumoniae	E-BLSE	Not detected	Not detected	Not detected	Not detected	Not detected	Susceptible	Susceptible	Resistant	Resistant	Resistant	Susceptible	Resistant	Resistant	Susceptible	Susceptible	Susceptible
3465	65	≥ 40 years	Male	Urine	Inpatient	Medical	Escherichia coli	CRE	Not detected	Not detected	Not detected	Not detected	Not detected	Resistant	Susceptible	Resistant	Resistant	Resistant	Susceptible	Resistant	Susceptible	Susceptible	Susceptible	Susceptible
3492	70	≥ 40 years	Male	Urine	Inpatient	Medical	Escherichia coli	E-BLSE	Not detected	Not detected	Not detected	Not detected	Not detected	Susceptible	Susceptible	Susceptible	Susceptible	Susceptible	Susceptible	Resistant	Susceptible	Susceptible	Susceptible	Susceptible
3486	60	≥ 40 years	Male	Urine	Inpatient	Medical	Escherichia coli	E-BLSE	Not detected	Not detected	Not detected	Not detected	Not detected	Susceptible	Susceptible	Susceptible	Resistant	Resistant	Susceptible	Resistant	Susceptible	Susceptible	Susceptible	Susceptible
3483	30	< 40 years	Female	Urine	Outpatient		Escherichia coli	CRE	Not detected	Not detected	Not detected	Not detected	Not detected	Resistant	Susceptible	Susceptible	Resistant	Resistant	Susceptible	Resistant	Susceptible	Susceptible	Susceptible	Resistant
333	4	< 40 years	Male	Pus	Inpatient	Emergencies and ICU	Escherichia coli	E-BLSE	Not detected	Not detected	Not detected	Not detected	Not detected	Susceptible	Susceptible	Resistant	Resistant	Resistant		Resistant		Susceptible	Susceptible	Resistant
3466	44	≥ 40 years	Male	Urine	Inpatient	Medical	Proteus mirabilis	E-BLSE	Not detected	Not detected	Not detected	Not detected	Not detected	Susceptible	Susceptible	Susceptible	Resistant	Resistant	Susceptible	Resistant	Susceptible	Susceptible	Susceptible	Susceptible
2967	35	< 40 years	Female	Urine	Outpatient		Escherichia coli	E-BLSE	Not detected	Not detected	Not detected	Not detected	Not detected	Susceptible	Susceptible	Susceptible	Susceptible	Susceptible	Susceptible	Resistant	Susceptible	Susceptible	Susceptible	Susceptible
2274	23	< 40 years	Female	Urine	Outpatient		Escherichia coli	E-BLSE	Not detected	Not detected	Not detected	Not detected	Not detected	Susceptible	Susceptible	Resistant	Susceptible	Susceptible	Susceptible	Resistant	Resistant	Susceptible	Susceptible	Susceptible
3186	41	≥ 40 years	Male	Urine	Inpatient	Medical	Pseudomonas aeruginosa	CRPA	Not detected	Not detected	Not detected	Not detected	Not detected	Resistant	Resistant		Resistant	Resistant		Resistant	Resistant	Resistant	Resistant	Susceptible
4782	71	≥ 40 years	Male	Urine	Inpatient	Medical	Pseudomonas aeruginosa	CRPA	Not detected	Not detected	Not detected	Not detected	Not detected	Resistant	Resistant		Resistant	Resistant		Resistant	Resistant	Resistant	Resistant	Resistant
2898	66	≥ 40 years	Male	Urine	Inpatient	Medical	Klebsiella pneumoniae	E-BLSE	Not detected	Not detected	Not detected	Not detected	Not detected	Susceptible	Susceptible	Susceptible	Resistant	Resistant	Susceptible	Resistant	Susceptible	Susceptible	Susceptible	Resistant
499	40	≥ 40 years	Male	Pus	Inpatient	Emergencies and ICU	Proteus mirabilis	CRE	Not detected	Not detected	Not detected	Not detected	Not detected	Resistant	Susceptible	Susceptible	Susceptible	Susceptible		Resistant		Susceptible	Resistant	Resistant
946	56	≥ 40 years	Female	Pus	Inpatient	Emergencies and ICU	Acinetobacter baumannii	CRAB	Not detected	Not detected	Not detected	Not detected	Not detected	Resistant	Resistant	Resistant	Resistant	Resistant		Resistant			Resistant
959	36	< 40 years	Male	Urine	Outpatient		Escherichia coli	CRE	Not detected	Not detected	Not detected	Not detected	Not detected	Resistant	Susceptible	Resistant	Resistant	Resistant	Susceptible	Resistant	Susceptible	Susceptible	Susceptible	Susceptible
1305	85	≥ 40 years	Male	Urine	Inpatient	Medical	Acinetobacter baumannii	CRAB	Not detected	Not detected	Not detected	Not detected	Not detected	Resistant	Resistant	Resistant	Resistant	Resistant		Resistant			Susceptible
2587	70	≥ 40 years	Male	Urine	Outpatient		Pseudomonas aeruginosa	CRPA	Not detected	Not detected	Not detected	Not detected	Not detected	Resistant	Susceptible		Resistant	Resistant		Resistant	Susceptible	Resistant	Resistant	Susceptible
3196	66	≥ 40 years	Male	Urine	Inpatient	Medical	Acinetobacter baumannii	CRAB	Not detected	Not detected	Not detected	Not detected	Not detected	Resistant	Resistant	Resistant	Resistant	Resistant		Resistant			Susceptible
3322	67	≥ 40 years	Male	Urine	Inpatient	Medical	Acinetobacter baumannii	CRAB	Not detected	Not detected	Not detected	Not detected	Not detected	Resistant	Resistant	Resistant	Resistant	Susceptible		Resistant			Susceptible
3566	90	≥ 40 years	Male	Urine	Inpatient	Medical	Acinetobacter baumannii	CRAB	Not detected	Not detected	Not detected	Not detected	Not detected	Resistant	Susceptible	Resistant	Resistant	Susceptible		Resistant			Susceptible
4990	70	≥ 40 years	Male	Urine	Inpatient	Medical	Escherichia coli	CRE	Not detected	Not detected	Not detected	Not detected	Not detected	Resistant	Susceptible	Susceptible	Resistant	Resistant	Susceptible	Resistant	Susceptible	Susceptible	Susceptible	Resistant
4991	68	≥ 40 years	Male	Urine	Inpatient	Medical	Escherichia coli	CRE	Not detected	Not detected	Not detected	Not detected	Not detected	Resistant	Susceptible	Resistant	Resistant	Resistant	Susceptible	Resistant	Susceptible	Susceptible	Susceptible	Resistant
102	40	≥ 40 years	Female	Urine	Outpatient		Escherichia coli	E-BLSE	Not detected	Not detected	Not detected	Not detected	Not detected	Susceptible	Susceptible	Susceptible	Resistant	Resistant	Susceptible	Susceptible	Susceptible	Susceptible	Susceptible	Susceptible
3080	11	< 40 years	Male	Urine	Inpatient	Emergencies and ICU	Escherichia coli	E-BLSE	Not detected	Not detected	Not detected	Not detected	Not detected	Susceptible	Resistant	Resistant	Resistant	Resistant	Susceptible	Resistant	Susceptible	Susceptible	Susceptible	Susceptible
2473	16	< 40 years	Male	Urine	Outpatient		Escherichia coli	E-BLSE	Not detected	Not detected	Not detected	Not detected	Not detected	Susceptible	Susceptible	Resistant	Susceptible	Susceptible	Susceptible	Resistant	Resistant	Susceptible	Susceptible	Susceptible
3275	17	< 40 years	Male	Urine	Inpatient	Medical	Escherichia coli	E-BLSE	Not detected	Not detected	Not detected	Not detected	Not detected	Susceptible	Susceptible	Susceptible	Resistant	Resistant	Susceptible	Resistant	Susceptible	Susceptible	Susceptible	Susceptible
199	19	< 40 years	Female	Pus	Inpatient	Medical	Escherichia coli	E-BLSE	Not detected	Not detected	Not detected	Not detected	Not detected	Susceptible	Susceptible	Resistant	Susceptible	Susceptible		Resistant		Susceptible	Susceptible	Susceptible
2200	66	≥ 40 years	Male	Urine	Outpatient		Escherichia coli	E-BLSE	Not detected	Not detected	Not detected	Not detected	Not detected	Susceptible	Resistant	Resistant	Resistant	Resistant	Susceptible	Resistant	Susceptible	Susceptible	Susceptible	Susceptible
513	0.75	< 40 years	Male	Stool	Inpatient	Medical	Escherichia coli	E-BLSE	Not detected	Not detected	Not detected	Not detected	Not detected	Susceptible	Susceptible	Susceptible	Resistant	Resistant		Resistant		Susceptible	Susceptible	Susceptible
3443	64	≥ 40 years	Male	Urine	Inpatient	Emergencies and ICU	Escherichia coli	E-BLSE	Not detected	Not detected	Not detected	Not detected	Not detected	Susceptible	Susceptible	Resistant	Resistant	Resistant	Susceptible	Resistant	Susceptible	Susceptible	Susceptible	Susceptible
325	60	≥ 40 years	Male	Pus	Inpatient	Emergencies and ICU	Klebsiella pneumoniae	E-BLSE	Not detected	Not detected	Not detected	Not detected	Not detected	Susceptible	Susceptible	Susceptible	Susceptible	Susceptible		Susceptible		Susceptible	Susceptible	Susceptible
193	18	< 40 years	Male	Pus	Inpatient	Surgical	Pseudomonas aeruginosa	CRPA	Not detected	Not detected	Not detected	Not detected	Not detected	Resistant	Susceptible		Resistant	Resistant		Resistant		Resistant	Resistant	Susceptible
3129	60	≥ 40 years	Male	Urine	Inpatient	Medical	Klebsiella pneumoniae	CRE	Not detected	Detected	Not detected	Not detected	VIM	Resistant	Susceptible	Susceptible	Susceptible	Susceptible	Resistant	Resistant	Susceptible	Resistant	Resistant	Susceptible
2907	51	≥ 40 years	Male	Urine	Inpatient	Medical	Escherichia coli	CRE	Not detected	Not detected	Not detected	Not detected	Not detected	Resistant	Susceptible	Resistant	Resistant	Resistant	Resistant	Resistant	Resistant	Susceptible	Susceptible	Susceptible
2284	77	≥ 40 years	Male	Urine	Outpatient		Pantoea spp	E-BLSE	Not detected	Not detected	Not detected	Not detected	Not detected	Susceptible	Susceptible	Resistant	Susceptible	Susceptible	Susceptible	Resistant	Susceptible	Susceptible	Susceptible	Susceptible
166	21	< 40 years	Female	Urine	Outpatient		Klebsiella pneumoniae	CRE	Not detected	Not detected	Not detected	Detected	OXA-48	Resistant	Resistant	Resistant	Resistant	Resistant	Resistant	Resistant	Resistant	Susceptible	Susceptible	Susceptible
22	40	≥ 40 years	Male	Pus	Outpatient		Escherichia coli	E-BLSE	Not detected	Not detected	Not detected	Not detected	Not detected	Susceptible	Susceptible	Susceptible	Susceptible	Susceptible		Resistant		Susceptible	Susceptible	Susceptible
470	44	≥ 40 years	Male	Urine	Inpatient	Medical	Escherichia coli	CRE	Not detected	Not detected	Not detected	Not detected	Not detected	Resistant	Resistant	Resistant	Resistant	Resistant	Susceptible	Resistant	Susceptible	Resistant	Resistant	Susceptible
1628	48	≥ 40 years	Female	Urine	Inpatient	Medical	Hafnia alvei	CRE	Not detected	Not detected	Not detected	Not detected	Not detected	Resistant	Resistant	Resistant	Resistant	Resistant	Susceptible	Resistant	Resistant	Resistant	Resistant	Susceptible
1409	18	< 40 years	Male	Urine	Inpatient	Medical	Escherichia coli	CRE	Not detected	Not detected	Not detected	Not detected	Not detected	Resistant	Susceptible	Resistant	Resistant	Resistant	Susceptible	Resistant	Susceptible	Susceptible	Susceptible	Susceptible
22	21	< 40 years	Female	Pus	Inpatient	Medical	Citrobacter spp	E-BLSE	Not detected	Not detected	Not detected	Not detected	Not detected	Susceptible	Susceptible	Resistant	Susceptible	Susceptible		Resistant		Susceptible	Susceptible	Susceptible
239	55	≥ 40 years	Male	Urine	Outpatient		Escherichia coli	E-BLSE	Not detected	Not detected	Not detected	Not detected	Not detected	Susceptible	Susceptible	Susceptible	Resistant	Resistant	Susceptible	Resistant	Susceptible	Susceptible	Susceptible	Resistant
172	15	< 40 years	Female	Urine	Inpatient	Medical	Escherichia coli	E-BLSE	Not detected	Not detected	Not detected	Not detected	Not detected	Susceptible	Susceptible	Susceptible	Resistant	Resistant	Susceptible	Resistant	Susceptible	Susceptible	Susceptible	Susceptible
18	30	< 40 years	Male	Pus	Outpatient		Escherichia coli	E-BLSE	Not detected	Not detected	Not detected	Not detected	Not detected	Susceptible	Susceptible	Susceptible	Susceptible	Susceptible		Resistant		Susceptible	Susceptible	Susceptible
251	70	≥ 40 years	Male	Urine	Outpatient		Klebsiella oxytoca	CRE	Not detected	Not detected	Not detected	Not detected	Not detected	Resistant	Susceptible	Susceptible	Resistant	Resistant	Susceptible	Resistant	Susceptible	Susceptible	Susceptible	Susceptible
262	80	≥ 40 years	Female	Urine	Outpatient		Klebsiella pneumoniae	E-BLSE	Not detected	Not detected	Not detected	Not detected	Not detected	Susceptible	Susceptible	Resistant	Resistant	Resistant	Susceptible	Resistant	Susceptible	Susceptible	Susceptible	Susceptible
291	5	< 40 years	Female	Urine	Outpatient		Escherichia coli	CRE	Not detected	Not detected	Detected	Not detected	NDM	Resistant	Susceptible	Resistant	Resistant	Resistant	Resistant	Resistant	Resistant	Susceptible	Susceptible	Resistant
1510	37	< 40 years	Male	Urine	Outpatient		Serratia odorifera	E-BLSE	Not detected	Not detected	Not detected	Not detected	Not detected	Susceptible	Susceptible	Susceptible	Susceptible	Susceptible	Resistant	Resistant	Resistant	Susceptible	Susceptible	Susceptible
1521	60	≥ 40 years	Male	Urine	Inpatient	Medical	Klebsiella pneumoniae	E-BLSE	Not detected	Not detected	Not detected	Not detected	Not detected	Susceptible	Susceptible	Susceptible	Resistant	Resistant	Susceptible	Resistant	Susceptible	Susceptible	Susceptible	Susceptible
87	18	< 40 years	Male	Urine	Inpatient	Medical	Klebsiella pneumoniae	E-BLSE	Not detected	Not detected	Not detected	Not detected	Not detected	Susceptible	Susceptible	Resistant	Susceptible	Susceptible	Susceptible	Resistant	Susceptible	Susceptible	Susceptible	Susceptible
141	42	≥ 40 years	Male	Urine	Inpatient	Medical	Klebsiella pneumoniae	E-BLSE	Not detected	Not detected	Not detected	Not detected	Not detected	Susceptible	Susceptible	Susceptible	Resistant	Resistant	Susceptible	Resistant	Susceptible	Susceptible	Susceptible	Susceptible
65	9	< 40 years	Female	Urine	Inpatient	Medical	Escherichia coli	E-BLSE	Not detected	Not detected	Not detected	Not detected	Not detected	Susceptible	Resistant	Resistant	Resistant	Resistant	Susceptible	Resistant	Susceptible	Susceptible	Susceptible	Susceptible
1512	24	< 40 years	Female	Urine	Inpatient	Medical	Escherichia coli	E-BLSE	Not detected	Not detected	Not detected	Not detected	Not detected	Susceptible	Susceptible	Susceptible	Resistant	Resistant	Resistant	Resistant	Susceptible	Susceptible	Susceptible	Susceptible
1514	10	< 40 years	Male	Urine	Inpatient	Medical	Escherichia coli	E-BLSE	Not detected	Not detected	Not detected	Not detected	Not detected	Susceptible	Susceptible	Susceptible	Resistant	Resistant	Susceptible	Resistant	Susceptible	Susceptible	Susceptible	Susceptible
44	30	< 40 years	Male	Urine	Inpatient	Emergencies and ICU	Escherichia coli	E-BLSE	Not detected	Not detected	Not detected	Not detected	Not detected	Susceptible	Susceptible	Resistant	Resistant	Resistant	Susceptible	Resistant	Susceptible	Susceptible	Susceptible	Susceptible
241	1.33	< 40 years	Female	Pus	Inpatient	Medical	Klebsiella pneumoniae	CRE	Not detected	Not detected	Not detected	Not detected	Not detected	Resistant	Resistant	Resistant	Resistant	Resistant		Resistant		Susceptible	Susceptible	Resistant
376	22	< 40 years	Male	Pus	Inpatient	Emergencies and ICU	Escherichia coli	E-BLSE	Not detected	Not detected	Not detected	Not detected	Not detected	Susceptible	Susceptible	Susceptible	Resistant	Resistant		Resistant		Susceptible	Susceptible	Susceptible
139	54	≥ 40 years	Male	Urine	Inpatient	Medical	Escherichia coli	CRE	Not detected	Not detected	Detected	Not detected	NDM	Resistant	Susceptible	Susceptible	Resistant	Resistant	Susceptible	Resistant	Susceptible	Susceptible	Susceptible	Resistant
99	58	≥ 40 years	Male	Urine	Inpatient	Medical	Escherichia coli	E-BLSE	Not detected	Not detected	Not detected	Not detected	Not detected	Susceptible	Susceptible	Resistant	Resistant	Resistant	Susceptible	Resistant	Susceptible	Susceptible	Susceptible	Susceptible
463	25	< 40 years	Female	Urine	Inpatient	Surgical	Acinetobacter baumannii	CRAB	Not detected	Not detected	Not detected	Not detected	Not detected	Resistant	Susceptible	Susceptible	Resistant	Resistant		Resistant			Resistant
48	19	< 40 years	Male	Urine	Inpatient	Medical	Escherichia coli	E-BLSE	Not detected	Not detected	Not detected	Not detected	Not detected	Susceptible	Susceptible	Resistant	Resistant	Resistant	Susceptible	Resistant	Resistant	Susceptible	Susceptible	Susceptible
1540	7	< 40 years	Male	Urine	Inpatient	Emergencies and ICU	Escherichia coli	E-BLSE	Not detected	Not detected	Not detected	Not detected	Not detected	Susceptible	Susceptible	Resistant	Susceptible	Susceptible	Susceptible	Resistant		Susceptible	Susceptible	Susceptible
432	72	≥ 40 years	Female	Urine	Outpatient		Klebsiella oxytoca	E-BLSE	Not detected	Not detected	Not detected	Not detected	Not detected	Susceptible	Resistant	Resistant	Resistant	Resistant	Susceptible	Resistant	Susceptible	Susceptible	Susceptible	Susceptible
267	70	≥ 40 years	Female	Urine	Inpatient	Medical	Escherichia coli	CRE	Not detected	Not detected	Not detected	Not detected	Not detected	Resistant	Susceptible	Resistant	Resistant	Resistant	Susceptible	Resistant	Resistant	Susceptible	Susceptible	Resistant
320	20	< 40 years	Female	abdominal fluid	Inpatient	Emergencies and ICU	Escherichia coli	E-BLSE	Not detected	Not detected	Not detected	Not detected	Not detected	Susceptible	Susceptible	Susceptible	Resistant	Resistant		Resistant		Susceptible	Susceptible	Susceptible
1394	27	< 40 years	Male	Urine	Inpatient	Medical	Proteus mirabilis	E-BLSE	Not detected	Not detected	Not detected	Not detected	Not detected	Susceptible	Susceptible	Susceptible	Resistant	Resistant	Susceptible	Resistant	Susceptible	Susceptible	Susceptible	Susceptible
391	62	≥ 40 years	Male	Urine	Inpatient	Emergencies and ICU	Klebsiella pneumoniae	CRE	Not detected	Not detected	Not detected	Not detected	Not detected	Resistant	Resistant	Resistant	Resistant	Resistant	Susceptible	Resistant	Susceptible	Susceptible	Susceptible	Susceptible
182	22	< 40 years	Male	Pus	Inpatient	Emergencies and ICU	Escherichia coli	E-BLSE	Not detected	Not detected	Not detected	Not detected	Not detected	Susceptible	Susceptible	Resistant	Susceptible	Susceptible		Resistant		Susceptible	Susceptible	Susceptible
38	3	< 40 years	Male	Pus	Inpatient	Emergencies and ICU	Escherichia coli	E-BLSE	Not detected	Not detected	Not detected	Not detected	Not detected	Susceptible	Resistant	Resistant	Susceptible	Susceptible		Resistant		Susceptible	Susceptible	Susceptible
397	75	≥ 40 years	Male	Urine	Inpatient	Medical	Escherichia coli	E-BLSE	Not detected	Not detected	Not detected	Not detected	Not detected	Susceptible	Susceptible	Resistant	Resistant	Resistant	Susceptible	Resistant	Susceptible	Susceptible	Susceptible	Susceptible
91	14	< 40 years	Male	Pus	Inpatient	Surgical	Escherichia coli	E-BLSE	Not detected	Not detected	Not detected	Not detected	Not detected	Susceptible	Susceptible	Resistant	Resistant	Resistant		Susceptible		Susceptible	Susceptible	Susceptible
355	62	≥ 40 years	Male	Urine	Inpatient	Medical	Escherichia coli	E-BLSE	Not detected	Not detected	Not detected	Not detected	Not detected	Susceptible	Susceptible	Resistant	Resistant	Resistant	Susceptible	Resistant	Susceptible	Susceptible	Susceptible	Susceptible
43	65	≥ 40 years	Male	Urine	Inpatient	Medical	Escherichia coli	E-BLSE	Not detected	Not detected	Not detected	Not detected	Not detected	Susceptible	Susceptible	Resistant	Resistant	Resistant	Susceptible	Resistant	Susceptible	Susceptible	Susceptible	Susceptible
1115	4	< 40 years	Female	Urine	Inpatient	Medical	Escherichia coli	E-BLSE	Not detected	Not detected	Not detected	Not detected	Not detected	Susceptible	Susceptible	Resistant	Resistant	Resistant	Susceptible	Resistant	Susceptible	Susceptible	Susceptible	Susceptible
1350	7	< 40 years	Male	Urine	Inpatient	Surgical	Escherichia coli	E-BLSE	Not detected	Not detected	Not detected	Not detected	Not detected	Susceptible	Susceptible	Susceptible	Resistant	Resistant	Susceptible	Resistant	Susceptible	Susceptible	Susceptible	Susceptible
1107	4	< 40 years	Female	Urine	Inpatient	Medical	Escherichia coli	E-BLSE	Not detected	Not detected	Not detected	Not detected	Not detected	Susceptible	Susceptible	Resistant	Resistant	Resistant	Susceptible	Resistant	Susceptible	Susceptible	Susceptible	Susceptible
40	65	≥ 40 years	Male	Urine	Inpatient	Medical	Escherichia coli	CRE	Not detected	Not detected	Not detected	Not detected	Not detected	Resistant	Resistant	Resistant	Resistant	Resistant	Susceptible	Susceptible		Susceptible	Susceptible	Susceptible
1091	11	< 40 years	Male	Urine	Inpatient	Surgical	Pantoea spp	E-BLSE	Not detected	Not detected	Not detected	Not detected	Not detected	Susceptible	Susceptible	Resistant	Resistant	Resistant	Susceptible	Susceptible	Susceptible	Susceptible	Susceptible	Susceptible
248	1	< 40 years	Female	Urine	Outpatient		Escherichia coli	E-BLSE	Not detected	Not detected	Not detected	Not detected	Not detected	Susceptible	Susceptible	Susceptible	Resistant	Resistant	Susceptible	Resistant	Susceptible	Susceptible	Susceptible	Susceptible
1366	2	< 40 years	Female	Urine	Inpatient	Medical	Escherichia coli	E-BLSE	Not detected	Not detected	Not detected	Not detected	Not detected	Susceptible	Susceptible	Susceptible	Susceptible	Susceptible	Susceptible	Resistant	Susceptible	Susceptible	Susceptible	Susceptible
488	74	≥ 40 years	Male	Urine	Inpatient	Medical	Escherichia coli	E-BLSE	Not detected	Not detected	Not detected	Not detected	Not detected	Susceptible	Resistant	Resistant	Resistant	Resistant	Susceptible	Resistant	Susceptible	Susceptible	Susceptible	Susceptible
1363	18	< 40 years	Male	Urine	Inpatient	Medical	Enterobacter spp	E-BLSE	Not detected	Not detected	Not detected	Not detected	Not detected	Susceptible	Susceptible	Susceptible	Resistant	Resistant	Susceptible	Resistant	Susceptible	Susceptible	Susceptible	Susceptible
448	58	≥ 40 years	Male	Urine	Inpatient	Medical	Escherichia coli	E-BLSE	Not detected	Not detected	Not detected	Not detected	Not detected	Susceptible	Susceptible	Susceptible	Resistant	Resistant	Susceptible	Resistant	Susceptible	Susceptible	Susceptible	Susceptible
32	6	< 40 years	Female	abdominal fluid	Inpatient	Surgical	Escherichia coli	E-BLSE	Not detected	Not detected	Not detected	Not detected	Not detected	Susceptible	Susceptible	Susceptible	Susceptible	Susceptible		Resistant		Susceptible	Susceptible	Susceptible
491	79	≥ 40 years	Male	Urine	Inpatient	Medical	Klebsiella pneumoniae	E-BLSE	Not detected	Not detected	Not detected	Not detected	Not detected	Susceptible	Resistant	Resistant	Resistant	Resistant	Susceptible	Resistant	Susceptible	Susceptible	Susceptible	Susceptible
462	62	≥ 40 years	Male	Urine	Inpatient	Medical	Klebsiella oxytoca	E-BLSE	Not detected	Not detected	Not detected	Not detected	Not detected	Susceptible	Susceptible	Resistant	Resistant	Resistant	Susceptible	Resistant	Susceptible	Susceptible	Susceptible	Susceptible
435	68	≥ 40 years	Female	Urine	Inpatient	Medical	Escherichia coli	E-BLSE	Not detected	Not detected	Not detected	Not detected	Not detected	Susceptible	Susceptible	Susceptible	Resistant	Resistant	Susceptible	Resistant	Susceptible	Susceptible	Susceptible	Susceptible
479	60	≥ 40 years	Male	Urine	Inpatient	Medical	Escherichia coli	E-BLSE	Not detected	Not detected	Not detected	Not detected	Not detected	Susceptible	Resistant	Resistant	Resistant	Resistant	Susceptible	Resistant	Susceptible	Susceptible	Susceptible	Susceptible
444	75	≥ 40 years	Female	Urine	Inpatient	Medical	Escherichia coli	E-BLSE	Not detected	Not detected	Not detected	Not detected	Not detected	Susceptible	Resistant	Resistant	Resistant	Resistant	Susceptible	Resistant	Susceptible	Susceptible	Susceptible	Resistant
1217	50	≥ 40 years	Male	Urine	Inpatient	Emergencies and ICU	Escherichia coli	E-BLSE	Not detected	Not detected	Not detected	Not detected	Not detected	Susceptible	Resistant	Resistant	Resistant	Resistant	Susceptible	Resistant	Susceptible	Susceptible	Susceptible	Susceptible
1218	89	≥ 40 years	Male	Urine	Inpatient	Surgical	Escherichia coli	E-BLSE	Not detected	Not detected	Not detected	Not detected	Not detected	Susceptible	Resistant	Resistant	Resistant	Resistant	Susceptible	Resistant	Susceptible	Susceptible	Susceptible	Susceptible
1192	52	≥ 40 years	Male	Urine	Inpatient	Surgical	Klebsiella pneumoniae	E-BLSE	Not detected	Not detected	Not detected	Not detected	Not detected	Susceptible	Susceptible	Resistant	Resistant	Resistant	Susceptible	Susceptible	Resistant	Susceptible	Susceptible	Susceptible
322	24	< 40 years	Male	Urine	Inpatient	Surgical	Pantoea spp	E-BLSE	Not detected	Not detected	Not detected	Not detected	Not detected	Susceptible	Susceptible	Susceptible	Resistant	Resistant	Susceptible	Resistant	Susceptible	Susceptible	Susceptible	Susceptible
1104	63	≥ 40 years	Male	Urine	Inpatient	Medical	Klebsiella pneumoniae	E-BLSE	Not detected	Not detected	Not detected	Not detected	Not detected	Susceptible	Susceptible	Resistant	Resistant	Resistant	Susceptible	Resistant	Resistant	Susceptible	Susceptible	Susceptible
318	14	< 40 years	Male	Pus	Inpatient	Surgical	Escherichia coli	E-BLSE	Not detected	Not detected	Not detected	Not detected	Not detected	Susceptible	Susceptible	Susceptible	Resistant	Resistant		Resistant		Susceptible	Susceptible	Resistant
1389	64	≥ 40 years	Male	Urine	Inpatient	Medical	Escherichia coli	E-BLSE	Not detected	Not detected	Not detected	Not detected	Not detected	Susceptible	Resistant	Resistant	Resistant	Resistant	Susceptible	Resistant	Susceptible	Susceptible	Susceptible	Susceptible
1353	5	< 40 years	Male	Urine	Inpatient	Surgical	Enterobacter spp	E-BLSE	Not detected	Not detected	Not detected	Not detected	Not detected	Susceptible	Resistant	Resistant	Resistant	Resistant	Susceptible	Resistant	Susceptible	Susceptible	Susceptible	Susceptible
112	27	< 40 years	Male	Pus	Inpatient	Medical	Escherichia coli	E-BLSE	Not detected	Not detected	Not detected	Not detected	Not detected	Susceptible	Susceptible	Susceptible	Susceptible	Susceptible		Susceptible		Susceptible	Susceptible	Susceptible
1352	27	< 40 years	Male	Urine	Inpatient	Medical	Klebsiella pneumoniae	E-BLSE	Not detected	Not detected	Not detected	Not detected	Not detected	Susceptible	Resistant	Resistant	Susceptible	Susceptible	Susceptible	Resistant	Susceptible	Susceptible	Susceptible	Susceptible
1199	49	≥ 40 years	Male	Urine	Inpatient	Medical	Klebsiella pneumoniae	CRE	Not detected	Not detected	Not detected	Not detected	Not detected	Resistant	Resistant	Resistant	Resistant	Resistant	Resistant	Resistant	Resistant	Resistant	Susceptible	Susceptible
1425	36	< 40 years	Male	Urine	Outpatient		Escherichia coli	E-BLSE	Not detected	Not detected	Not detected	Not detected	Not detected	Susceptible	Resistant	Resistant	Resistant	Resistant	Susceptible	Resistant	Susceptible	Susceptible	Susceptible	Susceptible
1434	65	≥ 40 years	Male	Urine	Inpatient	Medical	Escherichia coli	E-BLSE	Not detected	Not detected	Not detected	Not detected	Not detected	Susceptible	Resistant	Resistant	Resistant	Resistant	Susceptible	Resistant	Susceptible	Susceptible	Susceptible	Susceptible
1438	4	< 40 years	Male	Urine	Inpatient	Medical	Klebsiella pneumoniae	E-BLSE	Not detected	Not detected	Not detected	Not detected	Not detected	Susceptible	Susceptible	Susceptible	Susceptible	Susceptible	Susceptible	Resistant	Susceptible	Susceptible	Susceptible	Susceptible
1444	49	≥ 40 years	Male	Urine	Inpatient	Surgical	Citrobacter spp	E-BLSE	Not detected	Not detected	Not detected	Not detected	Not detected	Susceptible	Susceptible	Resistant	Resistant	Resistant	Susceptible	Resistant	Susceptible	Susceptible	Susceptible	Susceptible
1220	4	< 40 years	Female	Urine	Inpatient	Surgical	Escherichia coli	CRE	Not detected	Not detected	Not detected	Not detected	Not detected	Resistant	Resistant	Resistant	Resistant	Resistant	Susceptible	Resistant	Susceptible	Resistant	Resistant	Susceptible
1929	65	≥ 40 years	Female	Urine	Inpatient	Medical	Pseudomonas aeruginosa	CRPA	Not detected	Detected	Detected	Detected	VIM+NDM+OXA-48	Resistant	Resistant		Resistant	Resistant		Resistant	Susceptible	Resistant	Resistant	Susceptible
1955	24	< 40 years	Male	Urine	Outpatient		Escherichia coli	E-BLSE	Not detected	Not detected	Not detected	Not detected	Not detected	Susceptible	Susceptible	Resistant	Resistant	Resistant	Susceptible	Resistant	Susceptible	Susceptible	Susceptible	Susceptible
1957	10	< 40 years	Male	Urine	Inpatient	Emergencies and ICU	Escherichia coli	E-BLSE	Not detected	Not detected	Not detected	Not detected	Not detected	Susceptible	Susceptible	Resistant	Susceptible	Susceptible	Susceptible	Resistant	Susceptible	Susceptible	Susceptible	Susceptible
1934	72	≥ 40 years	Male	Urine	Outpatient		Enterobacter spp	E-BLSE	Not detected	Not detected	Not detected	Not detected	Not detected	Susceptible	Susceptible	Resistant	Resistant	Resistant	Susceptible	Resistant	Susceptible	Susceptible	Susceptible	Susceptible
1932	70	≥ 40 years	Male	Urine	Inpatient	Emergencies and ICU	Klebsiella oxytoca	E-BLSE	Not detected	Not detected	Not detected	Not detected	Not detected	Susceptible	Susceptible	Resistant	Resistant	Resistant	Susceptible	Resistant	Susceptible	Susceptible	Susceptible	Susceptible
1982	80	≥ 40 years	Male	Urine	Inpatient	Emergencies and ICU	Citrobacter spp	E-BLSE	Not detected	Not detected	Not detected	Not detected	Not detected	Susceptible	Susceptible	Resistant	Resistant	Resistant	Susceptible	Resistant	Susceptible	Susceptible	Susceptible	Susceptible
1978	65	≥ 40 years	Male	Urine	Outpatient		Escherichia coli	E-BLSE	Not detected	Not detected	Not detected	Not detected	Not detected	Susceptible	Susceptible	Susceptible	Resistant	Resistant	Susceptible	Resistant	Susceptible	Susceptible	Susceptible	Susceptible
183	18	< 40 years	Male	Pus	Inpatient	Surgical	Escherichia coli	E-BLSE	Not detected	Not detected	Not detected	Not detected	Not detected	Susceptible	Susceptible	Susceptible	Susceptible	Susceptible		Resistant		Susceptible	Susceptible	Susceptible
185	1	< 40 years	Male	Pus	Inpatient	Emergencies and ICU	Klebsiella pneumoniae	E-BLSE	Not detected	Not detected	Not detected	Not detected	Not detected	Susceptible	Susceptible	Susceptible	Resistant	Resistant		Resistant		Susceptible	Susceptible	Susceptible
11	18	< 40 years	Female	Pus	Inpatient	Surgical	Citrobacter spp	E-BLSE	Not detected	Not detected	Not detected	Not detected	Not detected	Susceptible	Susceptible	Resistant	Resistant	Resistant		Resistant		Susceptible	Susceptible	Susceptible
55	11	< 40 years	Female	Pus	Outpatient		Escherichia coli	E-BLSE	Not detected	Not detected	Not detected	Not detected	Not detected	Susceptible	Susceptible	Susceptible	Resistant	Resistant		Resistant		Susceptible	Susceptible	Susceptible
1581	90	≥ 40 years	Male	Urine	Inpatient	Medical	Escherichia coli	E-BLSE	Not detected	Not detected	Not detected	Not detected	Not detected	Susceptible	Susceptible	Resistant	Resistant	Resistant	Susceptible	Resistant	Susceptible	Susceptible	Susceptible	Susceptible
12	1	< 40 years	Female	vaginal swab	Inpatient	Medical	Escherichia coli	CRE	Not detected	Not detected	Not detected	Not detected	Not detected	Resistant	Susceptible	Susceptible	Resistant	Resistant		Resistant		Susceptible	Susceptible	Susceptible
1005	22	< 40 years	Male	Urine	Outpatient		Escherichia coli	E-BLSE	Not detected	Not detected	Not detected	Not detected	Not detected	Susceptible	Susceptible	Resistant	Resistant	Resistant	Susceptible	Resistant	Susceptible	Susceptible	Susceptible	Susceptible
1025	14	< 40 years	Male	Urine	Inpatient	Medical	Klebsiella pneumoniae	E-BLSE	Not detected	Not detected	Not detected	Not detected	Not detected	Susceptible	Resistant	Resistant	Resistant	Resistant	Susceptible	Resistant	Susceptible	Susceptible	Susceptible	Susceptible
917	44	≥ 40 years	Male	Urine	Inpatient	Emergencies and ICU	Escherichia coli	E-BLSE	Not detected	Not detected	Not detected	Not detected	Not detected	Susceptible	Susceptible	Susceptible	Resistant	Resistant	Susceptible	Resistant	Susceptible	Susceptible	Susceptible	Susceptible
1734	5	< 40 years	Male	Urine	Inpatient	Medical	Klebsiella pneumoniae	E-BLSE	Not detected	Not detected	Not detected	Not detected	Not detected	Susceptible	Susceptible	Susceptible	Resistant	Resistant	Susceptible	Resistant	Resistant	Susceptible	Susceptible	Susceptible
1768	15	< 40 years	Male	Urine	Inpatient	Medical	Klebsiella pneumoniae	E-BLSE	Not detected	Not detected	Not detected	Not detected	Not detected	Susceptible	Susceptible	Susceptible	Resistant	Resistant	Susceptible	Resistant	Resistant	Susceptible	Susceptible	Susceptible
1733	60	≥ 40 years	Male	Urine	Inpatient	Medical	Escherichia coli	E-BLSE	Not detected	Not detected	Not detected	Not detected	Not detected	Susceptible	Resistant	Resistant	Resistant	Resistant	Susceptible	Resistant	Susceptible	Susceptible	Susceptible	Susceptible
1634	70	≥ 40 years	Male	Urine	Inpatient	Emergencies and ICU	Escherichia coli	E-BLSE	Not detected	Not detected	Not detected	Not detected	Not detected	Susceptible	Resistant	Resistant	Resistant	Resistant	Susceptible	Resistant	Susceptible	Susceptible	Susceptible	Susceptible
1792	32	< 40 years	Male	Urine	Inpatient	Medical	Klebsiella oxytoca	E-BLSE	Not detected	Not detected	Not detected	Not detected	Not detected	Susceptible	Susceptible	Susceptible	Resistant	Resistant	Susceptible	Resistant	Susceptible	Susceptible	Susceptible	Susceptible
1827	38	< 40 years	Male	Urine	Inpatient	Medical	Aeromonas hydrophila	CRE	Not detected	Detected	Detected	Not detected	VIM+NDM	Resistant	Resistant	Resistant	Resistant	Resistant	Resistant	Resistant	Susceptible	Resistant	Resistant	Susceptible
1760	37	< 40 years	Male	Urine	Inpatient	Medical	Escherichia coli	E-BLSE	Not detected	Not detected	Not detected	Not detected	Not detected	Susceptible	Susceptible	Resistant	Resistant	Resistant	Susceptible	Resistant	Susceptible	Susceptible	Susceptible	Susceptible
1791	66	≥ 40 years	Male	Urine	Inpatient	Medical	Escherichia coli	E-BLSE	Not detected	Not detected	Not detected	Not detected	Not detected	Susceptible	Susceptible	Susceptible	Resistant	Resistant	Susceptible	Resistant	Susceptible	Susceptible	Susceptible	Susceptible
1705	33	< 40 years	Female	Urine	Outpatient		Escherichia coli	E-BLSE	Not detected	Not detected	Not detected	Not detected	Not detected	Susceptible	Susceptible	Susceptible	Resistant	Resistant	Susceptible	Resistant	Susceptible	Susceptible	Susceptible	Susceptible
1741	45	≥ 40 years	Male	Urine	Inpatient	Medical	Klebsiella pneumoniae	CRE	Not detected	Detected	Detected	Detected	VIM+NDM+OXA-48	Resistant	Susceptible	Resistant	Resistant	Resistant	Susceptible	Resistant	Susceptible	Resistant	Resistant	Resistant
1726	60	≥ 40 years	Male	Urine	Inpatient	Medical	Escherichia coli	E-BLSE	Not detected	Not detected	Not detected	Not detected	Not detected	Susceptible	Susceptible	Susceptible	Resistant	Resistant	Susceptible	Resistant	Susceptible	Susceptible	Susceptible	Susceptible
1794	48	≥ 40 years	Female	Urine	Inpatient	Medical	Acinetobacter baumannii	CRAB	Not detected	Not detected	Not detected	Not detected	Not detected	Resistant	Susceptible	Resistant	Resistant	Resistant		Resistant			Susceptible
169	33	< 40 years	Male	Pus	Inpatient	Medical	Escherichia coli	E-BLSE	Not detected	Not detected	Not detected	Not detected	Not detected	Susceptible	Susceptible	Susceptible	Resistant	Resistant		Resistant		Susceptible	Susceptible	Susceptible
1405	68	≥ 40 years	Male	Urine	Inpatient	Medical	Acinetobacter baumannii	CRAB	Detected	Detected	Detected	Detected	KPC+VIM+NDM+OXA-48	Resistant	Susceptible	Susceptible	Resistant	Resistant		Resistant			Susceptible
1757	35	< 40 years	Male	Urine	Inpatient	Medical	Escherichia coli	CRE	Not detected	Not detected	Detected	Not detected	NDM	Resistant	Susceptible	Resistant	Resistant	Resistant	Susceptible	Resistant	Susceptible	Resistant	Resistant	Susceptible
1612	23	< 40 years	Male	Urine	Inpatient	Medical	Escherichia coli	E-BLSE	Not detected	Not detected	Not detected	Not detected	Not detected	Susceptible	Susceptible	Susceptible	Resistant	Resistant	Susceptible	Resistant	Susceptible	Susceptible	Susceptible	Susceptible
17	20	< 40 years	Female	vaginal swab	Inpatient	Medical	Escherichia coli	E-BLSE	Not detected	Not detected	Not detected	Not detected	Not detected	Susceptible	Susceptible	Resistant	Resistant	Resistant		Resistant		Susceptible	Susceptible	Susceptible
1363	18	< 40 years	Male	Urine	Inpatient	Medical	Enterobacter spp	E-BLSE	Not detected	Not detected	Not detected	Not detected	Not detected	Susceptible	Resistant	Susceptible	Resistant	Resistant	Susceptible	Resistant	Susceptible	Susceptible	Susceptible	Susceptible
1434	65	≥ 40 years	Male	Urine	Inpatient	Medical	Escherichia coli	E-BLSE	Not detected	Not detected	Not detected	Not detected	Not detected	Susceptible	Susceptible	Resistant	Resistant	Resistant	Susceptible	Resistant	Susceptible	Susceptible	Susceptible	Susceptible
1428	15	< 40 years	Male	Urine	Inpatient	Surgical	Escherichia coli	CRE	Not detected	Detected	Detected	Detected	VIM+NDM+OXA-48	Resistant	Resistant	Resistant	Susceptible	Susceptible	Susceptible	Resistant	Susceptible	Susceptible	Susceptible	Resistant
1540	7	< 40 years	Male	Urine	Inpatient	Emergencies and ICU	Escherichia coli	E-BLSE	Not detected	Not detected	Not detected	Not detected	Not detected	Susceptible	Susceptible	Resistant	Susceptible	Susceptible	Susceptible	Resistant	Susceptible	Susceptible	Susceptible	Susceptible
1659	65	≥ 40 years	Male	Urine	Inpatient	Medical	Escherichia coli	E-BLSE	Not detected	Not detected	Not detected	Not detected	Not detected	Susceptible	Resistant	Resistant	Resistant	Resistant	Susceptible	Resistant	Susceptible	Susceptible	Susceptible	Susceptible
1591	4	< 40 years	Male	Urine	Inpatient	Medical	Escherichia coli	E-BLSE	Not detected	Not detected	Not detected	Not detected	Not detected	Susceptible	Susceptible	Susceptible	Resistant	Resistant	Susceptible	Resistant	Susceptible	Susceptible	Susceptible	Susceptible
112	27	< 40 years	Male	Pus	Inpatient	Medical	Escherichia coli	E-BLSE	Not detected	Not detected	Not detected	Not detected	Not detected	Susceptible	Susceptible	Susceptible	Susceptible	Susceptible		Susceptible		Susceptible	Susceptible	Susceptible
1406	4	< 40 years	Male	Urine	Inpatient	Surgical	Escherichia coli	E-BLSE	Not detected	Not detected	Not detected	Not detected	Not detected	Susceptible	Susceptible	Resistant	Susceptible	Susceptible	Susceptible	Susceptible	Susceptible	Susceptible	Susceptible	Susceptible
1552	35	< 40 years	Male	Urine	Inpatient	Medical	Escherichia coli	CRE	Not detected	Not detected	Not detected	Not detected	Not detected	Resistant	Susceptible	Resistant	Susceptible	Susceptible	Susceptible	Resistant	Susceptible	Susceptible	Susceptible	Susceptible
1366	2	< 40 years	Female	Urine	Inpatient	Emergencies and ICU	Escherichia coli	E-BLSE	Not detected	Not detected	Not detected	Not detected	Not detected	Susceptible	Susceptible	Susceptible	Susceptible	Susceptible	Susceptible	Resistant	Susceptible	Susceptible	Susceptible	Susceptible
1565	65	≥ 40 years	Male	Urine	Inpatient	Medical	Escherichia coli	E-BLSE	Not detected	Not detected	Not detected	Not detected	Not detected	Susceptible	Susceptible	Susceptible	Resistant	Resistant	Susceptible	Resistant	Susceptible	Susceptible	Susceptible	Susceptible
1658	70	≥ 40 years	Male	Urine	Inpatient	Medical	Serratia odorifera	E-BLSE	Not detected	Not detected	Not detected	Not detected	Not detected	Susceptible	Susceptible	Susceptible	Susceptible	Susceptible	Susceptible	Resistant	Susceptible	Susceptible	Susceptible	Susceptible
1425	36	< 40 years	Male	Urine	Outpatient		Escherichia coli	E-BLSE	Not detected	Not detected	Not detected	Not detected	Not detected	Susceptible	Susceptible	Susceptible	Resistant	Resistant	Susceptible	Resistant	Susceptible	Susceptible	Susceptible	Susceptible
1551	45	≥ 40 years	Male	Urine	Inpatient	Medical	Serratia marcescens	E-BLSE	Not detected	Not detected	Not detected	Not detected	Not detected	Susceptible	Susceptible	Susceptible	Resistant	Resistant	Susceptible	Resistant	Susceptible	Susceptible	Susceptible	Susceptible
1401	64	≥ 40 years	Male	Urine	Inpatient	Medical	Escherichia coli	CRE	Not detected	Detected	Not detected	Detected	VIM+OXA-48	Resistant	Resistant	Resistant	Resistant	Resistant	Susceptible	Resistant	Resistant	Resistant	Susceptible	Resistant
1560	45	≥ 40 years	Male	Urine	Inpatient	Medical	Klebsiella oxytoca	E-BLSE	Not detected	Not detected	Not detected	Not detected	Not detected	Susceptible	Susceptible	Resistant	Resistant	Resistant	Resistant	Resistant	Susceptible	Susceptible	Susceptible	Susceptible
132	10	< 40 years	Female	Pus	Inpatient	Surgical	Serratia odorifera	E-BLSE	Not detected	Not detected	Not detected	Not detected	Not detected	Susceptible	Susceptible	Susceptible	Susceptible	Susceptible		Resistant		Susceptible	Susceptible	Susceptible
1512	24	< 40 years	Female	Urine	Inpatient	Medical	Escherichia coli	E-BLSE	Not detected	Not detected	Not detected	Not detected	Not detected	Susceptible	Susceptible	Susceptible	Resistant	Resistant	Susceptible	Resistant	Susceptible	Susceptible	Susceptible	Susceptible
2121	50	≥ 40 years	Male	Urine	Outpatient		Escherichia coli	CRE	Not detected	Not detected	Detected	Not detected	NDM	Resistant	Susceptible	Resistant	Resistant	Resistant	Resistant	Resistant	Resistant	Susceptible	Susceptible	Resistant
2227	70	≥ 40 years	Male	Urine	Inpatient	Emergencies and ICU	Acinetobacter baumannii	CRAB	Not detected	Detected	Detected	Not detected	VIM+NDM	Resistant	Resistant	Resistant	Resistant	Resistant		Resistant		Susceptible	Susceptible	Resistant
2140	1.08	< 40 years	Male	Urine	Inpatient	Medical	Escherichia coli	E-BLSE	Not detected	Not detected	Not detected	Not detected	Not detected	Susceptible	Susceptible	Susceptible	Resistant	Resistant	Susceptible	Resistant	Susceptible			Susceptible
2143	3	< 40 years	Male	Urine	Inpatient	Medical	Escherichia coli	E-BLSE	Not detected	Not detected	Not detected	Not detected	Not detected	Susceptible	Susceptible	Susceptible	Resistant	Resistant	Resistant	Resistant	Susceptible			Susceptible
2147	75	≥ 40 years	Male	Urine	Inpatient	Medical	Escherichia coli	E-BLSE	Not detected	Not detected	Not detected	Not detected	Not detected	Susceptible	Susceptible	Susceptible	Susceptible	Susceptible	Susceptible	Resistant	Susceptible			Susceptible
2155	10	< 40 years	Female	Urine	Outpatient		Escherichia coli	E-BLSE	Not detected	Not detected	Not detected	Not detected	Not detected	Susceptible	Susceptible	Susceptible	Resistant	Resistant	Susceptible	Resistant	Susceptible			Susceptible
2202	0.16	< 40 years	Male	Urine	Inpatient	Medical	Escherichia coli	E-BLSE	Not detected	Not detected	Not detected	Not detected	Not detected	Susceptible	Susceptible	Resistant	Resistant	Resistant	Susceptible	Resistant	Susceptible			Susceptible
2199	33	< 40 years	Male	Urine	Outpatient		Escherichia coli	E-BLSE	Not detected	Not detected	Not detected	Not detected	Not detected	Susceptible	Susceptible	Resistant	Resistant	Resistant	Resistant	Resistant	Susceptible			Susceptible
2191	87	≥ 40 years	Male	Urine	Inpatient	Medical	Escherichia coli	E-BLSE	Not detected	Not detected	Not detected	Not detected	Not detected	Susceptible	Resistant	Resistant	Resistant	Resistant	Susceptible	Resistant	Susceptible			Susceptible
2232	65	≥ 40 years	Male	Urine	Inpatient	Medical	Acinetobacter baumannii	CRAB	Not detected	Detected	Not detected	Detected	VIM+OXA-48	Resistant	Susceptible	Susceptible	Resistant	Resistant		Resistant		Susceptible	Susceptible	Resistant
2242	77	≥ 40 years	Male	Urine	Inpatient	Medical	Escherichia coli	CRE	Not detected	Detected	Not detected	Not detected	Not detected	Resistant	Susceptible	Resistant	Resistant	Resistant	Susceptible	Resistant	Susceptible	Susceptible	Susceptible	Resistant
204	7	< 40 years	Female	Pus	Inpatient	Surgical	Escherichia coli	E-BLSE	Not detected	Not detected	Not detected	Not detected	Not detected	Susceptible	Susceptible	Resistant	Resistant	Resistant		Susceptible		Susceptible	Susceptible	Susceptible
200	19	< 40 years	Female	Pus	Inpatient	Surgical	Klebsiella pneumoniae	E-BLSE	Not detected	Not detected	Not detected	Not detected	Not detected	Susceptible	Susceptible	Resistant	Susceptible	Susceptible		Susceptible		Susceptible	Susceptible	Susceptible
2247	74	≥ 40 years	Male	Urine	Inpatient	Medical	Escherichia coli	E-BLSE	Not detected	Not detected	Not detected	Not detected	Not detected	Susceptible	Susceptible	Resistant	Resistant	Resistant	Susceptible	Resistant	Susceptible	Susceptible	Susceptible	Susceptible
2245	1.58	< 40 years	Male	Urine	Inpatient	Medical	Klebsiella oxytoca	CRE	Not detected	Not detected	Not detected	Not detected	Not detected	Resistant	Susceptible	Resistant	Resistant	Resistant	Susceptible	Resistant	Susceptible	Susceptible	Susceptible	Resistant
2225	0.66	< 40 years	Female	Urine	Inpatient	Medical	Escherichia coli	CRE	Not detected	Detected	Detected	Not detected	VIM+NDM	Resistant	Susceptible	Resistant	Resistant	Resistant	Susceptible	Resistant	Susceptible	Susceptible	Susceptible	Resistant
206	8	< 40 years	Male	Pus	Inpatient	Medical	Escherichia coli	E-BLSE	Not detected	Not detected	Not detected	Not detected	Not detected	Susceptible	Susceptible	Susceptible	Susceptible	Susceptible		Resistant		Susceptible	Susceptible	Susceptible
2269	48	≥ 40 years	Male	Urine	Outpatient		Escherichia coli	CRE	Not detected	Detected	Not detected	Not detected	VIM	Resistant	Susceptible	Resistant	Resistant	Resistant	Susceptible	Resistant	Susceptible	Susceptible	Susceptible	Susceptible
2288	70	≥ 40 years	Male	Urine	Inpatient	Medical	Escherichia coli	E-BLSE	Not detected	Not detected	Not detected	Not detected	Not detected	Susceptible	Resistant	Resistant	Resistant	Resistant	Susceptible	Resistant	Susceptible	Susceptible	Susceptible	Susceptible
2319	0.25	< 40 years	Male	Urine	Inpatient	Medical	Escherichia coli	CRE	Not detected	Detected	Not detected	Not detected	VIM	Resistant	Resistant	Resistant	Resistant	Resistant	Resistant	Resistant	Susceptible	Susceptible	Susceptible	Susceptible
2270	75	≥ 40 years	Male	Urine	Inpatient	Medical	Klebsiella pneumoniae	E-BLSE	Not detected	Not detected	Not detected	Not detected	Not detected	Susceptible	Susceptible	Resistant	Resistant	Resistant	Susceptible	Resistant	Susceptible			Susceptible
2230	56	≥ 40 years	Female	Urine	Outpatient		Escherichia coli	E-BLSE	Not detected	Not detected	Not detected	Not detected	Not detected	Susceptible	Susceptible	Resistant	Resistant	Resistant	Susceptible	Resistant	Susceptible			Susceptible
2282	74	≥ 40 years	Male	Urine	Inpatient	Medical	Pseudomonas aeruginosa	CRPA	Not detected	Not detected	Detected	Not detected	NDM	Resistant	Resistant	Resistant	Resistant	Resistant		Resistant	Susceptible	Resistant	Resistant	Susceptible
2277	0.75	< 40 years	Female	Urine	Outpatient		Escherichia coli	CRE	Not detected	Not detected	Not detected	Not detected	Not detected	Resistant	Susceptible	Resistant	Resistant	Resistant	Susceptible	Resistant	Susceptible	Susceptible	Susceptible	Resistant
2289	69	≥ 40 years	Male	Urine	Inpatient	Medical	Escherichia coli	E-BLSE	Not detected	Not detected	Not detected	Not detected	Not detected	Susceptible	Susceptible	Resistant	Resistant	Resistant	Susceptible	Resistant	Susceptible	Susceptible	Susceptible	Susceptible
2323	61	≥ 40 years	Male	Urine	Inpatient	Medical	Escherichia coli	E-BLSE	Not detected	Not detected	Not detected	Not detected	Not detected	Susceptible	Susceptible	Susceptible	Resistant	Resistant	Susceptible	Resistant	Susceptible	Susceptible	Susceptible	Susceptible
2235	38	< 40 years	Male	Urine	Inpatient	Medical	Escherichia coli	E-BLSE	Not detected	Not detected	Not detected	Not detected	Not detected	Susceptible	Resistant	Resistant	Resistant	Resistant	Susceptible	Resistant	Susceptible	Susceptible	Susceptible	Susceptible
2040	23	< 40 years	Female	Urine	Inpatient	Medical	Escherichia coli	E-BLSE	Not detected	Not detected	Not detected	Not detected	Not detected	Susceptible	Susceptible	Resistant	Resistant	Resistant	Susceptible	Resistant	Susceptible			Susceptible
2095	22	< 40 years	Female	Urine	Outpatient		Escherichia coli	E-BLSE	Not detected	Not detected	Not detected	Not detected	Not detected	Susceptible	Susceptible	Susceptible	Resistant	Resistant	Susceptible	Resistant	Susceptible			Susceptible
2063	5	< 40 years	Male	Urine	Inpatient	Medical	Klebsiella pneumoniae	E-BLSE	Not detected	Not detected	Not detected	Not detected	Not detected	Susceptible	Susceptible	Resistant	Susceptible	Susceptible	Susceptible	Resistant	Susceptible			Susceptible
2055	2	< 40 years	Male	Urine	Outpatient		Klebsiella pneumoniae	E-BLSE	Not detected	Not detected	Not detected	Not detected	Not detected	Susceptible	Susceptible	Susceptible	Susceptible	Susceptible	Susceptible	Resistant	Susceptible			Susceptible
2051	74	≥ 40 years	Male	Urine	Outpatient		Escherichia coli	E-BLSE	Not detected	Not detected	Not detected	Not detected	Not detected	Susceptible	Susceptible	Resistant	Resistant	Resistant	Susceptible	Resistant	Susceptible			Susceptible
2540	58	≥ 40 years	Male	Urine	Inpatient	Medical	Serratia odorifera	E-BLSE	Not detected	Not detected	Not detected	Not detected	Not detected	Susceptible	Susceptible	Resistant	Resistant	Resistant	Resistant	Resistant	Susceptible	Susceptible	Susceptible	Susceptible
2560	75	≥ 40 years	Male	Urine	Inpatient	Medical	Citrobacter spp	CRE	Not detected	Detected	Detected	Not detected	Not detected	Resistant	Susceptible	Resistant	Resistant	Resistant	Resistant	Resistant	Susceptible	Resistant	Resistant	Resistant
2501	90	≥ 40 years	Male	Urine	Inpatient	Medical	Klebsiella oxytoca	CRE	Not detected	Detected	Detected	Detected	VIM+NDM+OXA-48	Resistant	Resistant	Susceptible	Resistant	Resistant	Resistant	Resistant	Susceptible	Resistant	Susceptible	Resistant
2385	61	≥ 40 years	Male	Urine	Inpatient	Medical	Escherichia coli	CRE	Not detected	Not detected	Not detected	Not detected	Not detected	Resistant	Susceptible	Resistant	Resistant	Resistant	Susceptible	Resistant	Susceptible	Susceptible	Susceptible	Resistant
25	66	≥ 40 years	Male	Urine	Inpatient	Medical	Escherichia coli	CRE	Not detected	Not detected	Not detected	Not detected	Not detected	Resistant	Susceptible	Resistant	Resistant	Resistant	Susceptible	Resistant	Susceptible	Susceptible	Susceptible	Resistant
2495	58	≥ 40 years	Male	Urine	Outpatient		Escherichia coli	CRE	Not detected	Not detected	Not detected	Not detected	Not detected	Resistant	Susceptible	Resistant	Resistant	Resistant	Susceptible	Resistant	Susceptible	Susceptible	Susceptible	Susceptible
2641	54	≥ 40 years	Male	Urine	Inpatient	Medical	Escherichia coli	CRE	Not detected	Not detected	Not detected	Not detected	Not detected	Resistant	Susceptible	Resistant	Resistant	Resistant	Susceptible	Resistant	Susceptible	Susceptible	Susceptible	Susceptible
2377	32	< 40 years	Female	Urine	Inpatient	Medical	Escherichia coli	CRE	Not detected	Detected	Detected	Detected	VIM+NDM+OXA-48	Resistant	Susceptible	Resistant	Resistant	Resistant	Susceptible	Resistant	Susceptible	Susceptible	Susceptible	Susceptible
2652	77	≥ 40 years	Male	Urine	Inpatient	Medical	Serratia odorifera	CRE	Not detected	Detected	Detected	Not detected	VIM+NDM	Resistant	Susceptible	Resistant	Resistant	Resistant	Resistant	Resistant	Susceptible			Susceptible
35	55	≥ 40 years	Male	Pus	Outpatient		Escherichia coli	CRE	Not detected	Detected	Detected	Not detected	VIM+NDM	Resistant	Susceptible	Resistant	Resistant	Resistant		Resistant		Resistant	Susceptible	Susceptible
2670	0.75	< 40 years	Female	Urine	Inpatient	Medical	Escherichia coli	CRE	Not detected	Detected	Detected	Not detected	VIM+NDM	Resistant	Resistant	Resistant	Resistant	Resistant	Susceptible	Resistant	Susceptible	Susceptible	Susceptible	Resistant
249	37	< 40 years	Female	Pus	Inpatient	Surgical	Escherichia coli	E-BLSE	Not detected	Not detected	Not detected	Not detected	Not detected	Susceptible	Resistant	Susceptible	Resistant	Resistant		Resistant		Susceptible	Susceptible	Susceptible
2685	72	≥ 40 years	Male	Urine	Inpatient	Medical	Escherichia coli	CRE	Not detected	Not detected	Not detected	Not detected	Not detected	Resistant	Susceptible	Susceptible	Resistant	Resistant	Resistant	Resistant	Susceptible	Susceptible	Susceptible	Resistant
246	21	< 40 years	Male	Pus	Inpatient	Surgical	Morganella morganii	CRE	Not detected	Not detected	Not detected	Not detected	Not detected	Resistant	Susceptible	Resistant	Resistant	Resistant		Resistant		Resistant	Susceptible	Resistant
2773	66	≥ 40 years	Male	Urine	Inpatient	Medical	Pantoea spp	E-BLSE	Not detected	Not detected	Not detected	Not detected	Not detected	Susceptible	Susceptible	Resistant	Resistant	Resistant	Susceptible	Resistant	Susceptible	Susceptible	Susceptible	Susceptible
2764	44	≥ 40 years	Female	Urine	Outpatient		Citrobacter spp	E-BLSE	Not detected	Not detected	Not detected	Not detected	Not detected	Susceptible	Susceptible	Susceptible	Resistant	Resistant	Susceptible	Resistant	Susceptible	Susceptible	Susceptible	Susceptible
2676	71	≥ 40 years	Male	Urine	Outpatient		Escherichia coli	E-BLSE	Not detected	Not detected	Not detected	Not detected	Not detected	Susceptible	Resistant	Susceptible	Resistant	Resistant	Susceptible	Resistant	Susceptible	Susceptible	Susceptible	Susceptible
2732	18	< 40 years	Female	Urine	Outpatient		Escherichia coli	E-BLSE	Not detected	Not detected	Not detected	Not detected	Not detected	Susceptible	Susceptible	Susceptible	Resistant	Resistant	Susceptible	Resistant	Susceptible	Susceptible	Susceptible	Susceptible
2751	1.41	< 40 years	Male	Urine	Inpatient	Medical	Escherichia coli	E-BLSE	Not detected	Not detected	Not detected	Not detected	Not detected	Susceptible	Susceptible	Susceptible	Susceptible	Susceptible	Susceptible	Resistant	Susceptible	Susceptible	Susceptible	Susceptible
2681	65	≥ 40 years	Male	Urine	Outpatient		Escherichia coli	E-BLSE	Not detected	Not detected	Not detected	Not detected	Not detected	Susceptible	Susceptible	Susceptible	Resistant	Resistant	Susceptible	Resistant	Susceptible	Susceptible	Susceptible	Susceptible
2711	67	≥ 40 years	Male	Urine	Outpatient		Escherichia coli	CRE	Not detected	Not detected	Not detected	Not detected	Not detected	Resistant	Susceptible	Resistant	Resistant	Resistant	Susceptible	Resistant	Susceptible	Susceptible	Susceptible	Resistant
